# Supplementary material for: Comparative safety of the sodium glucose co-transporter 2 (SGLT2) inhibitors: a systematic review and meta-analysis
Source: PubMed Central journal article supplement — BMJ Open. 2019 Feb 1;9(1):e022577. doi: 10.1136/bmjopen-2018-022577 (PMC6361337; doi:10.1136/bmjopen-2018-022577), 2019-02-01
Supplement: bmjopen-2018-022577.draft_revisions.pdf [file bmjopen-2018-022577.draft_revisions.pdf]

# BMJ Open

BMJ Open is committed to open peer review. As part of this commitment we make the peer review history of every article we publish publicly available.

When an article is published we post the peer reviewers' comments and the authors' responses online. We also post the versions of the paper that were used during peer review. These are the versions that the peer review comments apply to.

The versions of the paper that follow are the versions that were submitted during the peer review process. They are not the versions of record or the final published versions. They should not be cited or distributed as the published version of this manuscript.

BMJ Open is an open access journal and the full, final, typeset and author-corrected version of record of the manuscript is available on our site with no access controls, subscription charges or pay-per-view fees (<http://bmjopen.bmj.com>).

If you have any questions on BMJ Open's open peer review process please email [info.bmjopen@bmj.com](mailto:info.bmjopen@bmj.com)

# BMJ Open

## Comparative safety of the sodium glucose co-transporter 2 (SGLT2) inhibitors: A systematic review and meta-analysis.

|                               |                                                                                                                                                                                                                                                                                                                                                                                                                                                                                                                                                                                                                                                                                                                                                                                                                                                                 |
|-------------------------------|-----------------------------------------------------------------------------------------------------------------------------------------------------------------------------------------------------------------------------------------------------------------------------------------------------------------------------------------------------------------------------------------------------------------------------------------------------------------------------------------------------------------------------------------------------------------------------------------------------------------------------------------------------------------------------------------------------------------------------------------------------------------------------------------------------------------------------------------------------------------|
| Journal:                      | <i>BMJ Open</i>                                                                                                                                                                                                                                                                                                                                                                                                                                                                                                                                                                                                                                                                                                                                                                                                                                                 |
| Manuscript ID                 | bmjopen-2018-022577                                                                                                                                                                                                                                                                                                                                                                                                                                                                                                                                                                                                                                                                                                                                                                                                                                             |
| Article Type:                 | Research                                                                                                                                                                                                                                                                                                                                                                                                                                                                                                                                                                                                                                                                                                                                                                                                                                                        |
| Date Submitted by the Author: | 02-Mar-2018                                                                                                                                                                                                                                                                                                                                                                                                                                                                                                                                                                                                                                                                                                                                                                                                                                                     |
| Complete List of Authors:     | Donnan, Jennifer; Memorial University of Newfoundland, Pharmacy<br>Grandy, Catherine; Memorial University of Newfoundland, Pharmacy<br>Chibrikov, Eugene; Memorial University of Newfoundland, Medicine<br>Marra, Carlo; University of Otago, Pharmacy<br>Aubrey-Bassler, Kris; Memorial University, Primary Healthcare Research Unit<br>Johnston, Karissa; Memorial University of Newfoundland, Pharmacy<br>Najafzadeh, Mehdi; Harvard Medical School, Division of Pharmacoepidemiology and Pharmacoeconomics at the Brigham and Women's Hospital<br>Swab, Michelle; Memorial University of Newfoundland<br>Hache, Jenna; Memorial University of Newfoundland, Pharmacy<br>Curnew, Daniel; Memorial University, Pharmacy<br>Hai, van Nguyen; Memorial University of Newfoundland, School of Pharmacy<br>Gamble, John Michael; University of Waterloo, Pharmacy |
| Keywords:                     | DIABETES & ENDOCRINOLOGY, EPIDEMIOLOGY, THERAPEUTICS, Adverse events < THERAPEUTICS                                                                                                                                                                                                                                                                                                                                                                                                                                                                                                                                                                                                                                                                                                                                                                             |
|                               |                                                                                                                                                                                                                                                                                                                                                                                                                                                                                                                                                                                                                                                                                                                                                                                                                                                                 |

SCHOLARONE™  
Manuscripts

1  
2 **Comparative safety of the sodium glucose co-transporter 2 (SGLT2) inhibitors: A**  
3 **systematic review and meta-analysis.**  
4

5  
6 Short Running Title: Comparative Safety of SGLT2 Inhibitors  
7

8 Jennifer R. Donnan<sup>1</sup>, Jennifer.donnan@mun.ca  
9

10 Catherine Grandy<sup>1</sup>, cag771@mun.ca  
11

12 Eugene Chibrikov<sup>1</sup>, eugenec@mun.ca  
13

14 Carlo A. Marra<sup>1,2</sup>, carlo.marra@otago.ac.nz  
15

16 Kris Aubrey-Bassler<sup>3</sup>, kaubrey@mun.ca  
17

18 Karissa Johnston<sup>1</sup>, kjohnston@broadstreetheor.com  
19

20 Mehdi Najafzadeh<sup>4</sup>, MNAJAFZADEH@bwh.harvard.edu  
21

22 Michelle Swab<sup>3</sup>, mswab@mun.ca  
23

24 Jenna Hache<sup>1</sup>, jrh835@mun.ca  
25

26 Daniel Curnew<sup>1</sup>, daniel.curnew@gmail.com  
27

28 Hai Nguyen<sup>1</sup>, hvnguyen@mun.ca  
29

30 John-Michael Gamble<sup>1,5</sup>, jm.gamble@uwaterloo.ca  
31

32  
33 <sup>1</sup> School of Pharmacy, Memorial University, St. John's, Newfoundland and Labrador, Canada.

34 <sup>2</sup> School of Pharmacy, University of Otago, Dunedin, New Zealand.

35 <sup>3</sup> Faculty of Medicine, Memorial University, St. John's, Newfoundland and Labrador, Canada.

36 <sup>4</sup> Department of Medicine, Harvard Medical School, Boston, Massachusetts, USA

37 <sup>5</sup> School of Pharmacy, Faculty of Science, University of Waterloo, Waterloo, Ontario, Canada.  
38

39 Corresponding Author: John-Michael Gamble  
40

41 School of Pharmacy  
42

43 University of Waterloo  
44

45 10A Victoria Street S  
46

47 Kitchener, ON, Canada N2G 1C5  
48

49 Phone: (519) 888-4567 Fax: (519) 883-7580  
50

51 jm.gamble@uwaterloo.ca  
52

53  
54 **Key Words:** Type 2 Diabetes, SGLT2 Inhibitors, Adverse Events, Systematic Review  
55

56 **Word Count**  
57

58 Abstract: 299  
59

60 Main Text: 4008

## Abstract

**Objective:** To address the current knowledge gap surrounding the post-market serious safety outcomes of the sodium glucose co-transporter-2 (SGLT2) inhibitors identified by the Food and Drug Administration (FDA), the European Medicines Associations (EMA) and Health Canada.

**Design:** We conducted a systematic review and meta-analysis of randomized controlled trials (RCT). PubMed, Cochrane Library, EMBASE, International Pharmaceutical Abstracts, ProQuest, and ClinicalTrials.gov were searched from inception to July 2017. Random effects models were used to estimate pooled relative risks.

**Intervention:** SGLT2 Inhibitors, compared to placebo or active comparators.

**Primary Outcomes:** Acute kidney injury (AKI), diabetic ketoacidosis (DKA), urinary tract infections (UTI), bone fractures, and amputations.

**Results:** We screened 1865 citations of which 99 were included in the analysis. Most studies included one of four SGLT2 inhibitors, dapagliflozin, canagliflozin, empagliflozin, and ipragliflozin. When compared to placebo, SGLT2 inhibitors were found to be significantly protective against AKI (RR = 0.59; 95% CI 0.39-0.89;  $I^2=0.0\%$ ), while no difference was found for DKA (RR = 0.65; 95% CI 0.28-1.50;  $I^2=0.0\%$ ), UTI (RR = 1.03; 95% CI 0.96-1.10;  $I^2=0.0\%$ ), or bone fracture (RR = 0.86; 95% CI 0.67-1.09;  $I^2=2.2\%$ ). No increased risk for either outcome was found when compared to active controls, and no studies reported on amputations. Sub-group analysis did show an increased risk of UTI with dapagliflozin only (RR 1.23; 95% CI 1.03-1.46;  $I^2=4.9\%$ ), but no other analysis supported an increased risk of AKI, DKA, UTI, or fracture.

**Conclusions:** Current evidence from RCTs does not suggest an increased risk of harm with SGLT2 inhibitors as a class over placebo or active comparators with respect to the AKI, DKA, UTI or fracture. However, wide confidence intervals for many comparisons suggest limited precision, and therefore clinically important adverse events cannot be ruled out. Dapagliflozin, does appear to independently increase the risk of UTI.

**Trial Registration:** PROSPERO CRD42016038715



## Article Summary

- Our objective is to address the current knowledge gap surrounding the post-market safety of the SGLT2 inhibitors compared to active and non-active comparators in patients with type 2 diabetes.

### *Strengths and Limitations of the Study*

- This study provides the most comprehensive systematic review of the serious adverse events related to use of SGLT2 inhibitors identified by major drug regulatory agencies worldwide to date.
- This study only considered select outcomes to provide focused attention on the issues concerning regulators, however this means that additional knowledge of the clinical benefits and harms needs to be considered before applying the results of this study.
- Several of the outcomes (e.g., AKI, DKA, limb amputations) we evaluated occur infrequently and, in some cases, were not reported at all.
- Certain outcomes may have been inadequately characterized within study reports. For example, while UTIs were commonly reported among RCTs included in this meta-analysis, data on complicated versus uncomplicated infections were not.

## 1.0 Introduction

The sodium glucose co-transporter 2 (SGLT2) inhibitors are a novel drug class available for the management of type 2 diabetes. Clinical guidelines recommend the SGLT2 inhibitors as one of numerous potential pharmacologic approaches for second-line therapy following metformin failure or intolerance.[1, 2] Some clinical guidelines recommend the SGLT2 inhibitor, empagliflozin, or the Glucagon-like peptide-1 (GLP-1) receptor agonist, liraglutide, as preferred second-line therapies in patients with cardiovascular disease who have failed to achieve glycemic control while on monotherapy.[1] This paradigm shift in the management of type 2 diabetes is largely supported by evidence from recent landmark clinical trials.[3–5] In 2015 the EMPA-REG trial showed that the SGLT2 inhibitor, empagliflozin, significantly reduced the risk for composite endpoint of cardiovascular death, myocardial infarction, or stroke by 14% and all-cause mortality by 32%, in a population with existing cardiovascular disease.[3] The LEADER and SUSTAIN-6 trials have also demonstrated similar benefits with liraglutide and semaglutide.[4, 5]

Considering the relative potential harms and benefits, clinicians and policy makers must continue to integrate new pharmacotherapeutic evidence to optimize health outcomes. Although the EMPA-REG trial showed that the SGLT2 inhibitor, empagliflozin, significantly reduces the risk of cardiovascular morbidity and mortality, regulatory agencies including the Food and Drug Administration (FDA), the European Medicines Associations (EMA) and Health Canada have issued safety warnings for several adverse events. These include acute kidney injury (AKI), diabetic ketoacidosis (DKA), urinary tract infections (UTI), bone fractures and lower limb amputations, based primarily on case report data. [6–13]

With respect to AKI, there is conflicting information coming forward from clinical trials and case reports. Despite early indication of a protective effect from SGLT2 inhibitors,[14] the FDA published in a safety communication in June 2016 that 101 cases of AKI were reported among users of canagliflozin and dapagliflozin.[11] To date, no meta-analysis of AKI has been published. In May 2015 the FDA published a safety update indicating an increased risk of DKA and UTI. They identified 73 cases of DKA and 19 cases of life-threatening infections that originated as a UTI, had been identified in patients taking a SGLT2 inhibitor. However, to date clinical trial evidence does not support these potential risks. Four published meta-analyses of randomized control trials (RCT) and found no increased risk of UTIs, except within a sub-group of dapagliflozin,[15–18] and one study found an increased risk with empagliflozin 25mg users.[17] No meta-analysis on the risk of DKA currently exists. In January 2016, the FDA issued an expanded warning regarding a potential increased risk for fracture with canagliflozin.[8] Two published meta-analyses.[18, 19] of SGLT2 inhibitors did not find an increased risk, nor did a pooled analysis of eight canagliflozin trials.[20] Finally, in May 2017, the FDA supported earlier speculation of increased risk of low limb amputation[10] with evidence gathered from re-analysis the CANVAS and CANVAS-R trials, demonstrating a

1  
2 two-fold increased risk.[21] No meta-analysis of RCTs currently exists with respect to  
3 amputation.  
4

5  
6 In light of recent guideline changes that promote earlier integration of the SGLT2  
7 inhibitors into therapy, clinicians and policy makers need to continue examining the potential  
8 risks to their patients. Our objective is to address the current knowledge gap surrounding the  
9 post-market safety of the SGLT2 inhibitors compared to active and non-active comparators in  
10 patients with type 2 diabetes. We have conducted a systematic review and meta-analysis of  
11 RCTs to estimate the risk of AKI, DKA, UTI, bone fracture and lower limb amputation.  
12  
13

## 14 15 16 **2.0 Methods and Analysis**

### 17 18 **2.1 Study Design**

19 This study has been designed in accordance with the PRISMA statement on  
20 systematic reviews and meta-analysis.[22] This protocol has been registered  
21 (CRD42016038715) with PROSPERO (International Prospective Register of Systematic  
22 Reviews).[23, 24]  
23  
24

### 25 26 27 **2.2 Patient Involvement**

28 Patients were not engaged in the development of this protocol.  
29

### 30 31 **2.3 Search Strategy**

32 A comprehensive search strategy was developed with an experienced health science  
33 librarian (MS). The search strategy for published studies was developed in the PubMed  
34 database, and comprised of keywords and MEDLINE controlled vocabulary or “medical  
35 subject headings”. A methodological search filter was applied to identify RCTs[25] and the  
36 search was limited to English language publications. This search strategy served as a  
37 template for additional search strategies tailored to other databases, including the Cochrane  
38 Library, EMBASE and International Pharmaceutical Abstracts. In addition, the reference lists  
39 of topical review articles, editorials, and included studies were hand-searched to identify other  
40 potentially relevant studies. A list of search terms is provided in Section 1 of the Online  
41 Appendix.  
42  
43  
44  
45

46 The search for unpublished studies and materials included ProQuest Dissertations &  
47 Theses Global (ProQuest), and clinical trial registries (ClinicalTrials.gov). Inclusion of  
48 unpublished data from the FDA has been shown to substantially impact the effect estimates  
49 of meta-analyses of drug trials.[26]  
50  
51

### 52 53 **2.4 Eligibility Criteria**

54  
55 We included RCTs with a study population consisting of patients 18 years of age and  
56 older with a diagnosis of type 2 diabetes. Studies were required to have a formal definition of  
57  
58

1  
2 type 2 diabetes based on established diagnostic criteria during the time of the study. No  
3 restriction was applied with respect to history of diabetes medication use. One of the RCT  
4 study groups was required to be one of the following SGLT2 inhibitors: canagliflozin,  
5 dapagliflozin, empagliflozin, ipragliflozin or any other investigational or approved SGLT2  
6 inhibitor during study period. Eligible comparators included a different SGLT2 inhibitor,  
7 metformin, second-generation sulfonylureas (glyburide, gliclazide, glimepiride, glipizide –first  
8 generation sulfonylureas excluded as they are currently not used in clinical practice), basal  
9 insulins (NPH, lente, glargine, detemir, degludec), dipeptidyl peptidase-4 Inhibitors (DPP-4I)  
10 (alogliptin, linagliptin, saxagliptin, sitagliptin), GLP-1 agonists (dulaglutide, exenatide,  
11 liraglutide), thiazolidinediones (TZDs) (pioglitazone, rosiglitazone), alpha-glucosidase  
12 Inhibitors (acarbose) or placebo/no treatment. All premixed or acute care insulin protocols  
13 were excluded. Any investigational agents other than SGLT-2 inhibitors were excluded.  
14  
15  
16  
17  
18

19 The primary outcomes of this study are the serious safety events as highlighted through the  
20 federal regulatory drug safety communications.[6–11] These include: AKI, DKA, UTI, bone  
21 fractures, and lower limb amputations.  
22  
23

24 Studies were eligible regardless of duration of follow-up, or publication date; however, non-  
25 English citations were excluded. Language restriction does not appear to bias estimates of  
26 therapeutic interventions.[27, 28]  
27  
28

## 29 **2.5 Study Selection and Data Extraction**

30  
31 We used DistillerSR, a systematic review software,[29] for screening and data  
32 extraction. Studies went through a two-level screening process. First, titles and abstracts  
33 were reviewed using the inclusion and exclusion criteria. Any studies that meet those criteria,  
34 or where a clear decision could not be made, moved to second level screening. At level two  
35 screening, full text articles were retrieved and the same criteria applied. Duplicate screening  
36 was carried out using the “liberal accelerated” method at both level one and level two, which  
37 was first applied by Khangura.[30] This method involves having a second reviewer only  
38 evaluate studies that were deemed not relevant by the lead reviewer. This reduces the overall  
39 number of papers that require duplicate screening without increasing the risk of having  
40 appropriate studies inadvertently excluded.  
41  
42  
43  
44

45 Information extracted included study characteristics (country, definitions of exposure(s)  
46 and controls), patient characteristics (sex, age, duration of diabetes) and outcome data (a  
47 complete list of extracted variables is available in Section 2 of the online appendix). Where  
48 the data conflicted between the published paper and other sources (e.g. ClinicalTrials.gov),  
49 the data from the published paper were used. Data were only supplemented from other  
50 sources when gaps in information existed. In cases where more than one publication reported  
51 data on the same study, the most recent were used for data extraction. The exception to this  
52 rule was when there was a change to the intervention or comparator groups (e.g. drug, dose,  
53 etc.) for study extensions, then data from the original publication were used. Any  
54  
55  
56  
57  
58  
59

1  
2 disagreements were resolved through discussion and consensus. Where necessary, a third  
3 reviewer was consulted. All DistillerSR screening and extraction forms were created *a priori*  
4 and piloted using a small sample of eligible studies.  
5

## 6 7 **2.6 Risk of Bias Assessment**

8  
9 Each included study was critically appraised using the Cochrane Collaboration domain-  
10 based tool for assessing the risk of bias for RCTs.[31, 32] This tool captures six main  
11 sources of bias, including: randomization sequence, allocation concealment, blinding of  
12 participant and researcher, blinded outcome assessment, incomplete outcome data and  
13 selective reporting. A seventh category captures any other potential sources of bias. Bias was  
14 assessed at the study level. Low risk of bias was defined as an assessment on the risk of bias  
15 tool that included no more than two categories with “unclear risk”. Studies were defined as  
16 high risk if they had: three or more categories of “unclear risk”; one or more categories of  
17 “medium risk”; or one or more categories of “high risk”. Publication bias was examined using  
18 funnel plots.  
19  
20  
21  
22

## 23 **2.7 Data Synthesis**

24  
25 We conducted a pair-wise random effects meta-analysis to estimate the pooled  
26 treatment effect using relative risks. The primary analysis was split into two comparisons, with  
27 the first between SGLT2 inhibitors and placebo, and the second SGLT2 inhibitors and any  
28 active comparator. Between-study variance was estimated using the restricted maximum  
29 likelihood method. If there were zero events reported, a default value of 0.5 was added.  
30 Statistical heterogeneity was evaluated using the I<sup>2</sup> statistic, with significant heterogeneity  
31 defined as an I<sup>2</sup> > 75%. To explore treatment effect heterogeneity, we conducted numerous  
32 subgroup analyses according to individual SGLT2 inhibitors, risk of bias, and concurrent use  
33 of other diabetes medications. Concurrent/prior use was defined as any previous use of anti-  
34 diabetic agents that were used prior to enrollment or added as background therapy after  
35 enrollment. If patients could be therapy-naïve or have used other medications to meet  
36 enrollment criteria, then they were categorized as concurrent/prior use. Treatment-naïve was  
37 defined as patients that: have never had an anti-diabetic medication in the past, have not  
38 been on any other anti-diabetic medication in weeks leading up to enrolment, or, were able to  
39 go through a washout prior to enrolment. We also conducted sensitivity analyses to explore  
40 the impact of methodologic decisions within our analysis. First, we pooled studies that had at  
41 least one reported event. Second, we repeated our analyses using fixed-effects models. All  
42 analysis was conducted using R statistical software (version 3.4.1). Technical appendix,  
43 statistical code, and dataset available from the corresponding author.  
44  
45  
46  
47  
48  
49  
50  
51  
52

## 53 **3.0 Results**

### 54 **3.1 Included Studies**

1  
2 A total of 1865 unique titles and abstracts were screened. Of these, 568 proceeded to  
3 full text screening. A total of 129 citations met our inclusion criteria, however 30 were  
4 excluded at the data extraction phase due to duplication of data, from the publication of  
5 extension studies or post-hoc analyses. A final total of 99 publications were included,[3, 33–  
6 124] representing 102 randomized populations (Figure 1). Three publications[45, 52, 119]  
7 reported on multiple unique populations. Most studies included one of the four marketed  
8 SGLT2 inhibitors, dapagliflozin (31 studies), canagliflozin (20 studies), empagliflozin (25  
9 studies) and ipragliflozin (10 studies); while 16 studies included one of five non-marketed  
10 agents. With respect to comparators, 4 conducted within-class comparisons, 85 compared to  
11 placebo, 8 compared to metformin, 9 compared to an incretin agent, 4 compared to a  
12 sulfonylurea, and 2 compared to pioglitazone. A total of 9 studies included more than one  
13 unique comparator. Section 3 of the Online Appendix outlines the characteristics of each of  
14 the included studies.  
15  
16  
17  
18  
19  
20

## 21 3.2 Primary Analysis

### 22 *Acute Kidney Injury*

23  
24 Acute kidney injury was reported in 10 RCTs (8 placebo comparison, and 2 active  
25 comparison trials): meta-analysis was only possible with placebo-controlled trials. Overall  
26 SGLT2 inhibitors were found to have a protective effect (RR 0.59; 95% CI 0.39-0.89,  $I^2 =$   
27 0.0%), however this estimate is heavily weighted by one study using empagliflozin, the  
28 EMPA-REG trial (Figure 2).[125] Pooled estimate after removing the EMPA-REG trial was  
29 non-significant (RR 0.48; 95% CI 0.14-1.64;  $I^2 = 0.0%$ ).  
30  
31  
32  
33

### 34 *Diabetic Ketoacidosis*

35  
36 Diabetic ketoacidosis was reported in 21 RCTs (16 Placebo comparison, 5 active  
37 comparisons, and 1 within class comparison trial). Neither placebo (RR 0.65; 95% CI 0.28-  
38 1.50,  $I^2 = 0.0%$ ) (Figure 3) nor incretin (RR 0.43; 95% CI 0.069-2.75;  $I^2 = 0.0%$ ; 3 Studies)  
39 (Forest plot, online appendix Section 4) comparisons showed a significant difference in risk of  
40 DKA. Additional analysis using only placebo-controlled trials that had at least one event also  
41 yielded no significant difference (RR 0.73; 95% CI 0.25-2.16;  $I^2 = 0.0%$ ; 7 studies) (Forest  
42 plot, online appendix Section 4).  
43  
44  
45

### 46 *Urinary tract infections*

47  
48 Urinary tract infection was the most frequently reported outcome examined (101 of 102  
49 studies reported). When compared to placebo, SGLT2 inhibitors as a class did not  
50 demonstrate a significant increase risk (RR 1.03; 95% CI 0.96-1.10), however subgroup  
51 analysis of the individual agents did show a significantly increased risk of UTIs in users of  
52 dapagliflozin (RR 1.23; 1.03-1.46), but not empagliflozin, canagliflozin, ipragliflozin or non-  
53 marketed SGLT2 inhibitors (grouped) (Figure 4). When compared to active treatments,  
54 SGLT2 inhibitors grouped together did not demonstrate an increased risk of UTIs over  
55 metformin, sulfonylureas, incretins or glitazones (Figure 5), however when broken down by  
56  
57  
58  
59



1  
2 individual SGLT2 inhibitor, dapagliflozin showed an increased risk of UTI of active  
3 comparators grouped together (RR 1.42; 95% CI 1.07-1.87) (Forest plot, online appendix  
4 Section 4).  
5

### 6 7 *Bone Fracture*

8 Bone fracture was reported in 58 RCTs (45 placebo comparisons, 12 active  
9 comparison, and 2 within class comparisons). SGLT2 inhibitors were not found to have an  
10 increased risk of fractures over placebo (RR 0.86; 95% CI 0.67-1.09) (Figure 6), metformin  
11 (RR 0.69; 95% CI 0.19-2.51;  $I^2 = 0.0\%$ ; 6 studies), sulfonylureas (RR 1.13; 95% CI 0.64-2.01;  
12  $I^2 = 0.0\%$ ; 3 studies) or incretins (RR 1.14; 95% CI 0.20-6.39;  $I^2 = 0.0\%$ ; 3 studies). A sub-  
13 group analysis of canagliflozin compared to placebo alone, the agent identified by the FDA as  
14 having an increased risk, was also non-significant (RR 1.02; 95% CI 0.63-1.65;  $I^2 = 0.0\%$ ; 12  
15 studies) (Additional forest plots, online appendix Section 4).  
16  
17  
18  
19

### 20 21 *Lower Limb Amputation*

22 No studies reported on the outcome of lower limb amputation.  
23  
24

## 25 26 **3.2 Sub-group and Sensitivity Analyses**

27 Several sub-group analyses were conducted to examine: the impact of prior and  
28 concurrent use of other anti-diabetic agents; the influence of risk of bias as per the quality  
29 appraisal; and the impact of the definition of UTI used as outlined in Table 1. Overall these  
30 additional analyses did not change the findings of the primary analysis. There was a  
31 decreased risk of AKI in the treatment-naïve group, and the low risk of bias group, but this  
32 was consistent with the main analysis and driven by the same one large study.[125] When the  
33 analyses were re-run using a fixed-effect models, the risk estimates remained the same or  
34 had slightly smaller confidence intervals. Forest plots for the fixed effects analysis are in  
35 Section 5 of the online appendix.  
36  
37  
38  
39  
40

## 41 42 **3.3 Risk of bias**

43 Generally, studies were of good methodological quality, however numerous studies  
44 were deemed high risk of selective reporting after outcome data was retrieved from  
45 ClinicalTrials.gov that were not reported in the peer-reviewed publication (28%). Other  
46 potential sources of bias came from unclear reporting of methodological processes like  
47 randomization sequence (31%) or blinded outcome assessment (15%), while most sources of  
48 bias came from lack of blinding of the researchers and participants (11%) and of the outcome  
49 assessors (9%). Risk of bias assessment for individual studies are available in Section 6 of  
50 the online appendix. Funnel plots do not suggest of the presence of publication bias (see  
51 Section 7 of the Online Appendix).  
52  
53  
54  
55  
56  
57  
58  
59  
60

## 4.0 Discussion

This study provides a comprehensive review of the RCT literature with respect to key safety outcomes identified through post-marketing surveillance systems and communicated to health professionals and the public by drug regulators. We pooled outcome data from over 100 RCTs (including unpublished data only available through ClinicalTrials.gov) to quantify the association between SGLT2 inhibitors and AKI, DKA, UTI, and bone fracture. We found that SGLT2 inhibitors as a class are risk neutral with respect to DKA, UTI, and bone fracture, and may have a protective effect with respect to AKI, though this effect was heavily weighted by one large RCT. With respect to UTI, overall findings do not hold in subgroup analysis by individual drug, suggesting that increased risk of UTI is associated only with dapagliflozin.

Despite early indication of a protective effect from SGLT2 inhibitors on kidney function,[14] the FDA published in a safety communication in June 2016 that 101 cases of AKI were reported among users of canagliflozin and dapagliflozin.[11] SGLT2 inhibitors may provide a long-term protective effect on the kidneys via reduced trans-glomerular pressure, similar to the effects of agents that target the renin–angiotensin–aldosterone (RAAS) axis.[126] Szalat et al (2017) proposed in three possible mechanisms that might explain the potential for an increased risk of AKI with SGLT2 inhibitors as identified by the FDA, these are: 1) excessive diuresis leading to volume depletion, a particular concern for those who are hemodynamically unstable and volume-depleted; 2) a greater drop in trans-glomerular pressure due to the concomitant action of SGLT2 inhibition and RAAS blockade; and 3) renal medullary hypoxic injury, likely occurring in patients taking concomitant agents that impair medullary oxygenation (e.g. NSAIDs, radio-contrast dyes).[126] This systematic review is the first meta-analysis to address this outcome and highlights a lack of reporting of AKI with only 10 of 102 randomized comparisons having published data on this outcome. Though an overall protective effect was found, this finding was driven by one large RCT that compared empagliflozin to placebo. Evidence to support or refute the potential risk of AKI with use of canagliflozin or dapagliflozin was insufficient. Case reports filed with the FDA suggest that this adverse outcome frequently occurs early in therapy (within one month of initiation) and therefore this lack of reporting should not be due to the duration of clinical trials. Recent observational data also supports clinical trial data on AKI. Nadkarni et al. (2017) reported on the incidence of AKI among two cohorts comparing patients with type 2 diabetes using SGLT2 inhibitors to non-users.[127] After an average follow-up time of 14 months, adjusted hazard ratios showed SGLT2 inhibitors to be protective in one cohort (aHR 0.4 [95% CI 0.2–0.7]; P= 0.004) and favoring SGLT2 inhibitors, though not statistically significant, in the second cohort (aHR 0.6 [95% CI 0.4–1.1]; P= 0.09). These findings were not driven by users of empagliflozin, rather 91.2% and 71.4% of SGLT2 inhibitor users in these cohorts were taking either canagliflozin or dapagliflozin respectively.

An accurate assessment of the potential increased risk of DKA among users of SGLT2 inhibitors was difficult with the data reported within RCTs. Baseline incidence rates of DKA in patients with type 2 diabetes was found to be 1.34 per 1,000 person-years in a 20 year



1  
2 retrospective Danish cohort study, with declining incidence each year.[128] Therefore, most  
3 RCTs had insufficient sample size to detect any cases. Of the 16 RCTs that reported DKA,  
4 only 7 (representing 11,004 patients) had one or more cases. Our findings are consistent with  
5 published observational literature, which indicates no increased risk, however confidence  
6 intervals were wide. A case-control study using Truven MarketScan data (a large US claims  
7 database),[129] and a cross-sectional using the FDA Adverse Event Reporting System  
8 (FAERS) database[130] examining this issue have recently been published. Both studies  
9 used DPP-4 inhibitors as the active comparator given they have no known risk for DKA and  
10 are used in a similar fashion as second line therapy in type 2 diabetes, and both showed  
11 significant increased risk with SGLT2 inhibitors (Case-Control: 7-fold increased risk among  
12 140,352 patients; cross-sectional: HR 2.2; 95% CI 1.4-3.6, among 416,670). In contrast, the  
13 Danish cohort study did not find an increased risk of DKA in individuals taking SGLT2  
14 inhibitors compared to other diabetes therapies (HR 1.6; 95% CI 0.6-3.5), although the upper  
15 bound of the 95% confidence interval does not rule out significant harm.[128] No meta-  
16 analyses assessing this outcome were found.  
17  
18  
19  
20  
21  
22

23 Given the mechanism of action of the SGLT2 inhibitors, which work by inhibiting  
24 glucose reabsorption in the kidney leading to increase glucose excretion in the urine, an  
25 increased risk of UTI is plausible. In May 2015 the FDA reported in a safety update that 19  
26 cases of life-threatening kidney or blood infections that originated as a UTI had been  
27 identified in patients taking a SGLT2 inhibitor. However, a meta-analysis published in 2017,  
28 which is the largest to date, included 77 RCTs representing 50,820 patients and found no  
29 increased risk of UTIs in SGLT2 inhibitor users (RR 1.05; 95% CI 0.98-1.12).[16] The  
30 previous meta-analysis limited inclusion to studies of at least 24 weeks and having a full text  
31 publication. Our study findings are consistent and add to the literature via the inclusion of 25  
32 more studies, resulting in a more precise effect estimate. Importantly, subgroup analysis of  
33 individual SGLT2 inhibitors suggest variation of UTI risk within class whereby dapagliflozin  
34 may increase UTI risk when compared to both placebo and active controls. A reasonable  
35 biologic mechanism for an increased risk of UTIs among dapagliflozin users is unclear.  
36  
37  
38  
39  
40  
41

42 In January 2016, the FDA issued an expanded warning regarding a potential increased  
43 risk for fracture with canagliflozin.[8] A disruption in calcium-phosphate homeostasis is one  
44 potentially contributing mechanism.[18] In an RCT conducted by Bode et al. (2015), additional  
45 investigation into the change in bone mineral density in canagliflozin versus placebo users  
46 was conducted.[39] Their results showed a decreased placebo-corrected bone mineral  
47 density in the canagliflozin users at 2 years of 0.9-1.2% at the hip, 0.3-0.7% at the lumbar  
48 spine, 0.5% at the femoral neck, and 0.4% at the distal forearm. To date, two meta-analyses  
49 have been published examining the risk of fracture when comparing SGLT2 inhibitors to  
50 placebo[18, 19]. Ruanpeng et al (2017) included 20 RCTs, and Tang et al (2016) included 38  
51 RCTs. Neither meta-analysis in pooled or subgroup analysis of individual SGLT2 inhibitors  
52 demonstrated a significant increased risk of fracture. A pooled analysis of eight canagliflozin  
53 RCTs also found no increased risk.[20] The results of this current study support the existing  
54  
55  
56  
57  
58  
59  
60

1  
2 literature, demonstrating risk neutrality, with the addition of new RCT literature (a total of 58  
3 RCTs, 45 of which were placebo controlled).  
4  
5

#### 6 7 **4.1 Limitations**

8 Although we conducted a comprehensive systematic review of RCTs of SGLT2  
9 inhibitors, there are still limitations to be considered when interpreting our findings. First, our  
10 review focused on select adverse events and excluded any benefits. Though this narrows the  
11 focus and requires the consideration of additional literature to make clinical decisions on  
12 appropriate use of SGLT2 inhibitors, it also provides a succinct and in-depth assessment of  
13 the unexpected adverse effects that have been reported post-market. Secondly, several of  
14 the outcomes (e.g., AKI, DKA, limb amputations) we evaluated occur infrequently and, in  
15 some cases, were not reported at all. Thirdly, certain outcomes may have been inadequately  
16 characterized within study reports. For example, while UTIs were commonly reported among  
17 RCTs included in this meta-analysis, data on complicated versus uncomplicated infections  
18 were not. The FDA highlighted 19 cases of life-threatening infections stemming from UTIs. It  
19 is possible that SGLT2 inhibitors play a role in the progression of UTI to more complicated  
20 clinical outcomes. Fourth, the limited duration of included RCTs (36% of studies were less  
21 than 24 weeks and 63% less than one year) precludes the estimation of long-term effects of  
22 SGLT2 inhibitors. This may be important in case of declining bone integrity. Finally, it was  
23 difficult to accurately assess the methodological quality of the included studies given the fact  
24 we were examining secondary and rarely reported outcomes. It has been noted that  
25 traditional quality appraisal forms are not always well suited to systematic reviews of adverse  
26 events. This is due to the fact that sometimes data adverse effects may be collected after  
27 allocation is known, or through self-assessment questionnaires.[131]  
28  
29  
30  
31  
32  
33  
34  
35

#### 36 37 **5.0 Conclusion**

38  
39 Despite the growing body of evidence on the new SGLT2 inhibitors, there remains minimal  
40 evidence demonstrating the comparative safety with respect to the more serious and  
41 unexpected outcomes. Current evidence from RCTs does not suggest an increased risk of  
42 harm with SGLT2 inhibitors, as a class, over placebo or active comparators with respect to  
43 the AKI, DKA, UTI or fracture. There appears to be treatment effect heterogeneity for the risk  
44 of UTI among specific SGLT2 inhibitors. Larger sample sizes and more long-term evidence,  
45 including observational studies, is needed to refine our estimates of the risk of AKI, DKA,  
46 fracture and amputation among SGLT2 inhibitor users.  
47  
48  
49  
50  
51

52 **Acknowledgements:** JRD holds a Fellowship from the Canadian Institutes of Health  
53 Research. JMG is supported by a New Investigator Award from the Canadian Institute of  
54 Health Research and a Clinician Scientist Award from the Canadian Diabetes Association.  
55  
56  
57  
58  
59

1  
2  
3  
4  
5  
6  
7  
8  
9  
10  
11  
12  
13  
14  
15  
16  
17  
18  
19  
20  
21  
22  
23  
24  
25  
26  
27  
28  
29  
30  
31  
32  
33  
34  
35  
36  
37  
38  
39  
40  
41  
42  
43  
44  
45  
46  
47  
48  
49  
50  
51  
52  
53  
54  
55  
56  
57  
58  
59  
60

**Funding Source:** This work was supported by the Newfoundland and Labrador Centre for Applied Health Research.

**Conflicts of Interest:** None

For peer review only

**Author Statements:**

*Jennifer R. Donnan* led the review and was involved at every stage, including protocol development, search strategy design, screening, data extraction, quality appraisal, analysis and manuscript preparation.

*Catherine Grandy* was involved in screening, data extraction, quality appraisal and manuscript revisions and final approval.

*Eugene Chibrikov* was involved in data cleaning and analysis, manuscript revisions and final approval.

*Carlo A. Marra* was involved in project conception, protocol development and manuscript revisions and final approval.

*Kris Aubrey-Bassler* was involved in project conception, protocol development and manuscript revisions and final approval.

*Karissa Johnston* was involved in project conception, protocol development and manuscript revisions and final approval.

*Mehdi Najafzadeh* was involved in project conception, protocol development and manuscript revisions and final approval.

*Michelle Swab* was involved in search strategy design, literature search, and manuscript revisions and final approval.

*Jenna Hache* was involved in screening, data extraction, quality appraisal and manuscript revisions and final approval.

*Daniel Curnew* was involved in screening, data extraction, quality appraisal and manuscript revisions and final approval.

*Hai Nguyen* was involved in interpretation of study results, manuscript revisions, and final approval.

*John-Michael Gamble* supervised this research and was involved in protocol development, consensus on disagreements in data extraction, data analysis, interpretation of results, manuscript revisions and final approval.

## References

1. Canadian Diabetes Association. 2016 Interim Update to the Guidelines: Update to the Pharmacologic Management of Type 2 Diabetes [Internet]. 2016. Available from: <http://guidelines.diabetes.ca/2016update>
2. American Diabetes Association. 2016 American Diabetes Association (ADA) Diabetes Guidelines Summary Recommendations from NDEI 1 2016 American Diabetes Association (ADA) Diabetes Guidelines Summary Recommendations from NDEI [Internet]. 2016. Available from: [http://www.ndei.org/uploadedFiles/Common/NDEI/Treatment\\_Guidelines/ADA%202015%20Summary%20PDF.pdf](http://www.ndei.org/uploadedFiles/Common/NDEI/Treatment_Guidelines/ADA%202015%20Summary%20PDF.pdf)
3. Zinman B, Wanner C, Lachin JM, Fitchett D, Bluhmki E, Hantel S, et al. Empagliflozin, Cardiovascular Outcomes, and Mortality in Type 2 Diabetes. *N Engl J Med*. 2015 Sep 17;
4. Marso SP, Daniels GH, Brown-Frandsen K, Kristensen P, Mann JFE, Nauck MA, et al. Liraglutide and Cardiovascular Outcomes in Type 2 Diabetes. *N Engl J Med*. 2016 28;375(4):311–22.
5. Marso SP, Bain SC, Consoli A, Eliaschewitz FG, Jódar E, Leiter LA, et al. Semaglutide and Cardiovascular Outcomes in Patients with Type 2 Diabetes. *N Engl J Med*. 2016 10;375(19):1834–44.
6. Health Canada. Summary Safety Review - Sodium Glucose Cotransporter 2 (SGLT2) Inhibitors INVOKANA (canagliflozin) and FORXIGA (dapagliflozin) - Evaluation of a Potential Risk of Acute Kidney Injury [Internet]. 2015 [cited 2015 Dec 10]. Available from: <http://www.hc-sc.gc.ca/dhp-mps/medeff/reviews-examens/sglt2-eng.php>
7. Health Canada. Forxiga, Invokana: Health Canada begins safety review of diabetes drugs known as SGLT2 inhibitors and risk of ketoacidosis [Internet]. [cited 2015 Dec 10]. Available from: <http://healthycanadians.gc.ca/recall-alert-rappel-avis/hc-sc/2015/53892a-eng.php>
8. Center for Drug Evaluation and Research. FDA Drug Safety Communication: FDA revises label of diabetes drug canagliflozin (Invokana, Invokamet) to include updates on bone fracture risk and new information on decreased bone mineral density [Internet]. [cited 2015 Dec 10]. Available from: <http://www.fda.gov/Drugs/DrugSafety/ucm461449.htm>
9. Center for Drug Evaluation and Research. FDA Drug Safety Communication: FDA revises labels of SGLT2 inhibitors for diabetes to include warnings about too much acid in the blood and serious urinary tract infections [Internet]. [cited 2015 Dec 10]. Available from: <http://www.fda.gov/Drugs/DrugSafety/ucm475463.htm>
10. Research C for DE and. Drug Safety and Availability - FDA Drug Safety Communication: FDA confirms increased risk of leg and foot amputations with the diabetes medicine canagliflozin (Invokana, Invokamet, Invokamet XR) [Internet]. [cited 2017 Dec 20]. Available from: <https://www.fda.gov/Drugs/DrugSafety/ucm557507.htm>
11. Research C for DE and. Drug Safety and Availability - FDA Drug Safety Communication: FDA strengthens kidney warnings for diabetes medicines canagliflozin (Invokana, Invokamet) and dapagliflozin (Farxiga, Xigduo XR) [Internet]. [cited 2017 Dec 12]. Available from: <https://www.fda.gov/Drugs/DrugSafety/ucm505860.htm>

12. European Medicines Agency - News and Events - SGLT2 inhibitors: information on potential risk of toe amputation to be included in prescribing information [Internet]. European Medicines Agency. [cited 2018 Feb 6]. Available from: [http://www.ema.europa.eu/ema/index.jsp?curl=pages/news\\_and\\_events/news/2017/02/news\\_detail\\_002699.jsp&mid=WC0b01ac058004d5c1](http://www.ema.europa.eu/ema/index.jsp?curl=pages/news_and_events/news/2017/02/news_detail_002699.jsp&mid=WC0b01ac058004d5c1)
13. EMA confirms recommendations to minimise ketoacidosis risk with SGLT2 inhibitors for diabetes [Internet]. European Medicines Agency. 2016 [cited 2018 Feb 6]. Available from: [http://www.ema.europa.eu/ema/index.jsp?curl=pages/medicines/human/referrals/SGLT2\\_inhibitors/human\\_referral\\_prac\\_000052.jsp&mid=WC0b01ac05805c516f](http://www.ema.europa.eu/ema/index.jsp?curl=pages/medicines/human/referrals/SGLT2_inhibitors/human_referral_prac_000052.jsp&mid=WC0b01ac05805c516f)
14. Liu J, Li L, Li S, Jia P, Deng K, Chen W, et al. Effects of SGLT2 inhibitors on UTIs and genital infections in type 2 diabetes mellitus: a systematic review and meta-analysis. *Sci Rep*. 2017 Jun 6;7(1):2824.
15. Ruanpeng D, Ungprasert P, Sangtian J, Harindhanavudhi T. Sodium-glucose cotransporter 2 (SGLT2) inhibitors and fracture risk in patients with type 2 diabetes mellitus: A meta-analysis. *Diabetes Metab Res Rev*. 2017 Sep;33(6).
16. Tang HL, Li DD, Zhang JJ, Hsu YH, Wang TS, Zhai SD, et al. Lack of evidence for a harmful effect of sodium-glucose co-transporter 2 (SGLT2) inhibitors on fracture risk among type 2 diabetes patients: a network and cumulative meta-analysis of randomized controlled trials. *Diabetes Obes Metab*. 2016;18(12):1199–206.
17. Watts NB, Bilezikian JP, Usiskin K, Edwards R, Desai M, Law G, et al. Effects of Canagliflozin on Fracture Risk in Patients With Type 2 Diabetes Mellitus. *J Clin Endocrinol Metab*. 2016 Jan;101(1):157–66.
18. Fioretto P, Zambon A, Rossato M, Busetto L, Vettor R. SGLT2 Inhibitors and the Diabetic Kidney. *Diabetes Care*. 2016 Aug;39 Suppl 2:S165-171.
19. Neal B, Perkovic V, Mahaffey KW, de Zeeuw D, Fulcher G, Erondou N, et al. Canagliflozin and Cardiovascular and Renal Events in Type 2 Diabetes. *N Engl J Med*. 2017 17;377(7):644–57.
20. Moher D, Liberati A, Tetzlaff J, Altman DG. Preferred reporting items for systematic reviews and meta-analyses: the PRISMA statement. *Ann Intern Med*. 2009;151(4):264–269.
21. Gamble J-M, Conway A, Myers KJ, Agnew MD, Hatch K, Snow MM, et al. Incretin based drugs for type 2 diabetes: an overview of systematic reviews. PROSPERO. 2013;CRD42013005149.
22. Price HI, Agnew M, Gamble J. Comparative cardiovascular morbidity and mortality in patients taking different insulin regimens for type 2 diabetes: a systematic review [Internet]. 2014. Report No.: CRD42014007631. Available from: [http://www.crd.york.ac.uk/prospero/display\\_record.asp?ID=CRD42014007631#.U4YdqijAPel](http://www.crd.york.ac.uk/prospero/display_record.asp?ID=CRD42014007631#.U4YdqijAPel)
23. Cochrane Handbook for Systematic Reviews of Interventions Version 5.1.0 [Internet]. Cochrane Collaboration; 2011. Available from: <http://handbook-5-1.cochrane.org/>
24. Hart B, Lundh A, Bero L. Effect of reporting bias on meta-analyses of drug trials: reanalysis of meta-analyses. *BMJ*. 2012 Jan 3;344(jan03 1):d7202–d7202.
25. Moher D, Klassen T, Schulz K, Berlin J, Jadad A, Liberati A. What contributions do languages other than English make on the results of meta-analyses? *J Clin Epidemiol*.



1  
2 2000;53(9):964–72.

3 26. Morrison A, Polisena J, Husereau D, Moulton K, Clark M, Fiander M, et al. The effect  
4 of English-language restriction on systematic review-based meta-analyses: a systematic  
5 review of empirical studies. *Int J Technol Assess Health Care*. 2012 Apr;28(2):138–44.

6 27. DistillerSR. Ottawa, Canada: Evidence Partners;

7 28. Khangura S, Konnyu K, Cushman R, Grimshaw J, Moher D. Evidence summaries: the  
8 evolution of a rapid review approach. *Syst Rev*. 2012;1:10.

9 29. Higgins JPT, Altman DG, Gøtzsche PC, Jüni P, Moher D, Oxman AD, et al. The  
10 Cochrane Collaboration's tool for assessing risk of bias in randomised trials. *BMJ*.  
11 2011;343:d5928.

12 30. Sterne J, Higgins J, Reeves B, on behalf of the development group for ACROBAT-  
13 NRSI. A Cochrane Risk of Bias Assessment Tool: for Non-Randomized Studies of  
14 Interventions (ACROBAT-NRSI), Version 1.0.0. [Internet]. 2014 [cited 2015 Dec 11]. Available  
15 from: Available from <http://www.riskofbias.info>

16 31. Amin NB, Wang X, Mitchell JR, Lee DS, Nucci G, Rusnak JM. Blood pressure-lowering  
17 effect of the sodium glucose co-transporter-2 inhibitor ertugliflozin, assessed via ambulatory  
18 blood pressure monitoring in patients with type 2 diabetes and hypertension. *Diabetes Obes  
19 Metab*. 2015 Aug;17(8):805–8.

20 32. Amin NB, Wang X, Jain SM, Lee DS, Nucci G, Rusnak JM. Dose-ranging efficacy and  
21 safety study of ertugliflozin, a sodium-glucose co-transporter 2 inhibitor, in patients with type 2  
22 diabetes on a background of metformin. *Diabetes Obes Metab*. 2015;17(6):591–598.

23 33. Araki E, Onishi Y, Asano M, Kim H, Ekholm E, Johnsson E, et al. Efficacy and safety of  
24 dapagliflozin in addition to insulin therapy in Japanese patients with type 2 diabetes: Results  
25 of the interim analysis of 16-week double-blind treatment period. *J Diabetes Investig*. 2016  
26 Jul;7(4):555–64.

27 34. Araki E, Tanizawa Y, Tanaka Y, Taniguchi A, Koiwai K, Kim G, et al. Long-term  
28 treatment with empagliflozin as add-on to oral antidiabetes therapy in Japanese patients with  
29 type 2 diabetes mellitus. *Diabetes Obes Metab*. 2015 Jul;17(7):665–74.

30 35. Bailey CJ, Iqbal N, T'joen C, List JF. Dapagliflozin monotherapy in drug-naïve patients  
31 with diabetes: a randomized-controlled trial of low-dose range. *Diabetes Obes Metab*.  
32 2012;14(10):951–959.

33 36. Barnett AH, Mithal A, Manassie J, Jones R, Rattunde H, Woerle HJ, et al. Efficacy and  
34 safety of empagliflozin added to existing antidiabetes treatment in patients with type 2  
35 diabetes and chronic kidney disease: a randomised, double-blind, placebo-controlled trial.  
36 *Lancet Diabetes Endocrinol*. 2014 May;2(5):369–84.

37 37. Bode B, Stenlöf K, Harris S, Sullivan D, Fung A, Usiskin K, et al. Long-term efficacy  
38 and safety of canagliflozin over 104 weeks in patients aged 55-80 years with type 2 diabetes.  
39 *Diabetes Obes Metab*. 2015 Mar;17(3):294–303.

40 38. Bolinder J, Ljunggren Ö, Johansson L, Wilding J, Langkilde AM, Sjöström CD, et al.  
41 Dapagliflozin maintains glycaemic control while reducing weight and body fat mass over 2  
42 years in patients with type 2 diabetes mellitus inadequately controlled on metformin. *Diabetes  
43 Obes Metab*. 2014;16(2):159–169.

- 1  
2 39. Cefalu WT, Leiter LA, de Bruin TWA, Gause-Nilsson I, Sugg J, Parikh SJ. Dapagliflozin's Effects on Glycemia and Cardiovascular Risk Factors in High-Risk Patients  
3 With Type 2 Diabetes: A 24-Week, Multicenter, Randomized, Double-Blind, Placebo-  
4 Controlled Study With a 28-Week Extension. *Diabetes Care*. 2015 Jul;38(7):1218–27.
- 5  
6 40. Chang C-H, Lin J-W, Chen S-T, Lai M-S, Chuang L-M, Chang Y-C. Dipeptidyl  
7 Peptidase-4 Inhibitor Use Is Not Associated With Acute Pancreatitis in High-Risk Type 2  
8 Diabetic Patients: A Nationwide Cohort Study. *Medicine (Baltimore)*. 2016 Feb;95(7):e2603.
- 9  
10 41. DeFronzo RA, Lewin A, Patel S, Liu D, Kaste R, Woerle HJ, et al. Combination of  
11 Empagliflozin and Linagliptin as Second-Line Therapy in Subjects With Type 2 Diabetes  
12 Inadequately Controlled on Metformin. *Diabetes Care*. 2015 Mar;38(3):384–93.
- 13  
14 42. Del Prato S, Nauck M, Duran-Garcia S, Maffei L, Rohwedder K, Theuerkauf A, et al.  
15 Long-term glycaemic response and tolerability of dapagliflozin versus a sulphonylurea as add-  
16 on therapy to metformin in patients with type 2 diabetes: 4-year data. *Diabetes Obes Metab*.  
17 2015;17(6):581–590.
- 18  
19 43. Ferrannini E, Berk A, Hantel S, Pinnetti S, Hach T, Woerle HJ, et al. Long-Term Safety  
20 and Efficacy of Empagliflozin, Sitagliptin, and Metformin: An active-controlled, parallel-group,  
21 randomized, 78-week open-label extension study in patients with type 2 diabetes. *Diabetes*  
22 *Care*. 2013 Dec 1;36(12):4015–21.
- 23  
24 44. Ferrannini E, Ramos SJ, Salsali A, Tang W, List JF. Dapagliflozin Monotherapy in  
25 Type 2 Diabetic Patients With Inadequate Glycemic Control by Diet and Exercise: A  
26 randomized, double-blind, placebo-controlled, phase 3 trial. *Diabetes Care*. 2010 Oct  
27 1;33(10):2217–24.
- 28  
29 45. Fonseca VA, Ferrannini E, Wilding JP, Wilpshaar W, Dhanjal P, Ball G, et al. Active-  
30 and placebo-controlled dose-finding study to assess the efficacy, safety, and tolerability of  
31 multiple doses of ipragliflozin in patients with type 2 diabetes mellitus. *J Diabetes*  
32 *Complications*. 2013 May;27(3):268–73.
- 33  
34 46. Hadjadj S, Rosenstock J, Meinicke T, Woerle HJ, Broedl UC. Initial Combination of  
35 Empagliflozin and Metformin in Patients With Type 2 Diabetes. *Diabetes Care*. 2016  
36 Oct;39(10):1718–28.
- 37  
38 47. Haering H-U, Merker L, Christiansen AV, Roux F, Salsali A, Kim G, et al. Empagliflozin  
39 as add-on to metformin plus sulphonylurea in patients with type 2 diabetes. *Diabetes Res Clin*  
40 *Pract*. 2015 Oct;110(1):82–90.
- 41  
42 48. Heise T, Seewaldt-Becker E, Macha S, Hantel S, Pinnetti S, Seman L, et al. Safety,  
43 tolerability, pharmacokinetics and pharmacodynamics following 4 weeks' treatment with  
44 empagliflozin once daily in patients with type 2 diabetes. *Diabetes Obes Metab*. 2013  
45 Jul;15(7):613–21.
- 46  
47 49. Heise T, Seman L, Macha S, Jones P, Marquart A, Pinnetti S, et al. Safety, Tolerability,  
48 Pharmacokinetics, and Pharmacodynamics of Multiple Rising Doses of Empagliflozin in  
49 Patients with Type 2 Diabetes Mellitus. *Diabetes Ther*. 2013 Dec;4(2):331–45.
- 50  
51 50. Henry RR, Murray AV, Marmolejo MH, Hennicken D, Ptaszynska A, List JF.  
52 Dapagliflozin, metformin XR, or both: initial pharmacotherapy for type 2 diabetes, a  
53 randomised controlled trial: T2DM: dapagliflozin, metformin XR, or both. *Int J Clin Pract*. 2012  
54  
55  
56  
57  
58  
59



1  
2 May;66(5):446–56.

3 51. Ikeda S, Takano Y, Cynshi O, Tanaka R, Christ AD, Boerlin V, et al. A novel and  
4 selective sodium-glucose cotransporter-2 inhibitor, tofogliflozin, improves glycaemic control  
5 and lowers body weight in patients with type 2 diabetes mellitus. *Diabetes Obes Metab*. 2015  
6 Oct;17(10):984–93.

7  
8 52. Inagaki N, Harashima S, Maruyama N, Kawaguchi Y, Goda M, Iijima H. Efficacy and  
9 safety of canagliflozin in combination with insulin: a double-blind, randomized, placebo-  
10 controlled study in Japanese patients with type 2 diabetes mellitus. *Cardiovasc Diabetol*  
11 [Internet]. 2016 Dec [cited 2017 Dec 15];15(1). Available from:  
12 <http://cardiab.biomedcentral.com/articles/10.1186/s12933-016-0407-4>

13  
14 53. Inagaki N, Kondo K, Yoshinari T, Kuki H. Efficacy and safety of canagliflozin alone or  
15 as add-on to other oral antihyperglycemic drugs in Japanese patients with type 2 diabetes: A  
16 52-week open-label study. *J Diabetes Investig*. 2015 Mar;6(2):210–8.

17  
18 54. Inagaki N, Kondo K, Yoshinari T, Maruyama N, Susuta Y, Kuki H. Efficacy and safety  
19 of canagliflozin in Japanese patients with type 2 diabetes: a randomized, double-blind,  
20 placebo-controlled, 12-week study. *Diabetes Obes Metab*. 2013;15(12):1136–1145.

21  
22 55. Inagaki N, Kondo K, Yoshinari T, Takahashi N, Susuta Y, Kuki H. Efficacy and safety  
23 of canagliflozin monotherapy in Japanese patients with type 2 diabetes inadequately  
24 controlled with diet and exercise: a 24-week, randomized, double-blind, placebo-controlled,  
25 Phase III study. *Expert Opin Pharmacother*. 2014 Aug;15(11):1501–15.

26  
27 56. Ishihara H, Yamaguchi S, Nakao I, Okitsu A, Asahina S. Efficacy and safety of  
28 ipragliflozin as add-on therapy to insulin in Japanese patients with type 2 diabetes mellitus  
29 (IOLITE): a multi-centre, randomized, placebo-controlled, double-blind study. *Diabetes Obes*  
30 *Metab*. 2016 Dec;18(12):1207–16.

31  
32 57. Jabbour SA, Hardy E. To assess the efficacy and safety of dapagliflozin as add-on  
33 therapy in patients with type 2 diabetes who were inadequately controlled with a dipeptidyl  
34 peptidase-4 inhibitor with or without metformin. *Diabetes Care*. 2014;37:740–750.

35  
36 58. Ji L, Han P, Liu Y, Yang G, Dieu Van NK, Vijapurkar U, et al. Canagliflozin in Asian  
37 patients with type 2 diabetes on metformin alone or metformin in combination with  
38 sulphonylurea. *Diabetes Obes Metab*. 2015;17(1):23–31.

39  
40 59. Ji L, Ma J, Li H, Mansfield TA, T'joen CL, Iqbal N, et al. Dapagliflozin as Monotherapy  
41 in Drug-Naive Asian Patients With Type 2 Diabetes Mellitus: A Randomized, Blinded,  
42 Prospective Phase III Study. *Clin Ther*. 2014 Jan;36(1):84–100.e9.

43  
44 60. Kadokura T, Akiyama N, Kashiwagi A, Utsuno A, Kazuta K, Yoshida S, et al.  
45 Pharmacokinetic and pharmacodynamic study of ipragliflozin in Japanese patients with type 2  
46 diabetes mellitus: A randomized, double-blind, placebo-controlled study. *Diabetes Res Clin*  
47 *Pract*. 2014 Oct;106(1):50–6.

48  
49 61. Kadowaki T, Haneda M, Inagaki N, Terauchi Y, Taniguchi A, Koiwai K, et al. Efficacy  
50 and Safety of Empagliflozin Monotherapy for 52 Weeks in Japanese Patients with Type 2  
51 Diabetes: A Randomized, Double-Blind, Parallel-Group Study. *Adv Ther*. 2015 Apr;32(4):306–  
52 18.

53  
54 62. Kaku K, Inoue S, Matsuoka O, Kiyosue A, Azuma H, Hayashi N, et al. Efficacy and  
55  
56  
57  
58  
59

1  
2 safety of dapagliflozin as a monotherapy for type 2 diabetes mellitus in Japanese patients  
3 with inadequate glycaemic control: a phase II multicentre, randomized, double-blind, placebo-  
4 controlled trial. *Diabetes Obes Metab*. 2013;15(5):432–440.

5  
6 63. Kaku K, Kiyosue A, Inoue S, Ueda N, Tokudome T, Yang J, et al. Efficacy and safety  
7 of dapagliflozin monotherapy in Japanese patients with type 2 diabetes inadequately  
8 controlled by diet and exercise. *Diabetes Obes Metab*. 2014;16(11):1102–1110.

9  
10 64. Kaku K, Watada H, Iwamoto Y, Utsunomiya K, Terauchi Y, Tobe K, et al. Efficacy and  
11 safety of monotherapy with the novel sodium/glucose cotransporter-2 inhibitor tofogliflozin in  
12 Japanese patients with type 2 diabetes mellitus: a combined Phase 2 and 3 randomized,  
13 placebo-controlled, double-blind, parallel-group comparative study. *Cardiovasc Diabetol*.  
14 2014;13(1):65.

15  
16 65. Kashiwagi A, Akiyama N, Shiga T, Kazuta K, Utsuno A, Yoshida S, et al. Efficacy and  
17 safety of ipragliflozin as an add-on to a sulfonylurea in Japanese patients with inadequately  
18 controlled type 2 diabetes: results of the randomized, placebo-controlled, double-blind, phase  
19 III EMIT study. *Diabetol Int*. 2015 Jun;6(2):125–38.

20  
21 66. Kashiwagi A, Kazuta K, Takinami Y, Yoshida S, Utsuno A, Nagase I. Ipragliflozin  
22 improves glycemic control in Japanese patients with type 2 diabetes mellitus: the BRIGHTEN  
23 study: BRIGHTEN: double-blind randomized study of ipragliflozin to show its efficacy as  
24 monotherapy in T2DM patients. *Diabetol Int*. 2015 Mar;6(1):8–18.

25  
26 67. Kashiwagi A, Kazuta K, Yoshida S, Nagase I. Randomized, placebo-controlled,  
27 double-blind glycemic control trial of novel sodium-dependent glucose cotransporter 2  
28 inhibitor ipragliflozin in Japanese patients with type 2 diabetes mellitus. *J Diabetes Investig*.  
29 2014 Jul;5(4):382–91.

30  
31 68. Kohan DE, Fioretto P, Tang W, List JF. Long-term study of patients with type 2  
32 diabetes and moderate renal impairment shows that dapagliflozin reduces weight and blood  
33 pressure but does not improve glycemic control. *Kidney Int*. 2014;85(4):962–971.

34  
35 69. Kovacs CS, Seshiah V, Merker L, Christiansen AV, Roux F, Salsali A, et al.  
36 Empagliflozin as Add-on Therapy to Pioglitazone With or Without Metformin in Patients With  
37 Type 2 Diabetes Mellitus. *Clin Ther*. 2015 Aug;37(8):1773–1788.e1.

38  
39 70. Lambers Heerspink HJ, De Zeeuw D, Wie L, Leslie B, List J. Dapagliflozin a glucose-  
40 regulating drug with diuretic properties in subjects with type 2 diabetes. *Diabetes Obes*  
41 *Metab*. 2013;15(9):853–862.

42  
43 71. Lavallo-González FJ, Januszewicz A, Davidson J, Tong C, Qiu R, Canovatchel W, et  
44 al. Efficacy and safety of canagliflozin compared with placebo and sitagliptin in patients with  
45 type 2 diabetes on background metformin monotherapy: a randomised trial. *Diabetologia*.  
46 2013 Dec;56(12):2582–92.

47  
48 72. Leiter LA, Cefalu WT, de Bruin TWA, Gause-Nilsson I, Sugg J, Parikh SJ. Dapagliflozin  
49 Added to Usual Care in Individuals with Type 2 Diabetes Mellitus with Preexisting  
50 Cardiovascular Disease: A 24-Week, Multicenter, Randomized, Double-Blind, Placebo-  
51 Controlled Study with a 28-Week Extension. *J Am Geriatr Soc*. 2014 Jul;62(7):1252–62.

52  
53 73. Leiter LA, Yoon K-H, Arias P, Langslet G, Xie J, Balis DA, et al. Canagliflozin Provides  
54 Durable Glycemic Improvements and Body Weight Reduction Over 104 Weeks Versus  
55  
56  
57  
58  
59

1  
2 Glimepiride in Patients With Type 2 Diabetes on Metformin: A Randomized, Double-Blind,  
3 Phase 3 Study. *Diabetes Care*. 2015 Mar;38(3):355–64.

4 74. Lewin A, DeFronzo RA, Patel S, Liu D, Kaste R, Woerle HJ, et al. Initial Combination of  
5 Empagliflozin and Linagliptin in Subjects With Type 2 Diabetes. *Diabetes Care*. 2015  
6 Mar;38(3):394–402.

7 75. List JF, Woo V, Morales E, Tang W, Fiedorek FT. Sodium-glucose cotransport  
8 inhibition with dapagliflozin in type 2 diabetes. *Diabetes Care*. 2009;32(4):650–657.

9 76. Mathieu C, Ranetti AE, Li D, Ekholm E, Cook W, Hirshberg B, et al. Randomized,  
10 Double-Blind, Phase 3 Trial of Triple Therapy With Dapagliflozin Add-on to Saxagliptin Plus  
11 Metformin in Type 2 Diabetes. *Diabetes Care*. 2015 Nov;38(11):2009–17.

12 77. Matthaei S, Bowering K, Rohwedder K, Sugg J, Parikh S, Johnsson E. Durability and  
13 tolerability of dapagliflozin over 52 weeks as add-on to metformin and sulphonylurea in type 2  
14 diabetes. *Diabetes Obes Metab*. 2015;17(11):1075–1084.

15 78. Mudaliar S, Henry RR, Boden G, Smith S, Chalamandaris A-G, Duchesne D, et al.  
16 Changes in Insulin Sensitivity and Insulin Secretion with the Sodium Glucose Cotransporter 2  
17 Inhibitor Dapagliflozin. *Diabetes Technol Ther*. 2014 Mar;16(3):137–44.

18 79. Nishimura R, Tanaka Y, Koiwai K, Inoue K, Hach T, Salsali A, et al. Effect of  
19 empagliflozin monotherapy on postprandial glucose and 24-hour glucose variability in  
20 Japanese patients with type 2 diabetes mellitus: a randomized, double-blind, placebo-  
21 controlled, 4-week study. *Cardiovasc Diabetol*. 2015;14(1):11.

22 80. Qiu R, Capuano G, Meininger G. Efficacy and safety of twice-daily treatment with  
23 canagliflozin, a sodium glucose co-transporter 2 inhibitor, added on to metformin  
24 monotherapy in patients with type 2 diabetes mellitus. *J Clin Transl Endocrinol*. 2014  
25 Jun;1(2):54–60.

26 81. Rodbard HW, Seufert J, Aggarwal N, Cao A, Fung A, Pfeifer M, et al. Efficacy and  
27 safety of titrated canagliflozin in patients with type 2 diabetes mellitus inadequately controlled  
28 on metformin and sitagliptin. *Diabetes Obes Metab*. 2016;18(8):812–819.

29 82. On behalf of the EMPA-REG EXTEND™ MONO investigators, Roden M, Merker L,  
30 Christiansen AV, Roux F, Salsali A, et al. Safety, tolerability and effects on cardiometabolic  
31 risk factors of empagliflozin monotherapy in drug-naïve patients with type 2 diabetes: a  
32 double-blind extension of a Phase III randomized controlled trial. *Cardiovasc Diabetol*  
33 [Internet]. 2015 Dec [cited 2017 Dec 15];14(1). Available from:  
34 <http://www.cardiab.com/content/14/1/154>

35 83. Rosenstock J, Aggarwal N, Polidori D, Zhao Y, Arbit D, Usiskin K, et al. Dose-Ranging  
36 Effects of Canagliflozin, a Sodium-Glucose Cotransporter 2 Inhibitor, as Add-On to Metformin  
37 in Subjects With Type 2 Diabetes. *Diabetes Care*. 2012 Jun 1;35(6):1232–8.

38 84. Rosenstock J, Cefalu WT, Lapuerta P, Zambrowicz B, Ogbaa I, Banks P, et al. Greater  
39 dose-ranging effects on A1C levels than on glucosuria with LX4211, a dual inhibitor of SGLT1  
40 and SGLT2, in patients with type 2 diabetes on metformin monotherapy. *Diabetes Care*. 2015  
41 Mar;38(3):431–8.

42 85. Rosenstock J, Hansen L, Zee P, Li Y, Cook W, Hirshberg B, et al. Dual Add-on  
43 Therapy in Type 2 Diabetes Poorly Controlled With Metformin Monotherapy: A Randomized  
44  
45  
46  
47  
48  
49  
50  
51  
52  
53  
54  
55  
56  
57  
58  
59  
60

- 1  
2 Double-Blind Trial of Saxagliptin Plus Dapagliflozin Addition Versus Single Addition of  
3 Saxagliptin or Dapagliflozin to Metformin. *Diabetes Care*. 2015 Mar;38(3):376–83.
- 4 86. Rosenstock J, Jelaska A, Zeller C, Kim G, Broedl UC, Woerle HJ. Impact of  
5 empagliflozin added on to basal insulin in type 2 diabetes inadequately controlled on basal  
6 insulin: a 78-week randomized, double-blind, placebo-controlled trial. *Diabetes Obes Metab*.  
7 2015;17(10):936–948.
- 8 87. Rosenstock J, Chuck L, González-Ortiz M, Merton K, Craig J, Capuano G, et al. Initial  
9 Combination Therapy With Canagliflozin Plus Metformin Versus Each Component as  
10 Monotherapy for Drug-Naïve Type 2 Diabetes. *Diabetes Care*. 2016 Mar;39(3):353–62.
- 11 88. Rosenstock J, Jelaska A, Frappin G, Salsali A, Kim G, Woerle HJ, et al. Improved  
12 Glucose Control With Weight Loss, Lower Insulin Doses, and No Increased Hypoglycemia  
13 With Empagliflozin Added to Titrated Multiple Daily Injections of Insulin in Obese Inadequately  
14 Controlled Type 2 Diabetes. *Diabetes Care*. 2014 Jul;37(7):1815–23.
- 15 89. Rosenstock J, Vico M, Wei L, Salsali A, List JF. Effects of Dapagliflozin, an SGLT2  
16 Inhibitor, on HbA1c, Body Weight, and Hypoglycemia Risk in Patients With Type 2 Diabetes  
17 Inadequately Controlled on Pioglitazone Monotherapy. *Diabetes Care*. 2012 Jul  
18 1;35(7):1473–8.
- 19 90. Ross S, Thamer C, Cescutti J, Meinicke T, Woerle HJ, Broedl UC. Efficacy and safety  
20 of empagliflozin twice daily versus once daily in patients with type 2 diabetes inadequately  
21 controlled on metformin: a 16-week, randomized, placebo-controlled trial. *Diabetes Obes  
22 Metab*. 2015;17(7):699–702.
- 23 91. Sasaki T, Seino Y, Fukatsu A, Ubukata M, Sakai S, Samukawa Y. Pharmacokinetics,  
24 Pharmacodynamics, and Safety of Luseogliflozin in Japanese Patients with Type 2 Diabetes  
25 Mellitus: A Randomized, Single-blind, Placebo-controlled Trial. *Adv Ther*. 2015  
26 Apr;32(4):319–40.
- 27 92. Schernthaner G, Gross JL, Rosenstock J, Guarisco M, Fu M, Yee J, et al. Canagliflozin  
28 Compared With Sitagliptin for Patients With Type 2 Diabetes Who Do Not Have Adequate  
29 Glycemic Control With Metformin Plus Sulfonylurea: A 52-week randomized trial. *Diabetes  
30 Care*. 2013 Sep;36(9):2508–15.
- 31 93. Schumm-Draeger P-M, Burgess L, Koranyi L, Hrubá V, Hamer-Maansson JE, de Bruin  
32 TWA. Twice-daily dapagliflozin co-administered with metformin in type 2 diabetes: a 16-week  
33 randomized, placebo-controlled clinical trial. *Diabetes Obes Metab*. 2015;17(1):42–51.
- 34 94. Seino Y, Sasaki T, Fukatsu A, Sakai S, Samukawa Y. Efficacy and safety of  
35 luseogliflozin monotherapy in Japanese patients with type 2 diabetes mellitus: a 12-week,  
36 randomized, placebo-controlled, phase II study. *Curr Med Res Opin*. 2014 Jul;30(7):1219–30.
- 37 95. Seino Y, Sasaki T, Fukatsu A, Ubukata M, Sakai S, Samukawa Y. Dose-finding study  
38 of luseogliflozin in Japanese patients with type 2 diabetes mellitus: a 12-week, randomized,  
39 double-blind, placebo-controlled, phase II study. *Curr Med Res Opin*. 2014 Jul;30(7):1231–44.
- 40 96. Seino Y, Sasaki T, Fukatsu A, Ubukata M, Sakai S, Samukawa Y. Efficacy and safety  
41 of luseogliflozin as monotherapy in Japanese patients with type 2 diabetes mellitus: a  
42 randomized, double-blind, placebo-controlled, phase 3 study. *Curr Med Res Opin*. 2014  
43 Jul;30(7):1245–55.
- 44  
45  
46  
47  
48  
49  
50  
51  
52  
53  
54  
55  
56  
57  
58  
59  
60



- 1  
2 97. Stenlöf K, Cefalu WT, Kim K-A, Alba M, Usiskin K, Tong C, et al. Efficacy and safety of  
3 canagliflozin monotherapy in subjects with type 2 diabetes mellitus inadequately controlled  
4 with diet and exercise. *Diabetes Obes Metab*. 2013;15(4):372–382.
- 5  
6 98. Strojek K, Yoon K-H, Hrubá V, Sugg J, Langkilde AM, Parikh S. Dapagliflozin Added to  
7 Glimperide in Patients with Type 2 Diabetes Mellitus Sustains Glycemic Control and Weight  
8 Loss Over 48 Weeks: A Randomized, Double-Blind, Parallel-Group, Placebo-Controlled Trial.  
9 *Diabetes Ther*. 2014 Jun;5(1):267–83.
- 10  
11 99. Sykes AP, O'Connor-Semmes R, Dobbins R, Dorey DJ, Lorimer JD, Walker S, et al.  
12 Randomized trial showing efficacy and safety of twice-daily remogliflozin etabonate for the  
13 treatment of type 2 diabetes. *Diabetes Obes Metab*. 2015;17(1):94–97.
- 14  
15 100. Tikkanen I, Narko K, Zeller C, Green A, Salsali A, Broedl UC, et al. Empagliflozin  
16 Reduces Blood Pressure in Patients With Type 2 Diabetes and Hypertension. *Diabetes Care*.  
17 2015 Mar;38(3):420–8.
- 18  
19 101. Townsend RR, Machin I, Ren J, Trujillo A, Kawaguchi M, Vijapurkar U, et al.  
20 Reductions in Mean 24-Hour Ambulatory Blood Pressure After 6-Week Treatment With  
21 Canagliflozin in Patients With Type 2 Diabetes Mellitus and Hypertension. *J Clin Hypertens*.  
22 2016 Jan;18(1):43–52.
- 23  
24 102. Wan Seman WJ, Kori N, Rajoo S, Othman H, Mohd Noor N, Wahab NA, et al.  
25 Switching from sulphonylurea to a sodium-glucose cotransporter2 inhibitor in the fasting  
26 month of Ramadan is associated with a reduction in hypoglycaemia. *Diabetes Obes Metab*.  
27 2016;18(6):628–632.
- 28  
29 103. Weber MA, Mansfield TA, Alessi F, Iqbal N, Parikh S, Ptaszynska A. Effects of  
30 dapagliflozin on blood pressure in hypertensive diabetic patients on renin–angiotensin system  
31 blockade. *Blood Press*. 2016 Mar 3;25(2):93–103.
- 32  
33 104. Weber MA, Mansfield TA, Cain VA, Iqbal N, Parikh S, Ptaszynska A. Blood pressure  
34 and glycaemic effects of dapagliflozin versus placebo in patients with type 2 diabetes on  
35 combination antihypertensive therapy: a randomised, double-blind, placebo-controlled, phase  
36 3 study. *Lancet Diabetes Endocrinol*. 2016;4(3):211–220.
- 37  
38 105. Wilding JPH, Charpentier G, Hollander P, González-Gálvez G, Mathieu C, Vercruyse  
39 F, et al. Efficacy and safety of canagliflozin in patients with type 2 diabetes mellitus  
40 inadequately controlled with metformin and sulphonylurea: a randomised trial. *Int J Clin Pract*.  
41 2013 Dec;67(12):1267–82.
- 42  
43 106. Wilding JPH, Ferrannini E, Fonseca VA, Wilpshaar W, Dhanjal P, Houzer A. Efficacy  
44 and safety of ipragliflozin in patients with type 2 diabetes inadequately controlled on  
45 metformin: a dose-finding study. *Diabetes Obes Metab*. 2013;15(5):403–409.
- 46  
47 107. Wilding JPH, Norwood P, T'joen C, Bastien A, List JF, Fiedorek FT. A Study of  
48 Dapagliflozin in Patients With Type 2 Diabetes Receiving High Doses of Insulin Plus Insulin  
49 Sensitizers: Applicability of a novel insulin-independent treatment. *Diabetes Care*. 2009 Sep  
50 1;32(9):1656–62.
- 51  
52 108. Wilding JPH, Woo V, Rohwedder K, Sugg J, Parikh S. Dapagliflozin in patients with  
53 type 2 diabetes receiving high doses of insulin: efficacy and safety over 2 years. *Diabetes  
54 Obes Metab*. 2014;16(2):124–136.

109. Yale J-F, Bakris G, Cariou B, Nieto J, David-Neto E, Yue D, et al. Efficacy and safety of canagliflozin over 52 weeks in patients with type 2 diabetes mellitus and chronic kidney disease. *Diabetes Obes Metab*. 2014;16(10):1016–1027.
110. Zhao X, Cui Y, Zhao S, Lang B, Broedl UC, Salsali A, et al. Pharmacokinetic and Pharmacodynamic Properties and Tolerability of Single- and multiple-dose Once-daily Empagliflozin, a Sodium Glucose Cotransporter 2 Inhibitor, in Chinese Patients With Type 2 Diabetes Mellitus. *Clin Ther*. 2015 Jul 1;37(7):1493–502.
111. Dagogo-Jack S, Liu J, Eldor R, Amorin G, Johnson J, Hille D, et al. Efficacy and safety of the addition of ertugliflozin in patients with type 2 diabetes mellitus inadequately controlled with metformin and sitagliptin: The VERTIS SITA2 placebo-controlled randomized study. *Diabetes Obes Metab* [Internet]. 2017 Oct 23 [cited 2017 Dec 15]; Available from: <http://doi.wiley.com/10.1111/dom.13116>
112. Maldonado-Lutomirsky M, S fteland E, Meier J, Vangen B, Toorawa R, Woerle H, et al. Empagliflozin (EMPA) as add-on to linagliptin (LINA) and metformin in patients with type 2 diabetes (T2DM): A 24-week randomised, double-blind, parallel-group trial. *Diabetologia*. 2016;59(1):S93.
113. Merker L, H ring H-U, Christiansen AV, Roux F, Salsali A, Kim G, et al. Empagliflozin as add-on to metformin in people with Type 2 diabetes. *Diabet Med*. 2015 Dec;32(12):1555–67.
114. Neal B, Perkovic V, de Zeeuw D, Mahaffey KW, Fulcher G, Ways K, et al. Efficacy and Safety of Canagliflozin, an Inhibitor of Sodium–Glucose Cotransporter 2, When Used in Conjunction With Insulin Therapy in Patients With Type 2 Diabetes. *Diabetes Care*. 2015 Mar;38(3):403–11.
115. Ridderstr le M, Andersen KR, Zeller C, Kim G, Woerle HJ, Broedl UC, et al. Comparison of empagliflozin and glimepiride as add-on to metformin in patients with type 2 diabetes: a 104-week randomised, active-controlled, double-blind, phase 3 trial. *Lancet Diabetes Endocrinol*. 2014 Sep;2(9):691–700.
116. Sykes AP, Kemp GL, Dobbins R, O’Connor-Semmes R, Almond SR, Wilkison WO, et al. Randomized efficacy and safety trial of once-daily remogliflozin etabonate for the treatment of type 2 diabetes. *Diabetes Obes Metab*. 2015;17(1):98–101.
117. Tanizawa Y, Kaku K, Araki E, Tobe K, Terauchi Y, Utsunomiya K, et al. Long-term safety and efficacy of tofogliflozin, a selective inhibitor of sodium-glucose cotransporter 2, as monotherapy or in combination with other oral antidiabetic agents in Japanese patients with type 2 diabetes mellitus: multicenter, open-label, randomized controlled trials. *Expert Opin Pharmacother*. 2014 Apr;15(6):749–66.
118. Yang W, Han P, Liu B, Mansfield C, Joen T, Iqbal N, et al. Dapagliflozin (DAPA) reduces HbA1c in asian patients with T2DM after metformin (MET) failure. *Diabetes*. 2014;63:A279.
119. Gupta S, Shaikh S, Joshi P, Bhure S, Suvarna V. Long-Term Efficacy and Safety of Empagliflozin Monotherapy in Drug-Na ve Patients with Type 2 Diabetes in Indian Subgroup: Results from a 76-week Extension Trial of Phase III, Double-Blind, Randomized Study. *Indian J Endocrinol Metab*. 2017;21(2):286.

- 1  
2 120. Kadowaki T, Inagaki N, Kondo K, Nishimura K, Kaneko G, Maruyama N, et al. Efficacy  
3 and safety of canagliflozin as add-on therapy to teneligliptin in Japanese patients with type 2  
4 diabetes mellitus: Results of a 24-week, randomized, double-blind, placebo-controlled trial:  
5 KADOWAKI et al. *Diabetes Obes Metab*. 2017 Jun;19(6):874–82.  
6  
7 121. Terra SG, Focht K, Davies M, Frias J, Derosa G, Darekar A, et al. Phase III, efficacy  
8 and safety study of ertugliflozin monotherapy in people with type 2 diabetes mellitus  
9 inadequately controlled with diet and exercise alone: TERRA ET AL . *Diabetes Obes Metab*.  
10 2017 May;19(5):721–8.  
11  
12 122. Terauchi Y, Tamura M, Senda M, Gunji R, Kaku K. Efficacy and safety of tofogliflozin  
13 in Japanese patients with type 2 diabetes mellitus with inadequate glycaemic control on  
14 insulin therapy (J-STEP/INS): Results of a 16-week randomized, double-blind, placebo-  
15 controlled multicentre trial. *Diabetes Obes Metab*. 2017 Oct;19(10):1397–407.  
16  
17 123. Zinman B, Wanner C, Lachin JM, Fitchett D, Bluhmki E, Hantel S, et al. Empagliflozin,  
18 Cardiovascular Outcomes, and Mortality in Type 2 Diabetes. *N Engl J Med*. 2015 Sep 17;  
19  
20 124. Szalat A, Perlman A, Muszkat M, Khamaisi M, Abassi Z, Heyman SN. Can SGLT2  
21 Inhibitors Cause Acute Renal Failure? Plausible Role for Altered Glomerular Hemodynamics  
22 and Medullary Hypoxia. *Drug Saf*. 2017 Sep 26;1–14.  
23  
24 125. Nadkarni GN, Ferrandino R, Chang A, Surapaneni A, Chauhan K, Poojary P, et al.  
25 Acute Kidney Injury in Patients on SGLT2 Inhibitors: A Propensity-Matched Analysis.  
26 *Diabetes Care*. 2017 Nov;40(11):1479–85.  
27  
28 126. Jensen ML, Persson F, Andersen GS, Ridderstråle M, Nolan JJ, Carstensen B, et al.  
29 Incidence of Ketoacidosis in the Danish Type 2 Diabetes Population Before and After  
30 Introduction of Sodium-Glucose Cotransporter 2 Inhibitors-A Nationwide, Retrospective  
31 Cohort Study, 1995-2014. *Diabetes Care*. 2017 May;40(5):e57–8.  
32  
33 127. Fralick M, Schneeweiss S, Patorno E. Risk of Diabetic Ketoacidosis after Initiation of  
34 an SGLT2 Inhibitor. *N Engl J Med*. 2017 08;376(23):2300–2.  
35  
36 128. Fadini GP, Bonora BM, Avogaro A. SGLT2 inhibitors and diabetic ketoacidosis: data  
37 from the FDA Adverse Event Reporting System. *Diabetologia*. 2017 Aug 1;60(8):1385–9.  
38  
39 129. Loke YK, Price D, Herxheimer A, Cochrane Adverse Effects Methods Group.  
40 Systematic reviews of adverse effects: framework for a structured approach. *BMC Med Res*  
41 *Methodol*. 2007 Jul 5;7:32.  
42  
43  
44  
45  
46  
47  
48  
49  
50  
51  
52  
53  
54  
55  
56  
57  
58  
59  
60

## Tables

Table 1. Sub-group Analysis

| Group                              | Relative Risk<br>(95% CI, I <sup>2</sup> ) | # of<br>Studies | Total # of<br>outcomes/patients |
|------------------------------------|--------------------------------------------|-----------------|---------------------------------|
| <b>Prior use of anti-diabetics</b> |                                            |                 |                                 |
| AKI                                |                                            |                 |                                 |
| Prior/Concurrent Diabetes Therapy  | 0.51 (0.14-1.84; 0.72%)                    | 6               | 90/10,651                       |
| Treatment Naïve                    | 0.60 (0.39-0.92; 0.00%)                    | 2               |                                 |
| DKA                                |                                            |                 |                                 |
| Prior/Concurrent Diabetes Therapy  | 0.65 (0.23-1.81; 0.00%)                    | 12              | 13/13,460                       |
| Treatment Naïve                    | 0.66 (0.16-2.71; 0.00%)                    | 4               |                                 |
| UTI                                |                                            |                 |                                 |
| Prior/Concurrent Diabetes Therapy  | 1.05 (0.95-1.17; 5.36%)                    | 60              | 3318/37,638                     |
| Treatment Naïve                    | 1.00 (0.91-1.10; 0.00%)                    | 23              |                                 |
| Fracture                           |                                            |                 |                                 |
| Prior/Concurrent Diabetes Therapy  | 0.80 (0.55-1.15; 4.04%)                    | 35              | 435/27,953                      |
| Treatment Naïve                    | 0.79 (0.46-1.36; 6.30%)                    | 11              |                                 |
| <b>Risk of Bias</b>                |                                            |                 |                                 |
| AKI                                |                                            |                 |                                 |
| Low Risk of Bias                   | 0.58 (0.38-0.89; 0.0%)                     | 4               | 90/10,651                       |
| High Risk of Bias                  | 0.71 (0.12-4.37; 25.5%)                    | 4               |                                 |
| DKA                                |                                            |                 |                                 |
| Low Risk of Bias                   | 0.89 (0.26-3.01; 0.0%)                     | 8               | 13/13,460                       |
| High Risk of Bias                  | 0.49 (0.003-71.59; 94.8%)                  | 8               |                                 |
| UTI                                |                                            |                 |                                 |
| Low Risk of Bias                   | 0.99 (0.91-1.08; 0.0%)                     | 47              | 3318/37,638                     |
| High Risk of Bias                  | 1.08 (0.11-10.64; 99.7%)                   | 36              |                                 |
| Fracture                           |                                            |                 |                                 |
| Low Risk of Bias                   | 0.95 (0.77-1.18; 0.0%)                     | 21              | 435/27,953                      |
| High Risk of Bias                  | 0.56 (0.03-9.50; 97.0%)                    | 25              |                                 |
| <b>Definition of UT</b>            |                                            |                 |                                 |
| UTI                                |                                            |                 |                                 |
| Predefined list of terms           | 0.99 (0.91-1.07; 0.0%)                     | 19              | 3318/37,638                     |
| Suggestive of UTI                  | 1.13 (0.87-1.47; 0.0%)                     | 11              |                                 |
| Positive culture                   | 0.91 (0.51-1.62; 24.27%)                   | 2               |                                 |
| As per investigator                | 0.82 (0.41-1.61; 0.0%)                     | 2               |                                 |
| Not defined                        | 1.12 (0.94-1.34; 1.61%)                    | 49              |                                 |



## List of Figures

All figures supplied as separate documents.

*Figure 1. Flow Diagram for Included Studies*

*Figure 2. Risk of acute kidney injury with SGLT2 inhibitors compared to placebo*

*Figure 3. Risk of diabetic ketoacidosis from SGLT2 inhibitors compared to placebo*

*Figure 4. Risk of urinary tract infections with SGLT2 inhibitor compared to placebo*

*Figure 5. Risk of urinary tract infection with SGLT2 inhibitors compared to other active treatments*

*Figure 6. Risk of fracture with SGLT2 inhibitors compared to placebo*

For peer review only

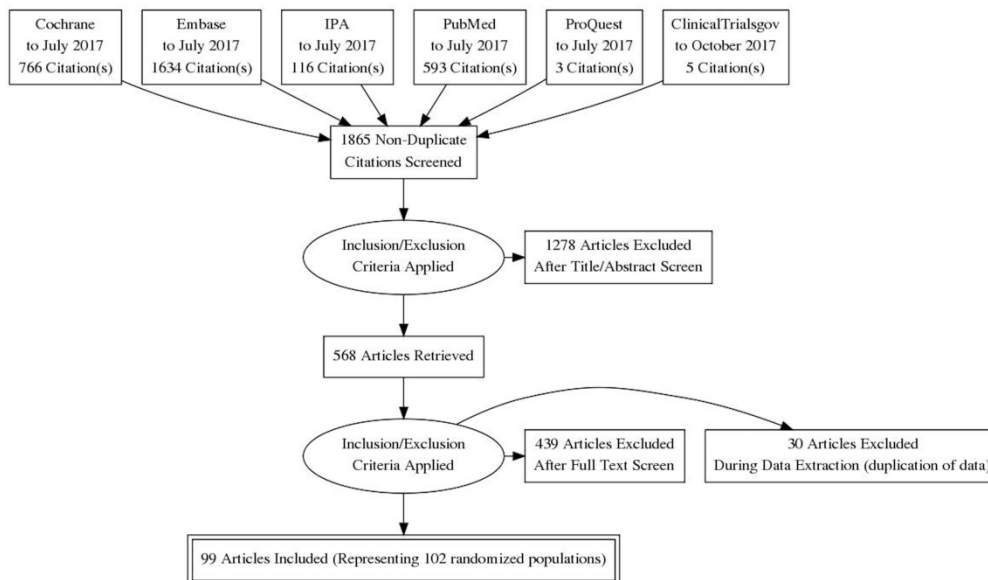

Figure 1. Flow Diagram of Included Studies

411x240mm (300 x 300 DPI)

1  
2  
3  
4  
5  
6  
7  
8  
9  
10  
11  
12  
13  
14  
15  
16  
17  
18  
19  
20  
21  
22  
23  
24  
25  
26  
27  
28  
29  
30  
31  
32  
33  
34  
35  
36  
37  
38  
39  
40  
41  
42  
43  
44  
45  
46  
47  
48  
49  
50  
51  
52  
53  
54  
55  
56  
57  
58  
59  
60

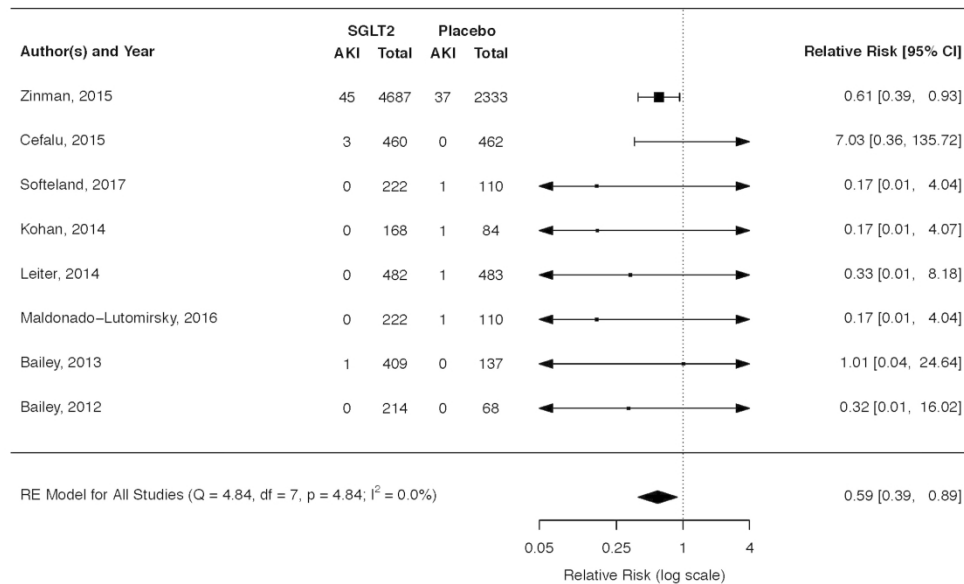

Figure 2. Risk of acute kidney injury with SGLT2 inhibitors compared to placebo

279x215mm (300 x 300 DPI)

1  
2  
3  
4  
5  
6  
7  
8  
9  
10  
11  
12  
13  
14  
15  
16  
17  
18  
19  
20  
21  
22  
23  
24  
25  
26  
27  
28  
29  
30  
31  
32  
33  
34  
35  
36  
37  
38  
39  
40  
41  
42  
43  
44  
45  
46  
47  
48  
49  
50  
51  
52  
53  
54  
55  
56  
57  
58  
59  
60

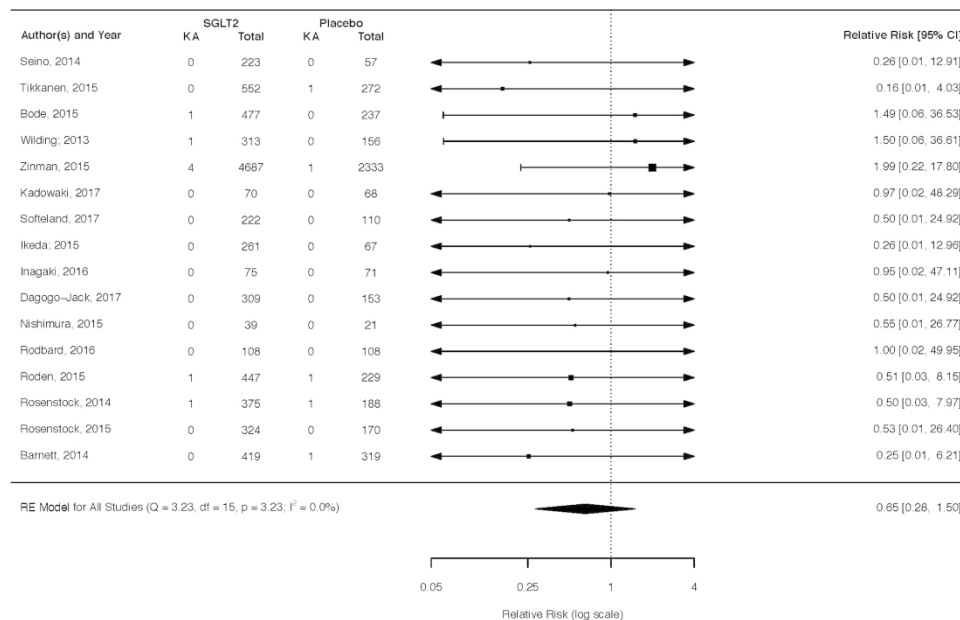

Figure 3. Risk of diabetic ketoacidosis from SGLT2 inhibitors compared to placebo  
279x215mm (300 x 300 DPI)

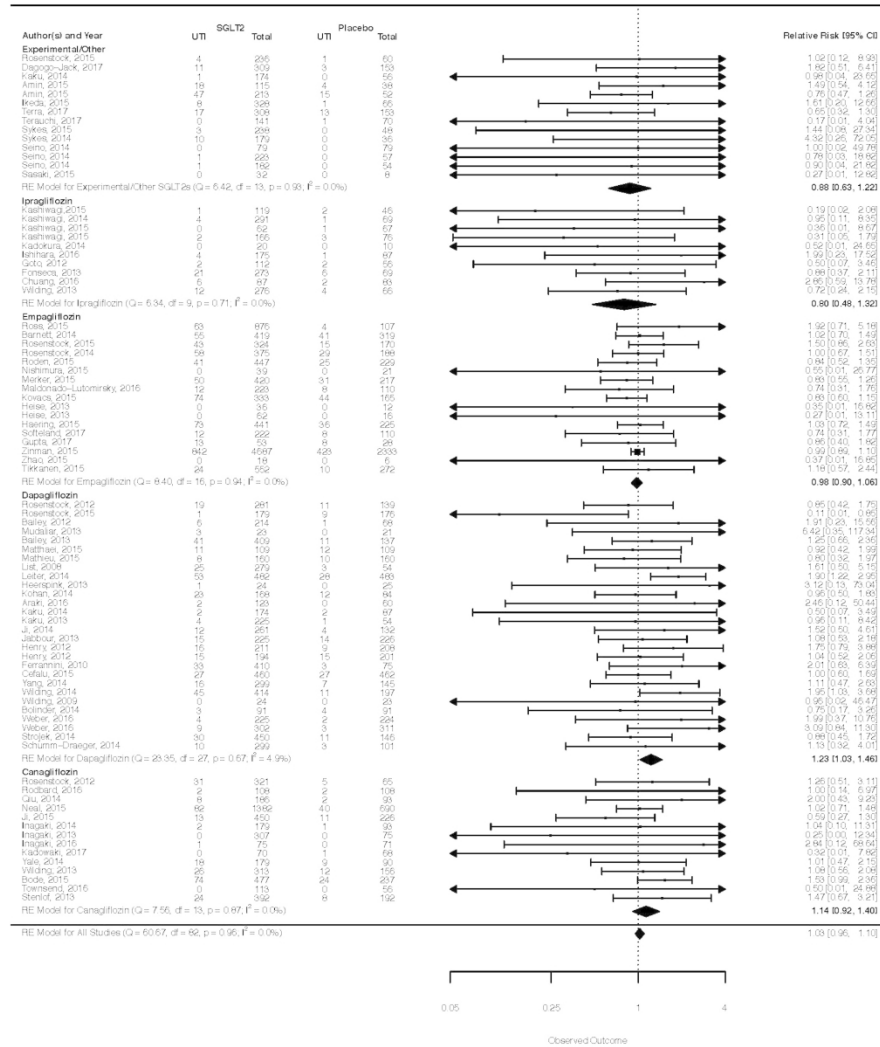

Figure 4. Risk of urinary tract infection with SGLT2 inhibitors compared to placebo

215x279mm (300 x 300 DPI)

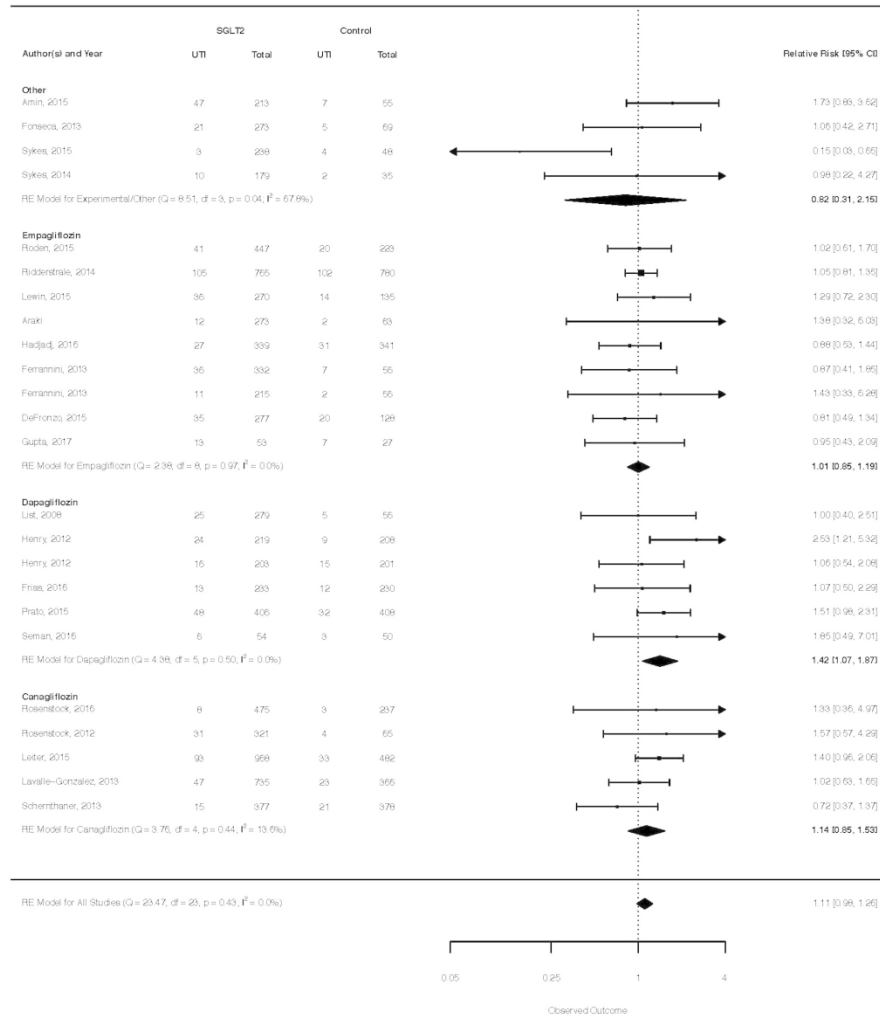

Figure 5. Risk of urinary tract infection with SGLT2 inhibitors compared to active comparators

215x279mm (300 x 300 DPI)



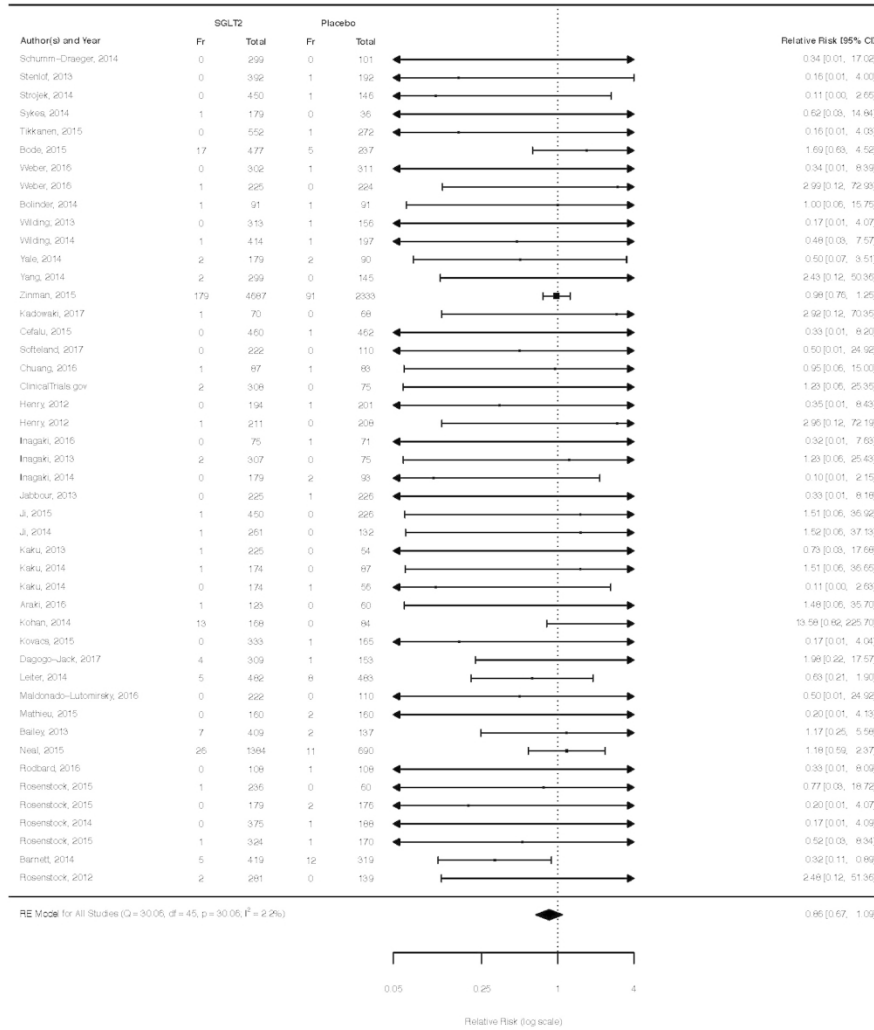

Figure 6. Risk of fracture with SGLT2 inhibitors compared to placebo

215x279mm (300 x 300 DPI)

# Comparative safety of the sodium glucose co-transporter 2 (SGLT2) inhibitors: A systematic review and meta-analysis.

## Online Appendix

### Section 1: Search Strategies

Table 1A. Pubmed Search Strategy

|   |                                                                                                   | Search String                                                                                                                                                                                                                                                                                                                                                                                                                                                                                                                                                                                                                                                                                                                                                                                                                                                                                                                                                                                                                                                                                                                                                                                                                                                                                                                                                                                                                                                                                                                                                                                                                                                                                                    | Results |
|---|---------------------------------------------------------------------------------------------------|------------------------------------------------------------------------------------------------------------------------------------------------------------------------------------------------------------------------------------------------------------------------------------------------------------------------------------------------------------------------------------------------------------------------------------------------------------------------------------------------------------------------------------------------------------------------------------------------------------------------------------------------------------------------------------------------------------------------------------------------------------------------------------------------------------------------------------------------------------------------------------------------------------------------------------------------------------------------------------------------------------------------------------------------------------------------------------------------------------------------------------------------------------------------------------------------------------------------------------------------------------------------------------------------------------------------------------------------------------------------------------------------------------------------------------------------------------------------------------------------------------------------------------------------------------------------------------------------------------------------------------------------------------------------------------------------------------------|---------|
| 1 | Population                                                                                        | "Diabetes Mellitus, Type 2"[Mesh] OR NIDDM[tw] OR t2dm[tw] OR (("type 2"[tw] OR "type ii"[tw] OR "adult onset"[tw] OR "mature onset"[tw] OR "late onset"[tw] OR "noninsulin-dependent"[tw] OR "non insulin dependent"[tw]) AND diabetes[tw])                                                                                                                                                                                                                                                                                                                                                                                                                                                                                                                                                                                                                                                                                                                                                                                                                                                                                                                                                                                                                                                                                                                                                                                                                                                                                                                                                                                                                                                                     | 156898  |
| 2 | Intervention: SGLT2s                                                                              | "Sodium-Glucose Transport Proteins/antagonists and inhibitors"[Mesh] OR "Sodium-Glucose Transporter 2"[Mesh] OR "sodium-glucose co-transporter 2"[tw] OR SGL2[tw] OR SGLT2[tw] OR gliflozin*[tw] OR "Canagliflozin"[Mesh] OR canagliflozin*[tw] OR invokana[tw] OR sulisent[tw] OR "TA 7284"[tw] OR TA7284[tw] OR "JNJ 28431754"[tw] OR JNJ28431754[tw] OR "2-(3-(4-ethoxybenzyl)-4-chlorophenyl)-6-hydroxymethyltetrahydro-2H-pyran-3,4,5-triol"[Supplementary Concept] OR dapagliflozin*[tw] OR farxiga[tw] OR forxiga[tw] OR "BMS 512148"[tw] OR BMS512148[tw] OR "empagliflozin"[Supplementary Concept] OR empagliflozin*[tw] OR jardiance[tw] OR "BI 10773"[tw] OR BI10773[tw] OR ipragliflozin[Supplementary Concept] OR ipragliflozin*[tw] OR suglat[tw] OR "ASP 1941"[tw] OR ASP1941[tw] OR "1,5-anhydro-1-(5-(4-ethoxybenzyl)-2-methoxy-4-methylphenyl)-1-thioglucitol"[Supplementary Concept] OR luseogliflozin*[tw] OR lusefi[tw] OR "TS 071"[tw] OR TS071[tw] OR "remogliflozin etabonate"[Supplementary Concept] OR remogliflozin*[tw] OR "KGT 1681"[tw] OR KGT1681[tw] OR "(2S,3R,4R,5S,6R)-2-(4-chloro-3-(4-ethoxybenzyl)phenyl)-6-(methylthio)tetrahydro-2H-pyran-3,4,5-triol" [Supplementary Concept] OR sotagliflozin*[tw] OR "LX 4221"[tw] OR LX4221[tw] OR "6-((4-ethylphenyl)methyl)-3',4',5',6'-tetrahydro-6'-(hydroxymethyl)spiro(isobenzofuran-1(3H),2'-(2H)pyran)-3',4',5'-triole"[Supplementary Concept] OR tofogliflozin*[tw] OR apleway[tw] OR deberza[tw] OR "CSG 452"[tw] OR CSG452[tw] OR "5-(4-chloro-3-(4-ethoxybenzyl)phenyl)-1-hydroxymethyl-6,8-dioxabicyclo(3.2.1)octane-2,3,4-triole" [Supplementary Concept] OR ertugliflozin*[tw] OR "PF 04971729"[tw] OR PF04971729[tw] | 2323    |
| 3 | #1 AND #2                                                                                         |                                                                                                                                                                                                                                                                                                                                                                                                                                                                                                                                                                                                                                                                                                                                                                                                                                                                                                                                                                                                                                                                                                                                                                                                                                                                                                                                                                                                                                                                                                                                                                                                                                                                                                                  | 1649    |
| 4 | Study Type Filter: Cochrane Highly Sensitive Search Strategy for identifying randomized trials in | ("randomized controlled trial"[pt] OR "controlled clinical trial"[pt] OR randomized[tiab] OR placebo[tiab] OR "clinical trials as topic"[Mesh:NoExp] OR randomly[tiab] OR trial[tij] NOT (animals[mh] NOT humans[mh]))                                                                                                                                                                                                                                                                                                                                                                                                                                                                                                                                                                                                                                                                                                                                                                                                                                                                                                                                                                                                                                                                                                                                                                                                                                                                                                                                                                                                                                                                                           | 1017106 |

|   |                                                                                                                                                                                                                                                                                                                 |  |     |
|---|-----------------------------------------------------------------------------------------------------------------------------------------------------------------------------------------------------------------------------------------------------------------------------------------------------------------|--|-----|
|   | MEDLINE:<br>sensitivity-<br>and<br>precision-<br>maximizing<br>version<br>(2008<br>revision).<br>Available<br>at<br><a href="http://handbook.cochrane.org/chapter_6/box_6_4_b_cochrane_hss_2008_sensprec_pubmed.htm">http://handbook.cochrane.org/chapter_6/box_6_4_b_cochrane_hss_2008_sensprec_pubmed.htm</a> |  |     |
| 5 | #3 AND #4                                                                                                                                                                                                                                                                                                       |  | 593 |

Table 2A: Cochrane Library Search Strategy

|    |                                                                                                                                                                                                                                                                                                                                                                                                                                                                                                                                                                                                                                                                                                                         |        |
|----|-------------------------------------------------------------------------------------------------------------------------------------------------------------------------------------------------------------------------------------------------------------------------------------------------------------------------------------------------------------------------------------------------------------------------------------------------------------------------------------------------------------------------------------------------------------------------------------------------------------------------------------------------------------------------------------------------------------------------|--------|
| #1 | ([mh "Diabetes Mellitus, Type 2"] or NIDDM or t2dm or ("type 2" or "type ii" or "adult onset" or "mature onset" or "late onset" or "noninsulin-dependent" or "non insulin dependent") and (diabetes))                                                                                                                                                                                                                                                                                                                                                                                                                                                                                                                   | 23,213 |
| #2 | ([mh "Sodium-Glucose Transport Proteins"/ai] or [mh "Sodium-Glucose Transporter 2"] or "sodium-glucose co-transporter 2" or SGL2 or SGLT2 or gliflozin* or [mh canagliflozin] or canagliflozin* or invokana or sulisent or "TA 7284" or TA7284 or "JNJ 28431754" or JNJ28431754 or dapagliflozin* or farxiga or forxiga or "BMS 512148" or BMS512148 or empagliflozin* or jardiance or "BI 10773" or BI10773 or ipragliflozin or suglat or "ASP 1941" or ASP1941 or luseogliflozin* or lusefi or "TS 071" or TS071 or remogliflozin* or "KGT 1681" or KGT1681 or sotagliflozin* or "LX 4221" or LX4221 or tofogliflozin* or apleway or deberza or "CSG 452" or CSG452 or ertugliflozin* or "PF 04971729" or PF04971729) | 852    |
| #3 | #1 AND #2                                                                                                                                                                                                                                                                                                                                                                                                                                                                                                                                                                                                                                                                                                               | 766    |

Table 3A: Embase Search Strategy

| No.                            | Query                                                              | Results   |
|--------------------------------|--------------------------------------------------------------------|-----------|
| #5                             | #3 AND #4                                                          | 1,634     |
| #4 - EMBASE<br>RCT filter from | random*:ab,ti OR placebo*:de,ab,ti OR (double NEXT/1 blind*):ab,ti | 1,440,006 |

|                                                                 |                                                                                                                                                                                                                                                                                                                                                                                                                                                                                                                                                                                                                                                                                                                                                                                                                                                                                                                                                                 |         |
|-----------------------------------------------------------------|-----------------------------------------------------------------------------------------------------------------------------------------------------------------------------------------------------------------------------------------------------------------------------------------------------------------------------------------------------------------------------------------------------------------------------------------------------------------------------------------------------------------------------------------------------------------------------------------------------------------------------------------------------------------------------------------------------------------------------------------------------------------------------------------------------------------------------------------------------------------------------------------------------------------------------------------------------------------|---------|
| Wong 2006,<br>best balance of<br>sensitivity and<br>specificity |                                                                                                                                                                                                                                                                                                                                                                                                                                                                                                                                                                                                                                                                                                                                                                                                                                                                                                                                                                 |         |
| #3                                                              | #1 AND #2                                                                                                                                                                                                                                                                                                                                                                                                                                                                                                                                                                                                                                                                                                                                                                                                                                                                                                                                                       | 3,811   |
| #2                                                              | 'sodium glucose cotransporter 2'/de OR 'sodium glucose cotransporter 2 inhibitor'/exp OR 'sodium-glucose co-transporter 2':ab,ti OR sgl2:ab,ti OR sglt2:ab,ti OR gliflozin*:ab,ti OR canagliflozin*:ab,ti OR invokana:ab,ti OR sulisent:ab,ti OR 'ta 7284':ab,ti OR ta7284:ab,ti OR 'jnj 28431754':ab,ti OR jnj28431754:ab,ti OR dapagliflozin*:ab,ti OR farxiga:ab,ti OR forxiga:ab,ti OR 'bms 512148':ab,ti OR bms512148:ab,ti OR empagliflozin*:ab,ti OR jardiance:ab,ti OR 'bi 10773':ab,ti OR bi10773:ab,ti OR ipragliflozin*:ab,ti OR suglat:ab,ti OR 'asp 1941':ab,ti OR asp1941:ab,ti OR luseogliflozin*:ab,ti OR lusefi:ab,ti OR 'ts 071':ab,ti OR ts071:ab,ti OR remogliflozin*:ab,ti OR 'kgt 1681':ab,ti OR kgt1681:ab,ti OR sotagliflozin*:ab,ti OR 'LX 4221':ab,ti OR LX4221:ab,ti OR tofogliflozin*:ab,ti OR apleway:ab,ti OR deberza:ab,ti OR 'CSG 452':ab,ti OR CSG452:ab,ti OR ertugliflozin*:ab,ti OR 'PF 04971729':ab,ti OR PF04971729:ab,ti | 5,218   |
| #1                                                              | 'non insulin dependent diabetes mellitus'/de OR niddm:ab,ti OR t2dm:ab,ti OR ('type 2':ab,ti OR 'type ii':ab,ti OR 'adult onset':ab,ti OR 'mature onset':ab,ti OR 'late onset':ab,ti OR 'noninsulin dependent':ab,ti OR 'non insulin dependent':ab,ti AND diabetes:ab,ti)                                                                                                                                                                                                                                                                                                                                                                                                                                                                                                                                                                                                                                                                                       | 239,937 |

Table 4A: IPA Search Strategy

|    |                                                                                                                                                                                                                                                                                                                                                                                                                                                                                                                                                 |                               |       |
|----|-------------------------------------------------------------------------------------------------------------------------------------------------------------------------------------------------------------------------------------------------------------------------------------------------------------------------------------------------------------------------------------------------------------------------------------------------------------------------------------------------------------------------------------------------|-------------------------------|-------|
| S1 | TX NIDDM OR t2dm OR ("type 2" OR "type ii" OR "adult onset" OR "mature onset" OR "late onset" OR "noninsulin dependent" OR "non insulin dependent") AND (diabetes)                                                                                                                                                                                                                                                                                                                                                                              | Search modes - Boolean/Phrase | 5,907 |
| S2 | TX "sodium-glucose co-transporter 2" OR sgl2 OR sglt2 OR gliflozin OR canagliflozin OR invokana OR sulisent OR "ta 7284" OR ta7284 OR "jnj 28431754" OR jnj28431754 OR dapagliflozin* OR farxiga OR forxiga OR "bms 512148" OR bms512148 OR empagliflozin* OR jardiance OR "bi 10773" OR bi10773 OR ipragliflozin* OR suglat OR "asp 1941" OR asp1941 OR luseogliflozin* OR lusefi OR "ts 071" OR ts071 OR remogliflozin* OR "kgt 1681" OR kgt1681 OR sotagliflozin* OR "LX 4221" OR LX4221 OR tofogliflozin* OR apleway OR deberza OR "CSG452" | Search modes - Boolean/Phrase | 282   |

|    |                                                                                                                                        |                               |        |
|----|----------------------------------------------------------------------------------------------------------------------------------------|-------------------------------|--------|
|    | OR CSG452 OR ertugliflozin* OR "PF 04971729" OR PF04971729                                                                             |                               |        |
| S3 | S1 AND S2                                                                                                                              | Search modes - Boolean/Phrase | 225    |
| S4 | TI randomized OR AB randomized OR TI randomised OR AB randomised OR TI placebo OR AB placebo OR TI randomly OR AB randomly OR TI trial | Search modes - Boolean/Phrase | 58,055 |
| S5 | S3 AND S4                                                                                                                              | Search modes - Boolean/Phrase | 116    |

*Table 5A: ProQuest Search Strategy*

|                                                                                                                                                                                                                                                                                                                                                                                                                                                                                                                                                                                                                                                                                                                                                                                         |   |
|-----------------------------------------------------------------------------------------------------------------------------------------------------------------------------------------------------------------------------------------------------------------------------------------------------------------------------------------------------------------------------------------------------------------------------------------------------------------------------------------------------------------------------------------------------------------------------------------------------------------------------------------------------------------------------------------------------------------------------------------------------------------------------------------|---|
| all(NIDDM OR t2dm OR ("type 2" OR "type ii" OR "adult onset" OR "mature onset" OR "late onset" OR "noninsulin-dependent" OR "non insulin dependent") AND (diabetes)) AND all("sodium-glucose co-transporter 2" OR SGL2 OR SGLT2 OR gliflozin* OR canagliflozin* OR invokana OR sulisent OR "TA 7284" OR TA7284 OR "JNJ 28431754" OR JNJ28431754 OR dapagliflozin* OR farxiga OR forxiga OR "BMS 512148" OR BMS512148 OR empagliflozin* OR jardiance OR "BI 10773" OR BI10773 OR ipragliflozin OR suglat OR "ASP 1941" OR ASP1941 OR luseogliflozin* OR lusefi OR "TS 071" OR TS071 OR remogliflozin* OR "KGT 1681" OR KGT1681 OR sotagliflozin* OR "LX 4221" OR LX4221 OR tofogliflozin* OR apleway OR deberza OR "CSG 452" OR CSG452 OR ertugliflozin* OR "PF 04971729" OR PF04971729) | 3 |
|-----------------------------------------------------------------------------------------------------------------------------------------------------------------------------------------------------------------------------------------------------------------------------------------------------------------------------------------------------------------------------------------------------------------------------------------------------------------------------------------------------------------------------------------------------------------------------------------------------------------------------------------------------------------------------------------------------------------------------------------------------------------------------------------|---|

## Section 2: List of Extracted Variables

Table 6A. List of Extracted Variables

| Variable Extraction                       | Notes                                                                |
|-------------------------------------------|----------------------------------------------------------------------|
| NCT Number, Author and Year               |                                                                      |
| Country in which the study was conducted  | International if applicable                                          |
| Start and End years                       |                                                                      |
| Observation Period (# of weeks)           |                                                                      |
| Total number of participants randomized   |                                                                      |
| Number of Males                           |                                                                      |
| Number of Females                         |                                                                      |
| Background diabetes therapy               |                                                                      |
| Intervention 1: SGLT2 Agent               | This was captured for as many interventions that were used.          |
| Intervention 1: Dose                      |                                                                      |
| Intervention 1: Number of Persons         |                                                                      |
| Intervention 1: Mean Age                  |                                                                      |
| Intervention 1: Age SD                    |                                                                      |
| Intervention 1: Mean baseline HbA1C       |                                                                      |
| Intervention 1: A1C SD                    |                                                                      |
| Comparison 1: SGLT2 Agent                 |                                                                      |
| Comparison 1: Dose                        |                                                                      |
| Comparison 1: Number of Persons           |                                                                      |
| Comparison 1: Mean Age                    |                                                                      |
| Comparison 1: Age SD                      |                                                                      |
| Comparison 1: Mean baseline HbA1C         |                                                                      |
| Comparison 1: A1C SD                      |                                                                      |
| Acute Kidney Injury Reported (yes/no)     |                                                                      |
| Urinary Tract Infection Reported (yes/no) |                                                                      |
| Definition of UTI                         |                                                                      |
| Ketoacidosis Reported (yes/no)            |                                                                      |
| Bone Fracture Reported (yes/no)           |                                                                      |
| Amputation Reported (yes/no)              |                                                                      |
| AKI: Outcomes in Intervention 1(n/N)      | This was captured for each individual intervention and control group |
| AKI: Outcomes in Comparison 1 (n/N)       |                                                                      |
| UTI: Outcomes in Intervention 1(n/N)      |                                                                      |
| UTI: Outcomes in Comparison 1 (n/N)       |                                                                      |
| DKA: Outcomes in Intervention 1(n/N)      |                                                                      |
| DKA: Outcomes in Comparison 1 (n/N)       |                                                                      |
| BF: Outcomes in Intervention 1(n/N)       |                                                                      |

1  
2  
3  
4  
5  
6  
7  
8  
9  
10  
11  
12  
13  
14  
15  
16  
17  
18  
19  
20  
21  
22  
23  
24  
25  
26  
27  
28  
29  
30  
31  
32  
33  
34  
35  
36  
37  
38  
39  
40  
41  
42  
43  
44  
45  
46  
47  
48  
49  
50  
51  
52  
53  
54  
55  
56  
57  
58  
59  
60

|                                      |  |
|--------------------------------------|--|
| BF: Outcomes in Comparison 1 (n/N)   |  |
| Amp: Outcomes in Intervention 1(n/N) |  |
| Amp: Outcomes in Comparison 1 (n/N)  |  |
|                                      |  |

For peer review only



### Section 3: Study Characteristics

Table 7A: Included Study Characteristics

| NCT#<br>Author and Year       | Country          | Study<br>Duration<br>(weeks) | Total<br>Randomized | Background<br>Therapies                     | Intervention(s)                         | Comparator(s)                 | Outcomes<br>Reported |
|-------------------------------|------------------|------------------------------|---------------------|---------------------------------------------|-----------------------------------------|-------------------------------|----------------------|
| NCT01059825<br>Amin, 2015     | International    | 12                           | 328                 | Prior therapy<br>stabilized to<br>metformin | Ertugliflozin<br>1mg, 5 mg, 10mg , 25mg | Placebo, Sitagliptin<br>100mg | UTI                  |
| NCT01059825<br>Amin, 2015     | International    | 4                            | 194                 | Uncontrolled on 2<br>agents                 | Ertugliflozin<br>1mg, 5mg, 25mg         | Placebo                       | UTI                  |
| NCT02157298<br>Araki, 2016    | Japan            | 16                           | 182                 | Prior insulin<br>therapy DPP4<br>allowed    | Dapagliflozin<br>5 mg                   | Placebo                       | UTI, BF              |
| NCT01368081<br>Araki          | Japan            | 52                           | 1160                | Prior SU                                    | Empagliflozin<br>10mg, 25mg             | Metformin 50-<br>2250mg/day   | UTI, BF              |
| NCT00528879<br>Bailey, 2013   | International    | 102                          | 546                 | Prior metformin                             | Dapagliflozin<br>2.5mg, 5mg, 10mg       | Placebo                       | UTI, AKI, BF         |
| None<br>Bailey, 2012          | International    | 24                           | 282                 | Treatment Naive                             | Dapagliflozin<br>1mg, 2.5mg, 5mg        | Placebo                       | UTI, AKI, BF         |
| NCT01164501<br>Barnett, 2014  | International    | 52                           | 741                 | Any prior<br>therapies                      | Empagliflozin<br>10mg, 25mg             | Placebo                       | UTI, DKA, BF         |
| NCT01106651<br>Bode, 2015     | International    | 104                          | 716                 | Prior Naive mono<br>or combo therapy        | Canagliflozin<br>100mg, 300mg           | Placebo                       | UTI, DKA, BF         |
| NCT00855166<br>Bolinder, 2014 | European         | 102                          | 182                 | Prior metformin                             | Dapagliflozin<br>10mg                   | Placebo                       | UTI, BF              |
| NCT01031680<br>Cefalu, 2015   | International    | 52                           | 922                 | Any prior<br>therapies                      | Dapagliflozin<br>10mg                   | Placebo                       | UTI, AKI, BF         |
| NCT01505426<br>Chuang, 2016   | Korea and Taiwan | 24                           | 171                 | Prior metformin                             | Ipragliflozin<br>50mg                   | Placebo                       | UTI, BF              |
| NCT01422876<br>DeFronzo, 2015 | International    | 52                           | 686                 | Prior metformin                             | Empagliflozin<br>10mg, 25mg             | Linagliptin 5mg               | UTI                  |
| NCT00660907<br>Prato, 2015    | International    | 208                          | 816                 | Prior metformin                             | Dapagliflozin<br>(mixed dose)           | Glipizide (mixed<br>doses)    | UTI, BF              |

|                                 |                                                 |        |      |                                      |                                                  |                             |               |
|---------------------------------|-------------------------------------------------|--------|------|--------------------------------------|--------------------------------------------------|-----------------------------|---------------|
| NCT00881530<br>Ferrannini, 2013 | International                                   | 78     | 271  | Treatment Naive                      | Empagliflozin<br>10mg, 25mg                      | Metformin 2000mg<br>max     | UTI, BF       |
| NCT00881530<br>Ferrannini, 2013 | International                                   | 78     | 388  | Prior metformin                      | Empagliflozin<br>10mg, 25mg                      | Sitagliptin 100mg           | UTI, BF       |
| NCT00528372<br>Ferrannini, 2010 | International                                   | 24     | 485  | Treatment Naive                      | Dapagliflozin<br>2.5mg, 5mg, 10mg                | Placebo                     | UTI           |
| NCT01071850<br>Fonseca, 2013    | India, Philippines,<br>Columbia, Mexico,<br>USA | 12-    | 412  | Treatment Naive                      | Ipragliflozin<br>12.5mg, 50mg, 150mg,<br>300mg   | Placebo, Metormin<br>1500mg | UTI           |
| NCT02229396<br>Frias, 2016      | International                                   | 28     | 695  | Prior metformin                      | Dapagliflozin<br>10mg                            | Exenatide 2mg               | UTI, AKI, DKA |
| NCT01719003<br>Hadjadj, 2016    | International                                   | 24     | 1364 | Treatment Naive                      | Empagliflozin<br>10mg, 25mg                      | Metformin 1000mg,<br>2000mg | UTI, DKA, BF  |
| NCT01289990<br>Haering, 2015    | International                                   | 76     | 666  | Prior Metformin<br>and SU            | Empagliflozin<br>10mg, 25mg                      | Placebo                     | UTI           |
| None<br>Heise, 2013             | Germany                                         | 4      | 78   | Not described                        | Empagliflozin<br>10mg, 25mg, 100mg               | Placebo                     | UTI           |
| None<br>Heise, 2013             | Germany                                         | 9 days | 48   | Prior Naive mono<br>or combo therapy | Empagliflozin<br>2.5mg, 10mg, 25mg,<br>100mg     | Placebo                     | UTI           |
| NCT00643851<br>Henry, 2012      | International                                   | 24     | 603  | Treatment Naive                      | Dapagliflozin<br>5mg                             | Placebo                     | UTI, BF       |
| NCT00643851<br>Henry, 2012      | International                                   | 24     | 603  | Treatment Naive                      | Dapagliflozin<br>5mg                             | Metformin (mixed<br>doses)  | UTI, BF       |
| NCT00859898<br>Henry, 2012      | International                                   | 24     | 641  | Treatment Naive                      | Dapagliflozin<br>10mg                            | Placebo                     | UTI, BF       |
| NCT00859898<br>Henry, 2012      | International                                   | 24     | 641  | Treatment Naive                      | Dapagliflozin<br>10mg                            | Metformin (mixed<br>doses)  | UTI, BF       |
| NCT00800176<br>Ikeda; 2015      | International                                   | 12     | 398  | Naive or<br>metformin                | Tofogliflozin<br>2.5mg, 5mg, 10mg,<br>20mg, 40mg | Placebo                     | UTI, DKA      |
| NCT02220920<br>Inagaki, 2016    | Japan                                           | 16     | 146  | Prior insulin<br>therapy             | Canagliflozin<br>100mg                           | Placebo                     | UTI, DKA, BF  |
| NCT01387737<br>Inagaki, 2015    | Japan                                           | 52     | 1299 | Any prior<br>therapies<br>washed-out | Canagliflozin<br>100mg, 200mg                    | No comparator               | UTI, DKA, BF  |

|                                |               |    |     |                                                    |                                               |               |         |
|--------------------------------|---------------|----|-----|----------------------------------------------------|-----------------------------------------------|---------------|---------|
| NCT01022112<br>Inagaki, 2013   | Japan         | 12 | 383 | Any prior<br>therapies<br>washed-out               | Canagliflozin<br>50mg, 100mg, 200mg,<br>300mg | Placebo       | UTI, BF |
| NCT01413204<br>Inagaki, 2014   | Japan         | 24 | 272 | Any prior<br>therapies<br>washed-out               | Canagliflozin<br>100mg, 200mg                 | Placebo       | UTI, BF |
| NCT02175784<br>Ishihara, 2016  | Japan         | 16 | 262 | Prior insulin<br>others allowed                    | Ipragliflozin<br>50mg                         | Placebo       | UTI     |
| NCT00984867<br>Jabbour, 2013   | International | 48 | 451 | Prior DPP4 maybe<br>metformin no<br>others         | Dapagliflozin<br>10mg                         | Placebo       | UTI, BF |
| NCT01381900<br>Ji, 2015        | International | 18 | 678 | Prior Metformin<br>and maybe SU                    | Canagliflozin<br>100mg, 300mg                 | Placebo       | UTI, BF |
| NCT01095653<br>Ji, 2014        | Asia          | 24 | 393 | Treatment Naive                                    | Dapagliflozin<br>5mg, 10mg                    | Placebo       | UTI, BF |
| NCT01023945<br>Kadokura, 2014  | Japan         | 2  | 30  | Treatment Naive<br>or monotherapy                  | Ipragliflozin<br>50mg , 100mg                 | Placebo       | UTI     |
| NCT01193218<br>Kadowaki, 2015  | Japan         | 52 | 547 | Treatment Naive<br>or monotherapy                  | Empagliflozin<br>10mg, 25mg                   | No comparator | UTI, BF |
| NCT00972244<br>Kaku, 2013      | Japan         | 12 | 279 | Treatment Naive<br>or 1 or 2 agents at<br>low dose | Dapagliflozin<br>1mg, 2.5mg, 5mg, 10mg        | Placebo       | UTI, BF |
| None<br>Kaku, 2014             | Japan         | 24 | 261 | Treatment Naive<br>or monotherapy                  | Dapagliflozin<br>5mg, 10mg                    | Placebo       | UTI, BF |
| None<br>Kaku, 2014             | Japan         | 24 | 235 | Treatment Naive<br>or washout                      | Tofogliflozin<br>10mg, 20mg, 40mg             | Placebo       | UTI, BF |
| NCT01242215<br>Kashiwagi, 2015 | Japan         | 52 | 245 | Prior SU                                           | Ipragliflozin<br>50mg                         | Placebo       | UTI     |
| NCT01057628<br>Kashiwagi, 2015 | Japan         | 26 | 131 | Treatment Naive<br>or 1 or 2 agents at<br>low dose | Ipragliflozin<br>50mg                         | Placebo       | UTI     |
| NCT00621868<br>Kashiwagi, 2014 | Japan         | 12 | 361 | Treatment Naive<br>or washout                      | Ipragliflozin<br>12.5mg, 25mg, 50mg,<br>100mg | Placebo       | UTI     |
| NCT01316094<br>Kashiwagi, 2015 | Japan         | 52 | 165 | Treatment Naive<br>or 1 or 2 agents at<br>low dose | Ipragliflozin<br>50mg                         | Placebo       | UTI     |

|                                          |               |     |      |                                                   |                                                      |                                  |              |
|------------------------------------------|---------------|-----|------|---------------------------------------------------|------------------------------------------------------|----------------------------------|--------------|
| NCT00663260<br>Kohan, 2014               | International | 104 | 252  | Not described                                     | Dapagliflozin<br>5mg, 10mg                           | Placebo                          | UTI, AKI, BF |
| NCT01210001<br>Kovacs, 2015              | International | 76  | 499  | Prior pioglitazone<br>and maybe<br>metformin      | Empagliflozin<br>10mg, 25mg                          | Placebo                          | UTI, BF      |
| NCT00976495<br>Heerspink, 2013           | International | 12  | 75   | Prior Metformin<br>and maybe SU                   | Dapagliflozin<br>10mg                                | Placebo                          | UTI          |
| NCT01106677<br>Lavalle-Gonzalez,<br>2013 | International | 52  | 1284 | Prior Metformin<br>and maybe SU<br>but washed-out | Canagliflozin<br>100mg, 300mg                        | Sitagliptin 100mg                | UTI, DKA, BF |
| NCT01042977<br>Leiter, 2014              | International | 52  | 964  | Any prior<br>therapies                            | Dapagliflozin<br>10mg                                | Placebo                          | UTI, AKI, BF |
| NCT00968812<br>Leiter, 2015              | International | 104 | 1450 | Prior metformin                                   | Canagliflozin<br>100mg, 300mg                        | Glimepiride 8mg                  | UTI, BF      |
| NCT01422876<br>Lewin, 2015               | International | 52  | 677  | Treatment Naive                                   | Empagliflozin<br>10mg, 25mg                          | Linagliptin 5mg                  | UTI          |
| NCT00263276<br>List, 2008                | International | 12  | 389  | Treatment Naive                                   | Dapagliflozin<br>2.5mg, 5mg, 10mg,<br>20mg, 50mg     | Placebo, Metformin<br>1500mg max | UTI          |
| NCT01646320<br>Mathieu, 2015             | International | 52  | 320  | Prior metformin<br>and DPP4                       | Dapagliflozin<br>10mg                                | Placebo                          | UTI, BF      |
| NCT01392677<br>Matthaei, 2015            | International | 52  | 219  | Prior Metformin<br>and SU                         | Dapagliflozin<br>10mg                                | Placebo                          | UTI          |
| None<br>Mudaliar, 2013                   | International | 12  | 44   | Prior Metformin<br>and maybe SU                   | Dapagliflozin<br>5mg                                 | Placebo                          | UTI          |
| NCT01947855<br>Nishimura, 2015           | Japan         | 4   | 60   | Treatment or<br>monotherapy                       | Empagliflozin<br>10mg, 25mg                          | Placebo                          | UTI, DKA     |
| NCT01340664<br>Qiu, 2014                 | International | 18  | 279  | Prior metformin                                   | Canagliflozin<br>100mg, 300mg                        | Placebo                          | UTI          |
| NCT01989754<br>Rodbard, 2016             | International | 26  | 218  | Prior metformin<br>and DPP4                       | Canagliflozin<br>300mg                               | Placebo                          | UTI, DKA, BF |
| NCT01289990<br>Roden, 2015               | International | 76  | 899  | Treatment Naive                                   | Empagliflozin<br>10mg, 25mg                          | Placebo, Sitagliptin<br>100mg    | UTI, DKA     |
| NCT00642278<br>Rosenstock, 2012          | International | 12  | 451  | Prior metformin                                   | Canagliflozin<br>50mg, 100mg, 200mg,<br>300mg, 600mg | Placebo, Sitagliptin<br>100mg    | UTI          |
| NCT01376557                              | United States | 12  | 299  | Prior metformin                                   | Sotagliflozin                                        | placebo                          | UTI, BF      |

|                                        |               |        |      |                                                     |                                                         |                               |              |
|----------------------------------------|---------------|--------|------|-----------------------------------------------------|---------------------------------------------------------|-------------------------------|--------------|
| Rosenstock, 2015                       |               |        |      |                                                     | 75 mg, 200mg, 400mg                                     |                               |              |
| NCT01809327<br>Rosenstock, 2016        | International | 26     | 1186 | Treatment Naive                                     | Canagliflozin<br>100mg, 300mg                           | Metformin 500mg               | UTI, DKA     |
| NCT01606007<br>Rosenstock, 2015        | International | 24     | 534  | Prior metformin                                     | Dapagliflozin<br>10mg                                   | Placebo                       | UTI, BF      |
| NCT01306214<br>Rosenstock, 2014        | International | 52     | 563  | Prior insulin<br>therapy                            | Empagliflozin<br>10mg, 25mg                             | Placebo                       | UTI, DKA, BF |
| NCT01011868<br>Rosenstock, 2015        | International | 78     | 494  | Prior insulin<br>maybe metformin<br>and SU          | Empagliflozin<br>10mg, 25mg                             | Placebo                       | UTI, DKA     |
| NCT00683878<br>Rosenstock, 2012        | International | 48     | 420  | Treatment Naive<br>or stabilized on<br>pioglitazine | Dapagliflozin<br>5mg, 10mg                              | Placebo                       | UTI, BF      |
| None<br>Ross, 2015                     | International | 16     | 983  | Prior metformin                                     | Empagliflozin<br>10mg, 25mg                             | Placebo                       | UTI          |
| None<br>Sasaki, 2015                   | Japan         | 7 days | 40   | Treatment Naive                                     | Luseogliflozin<br>0.5mg, 1mg, 2.5mg, 5mg                | Placebo                       | UTI          |
| NCT01137812<br>Scherthner, 2013        | International | 52     | 756  | Prior Metformin<br>and SU                           | Canagliflozin<br>300mg                                  | Sitagliptin 100mg             | UTI, BF      |
| NCT01217892<br>Schumm-Draeger,<br>2014 | International | 16     | 400  | Prior metformin                                     | Dapagliflozin<br>5mg, 10mg, 20mg                        | Placebo                       | UTI, BF      |
| None<br>Seino, 2014                    | Japan         | 12     | 239  | Treatment Naive                                     | Luseogliflozin<br>0.5mg, 2.5mg, 5mg                     | Placebo                       | UTI          |
| None<br>Seino, 2014                    | Japan         | 12     | 282  | Treatment Naive                                     | Luseogliflozin<br>1mg, 2.5mg, 5mg, 10mg                 | Placebo                       | UTI, DKA     |
| None<br>Seino, 2014                    | Japan         | 24     | 158  | Treatment Naive                                     | Luseogliflozin<br>2.5mg                                 | Placebo                       | UTI          |
| NCT01081834<br>Stenlof, 2013           | International | 26     | 587  | Treatment Naive<br>or washout                       | Canagliflozin<br>100mg, 300mg                           | Placebo                       | UTI, BF      |
| NCT00680745<br>Strojek, 2014           | International | 48     | 597  | Prior SU                                            | Dapagliflozin<br>2.5mg, 5mg, 10mg                       | Placebo                       | UTI, BF      |
| NCT00500331<br>Sykes, 2015             | international | 12     | 336  | Treatment Naive                                     | Remogliflozin<br>100mg, 200mg, 500mg,<br>1000mg, 2000mg | Placebo, Pioglitazone<br>30mg | UTI          |
| NCT01370005<br>Tikkanen, 2015          | International | 12     | 825  | Treatment Naive                                     | Empagliflozin<br>10mg, 25mg                             | Placebo                       | UTI, DKA, BF |

|                                               |               |        |      |                                 |                                                |                                    |                      |
|-----------------------------------------------|---------------|--------|------|---------------------------------|------------------------------------------------|------------------------------------|----------------------|
| None<br>Townsend, 2016                        | United States | 6      | 171  | Uncontrolled on<br>1-3 agents   | Canagliflozin<br>100mg, 300mg                  | Placebo                            | UTI                  |
| None<br>Seman, 2016                           | Malaysia      | 12     | 110  | Prior Metformin<br>and SU       | Dapagliflozin<br>10mg                          | Sulphonylureas<br>(various agents) | UTI                  |
| NCT01137474<br>Weber, 2016                    | International | 12     | 944  | Any prior<br>therapies          | Dapagliflozin<br>10mg                          | Placebo                            | UTI, BF              |
| NCT01195662<br>Weber, 2016                    | International | 12     | 449  | Any prior<br>therapies          | Dapagliflozin<br>10mg                          | Placebo                            | UTI, BF              |
| NCT01106625<br>Wilding; 2013                  | International | 52     | 469  | Prior Metformin<br>and SU       | Canagliflozin<br>100mg, 300mg                  | Placebo                            | UTI, DKA, BF         |
| NCT01117584<br>Wilding, 2013                  | International | 12     | 343  | Prior metformin                 | Ipragliflozin<br>12.5mg, 50mg, 150mg,<br>300mg | Placebo                            | UTI                  |
| NCT00357370<br>Wilding, 2009                  | International | 12     | 71   | Any prior<br>therapies          | Dapagliflozin<br>10mg, 20mg                    | Placebo                            | UTI                  |
| NCT00673231<br>Wilding, 2014                  | international | 104    | 808  | Prior insulin<br>others allowed | Dapagliflozin<br>2.5mg, 5/10mg, 10mg           | Placebo                            | UTI, BF              |
| NCT01064414<br>Yale, 2014                     | International | 52     | 269  | Treatment Naive<br>or 1 or 2    | Canagliflozin<br>100mg, 300mg                  | Placebo                            | UTI, BF              |
| NCT01316341<br>Zhao, 2015                     | China         | 9 days | 24   | Treatment Naive<br>or 1 or 2    | Empagliflozin<br>10mg, 25mg                    | Placebo                            | UTI                  |
| NCT01131676<br>Zinman, 2015                   | International | 206    | 7028 | Treatment Naive                 | Empagliflozin<br>10mg, 25mg                    | Placebo                            | UTI, AKI, DKA,<br>BF |
| None<br>Goto, 2012                            |               | 24     | 168  | Prior metformin                 | Ipragliflozin<br>50mg                          | Placebo                            | UTI                  |
| NCT02036515<br>Dagogo-Jack, 2017              | International | 26     | 463  | Prior metformin<br>and DPP4     | Ertugliflozin<br>5mg, 15mg                     | Placebo                            | UTI, DKA, BF         |
| NCT01734785<br>Maldonado-<br>Lutomirsky, 2016 | International | 24     | 606  | Prior metformin<br>and DPP4     | Empagliflozin<br>10mg, 25mg                    | Placebo                            | UTI, AKI, BF         |
| NCT01289990<br>Merker, 2015                   | International | 52     | 637  | Prior metformin                 | Empagliflozin<br>10mg, 25mg                    | Placebo                            | UTI                  |
| NCT01032629<br>Neal, 2015                     | International | 52     | 2074 | Prior insulin<br>therapy        | Canagliflozin<br>100mg, 300mg                  | Placebo                            | UTI, BF              |
| NCT01167881<br>Ridderstrale, 2014             | International | 104    | 1549 | Prior metformin                 | Empagliflozin<br>25mg                          | Glimepiride 1-4mg                  | UTI, AKI, BF         |

|                                |               |    |     |                                          |                                                 |                               |                      |
|--------------------------------|---------------|----|-----|------------------------------------------|-------------------------------------------------|-------------------------------|----------------------|
| NCT00495469<br>Sykes, 2014     | UK            | 12 | 252 | Treatment Naive                          | Remogliflozin<br>100mg, 250mg, 500mg,<br>1000mg | Placebo, Pioglitazone<br>30mg | UTI, BF              |
| None<br>Tanizawa, 2014         | Japan         | 52 | 194 | Treatment Naive                          | Tofogliflozin<br>20mg, 40mg                     | No comparator                 | UTI                  |
| None<br>Tanizawa, 2014         | Japan         | 52 | 602 | Any prior<br>therapies                   | Tofogliflozin<br>20mg, 40mg                     | No comparator                 | UTI                  |
| NCT01095666<br>Yang, 2014      |               | 24 | 444 | Prior metformin                          | Dapagliflozin<br>5mg, 10mg                      | Placebo                       | UTI, BF              |
| None<br>Gupta, 2017            |               | 76 | 108 | Treatment Naive                          | Empagliflozin<br>10mg, 25mg                     | Placebo, Sitagliptin<br>100mg | UTI                  |
| NCT02354235<br>Kadowaki, 2017  | Japan         | 24 | 138 | Prior Tenelegliptin                      | Canagliflozin<br>100mg                          | Placebo                       | UTI, DKA, BF         |
| NCT01734785<br>Softeland, 2017 | International | 24 | 333 | Prior metformin                          | Empagliflozin<br>10mg, 25mg                     | Placebo                       | UTI, AKI, DKA,<br>BF |
| NCT01958671<br>Terra, 2017     | International | 26 | 461 | Treatment Naive                          | Ertugliflozin<br>5mg, 15mg                      | Placebo                       | UTI                  |
| NCT 01022112<br>Not Published  |               | 12 | 383 | Treatment Naive                          | Canagliflozin<br>50mg, 100mg, 200mg,<br>300mg   | Placebo                       | BF                   |
| NCT02201004<br>Terauchi, 2017  |               | 16 | 211 | Prior insulin<br>therapy DPP4<br>allowed | Tofogliflozin<br>20mg, 40mg                     | Placebo                       | UTI                  |



**Section 4: Additional Forest Plots**

Figure 1A: Risk of Acute Kidney Injury with SGLT2 Inhibitors compare to Incretins

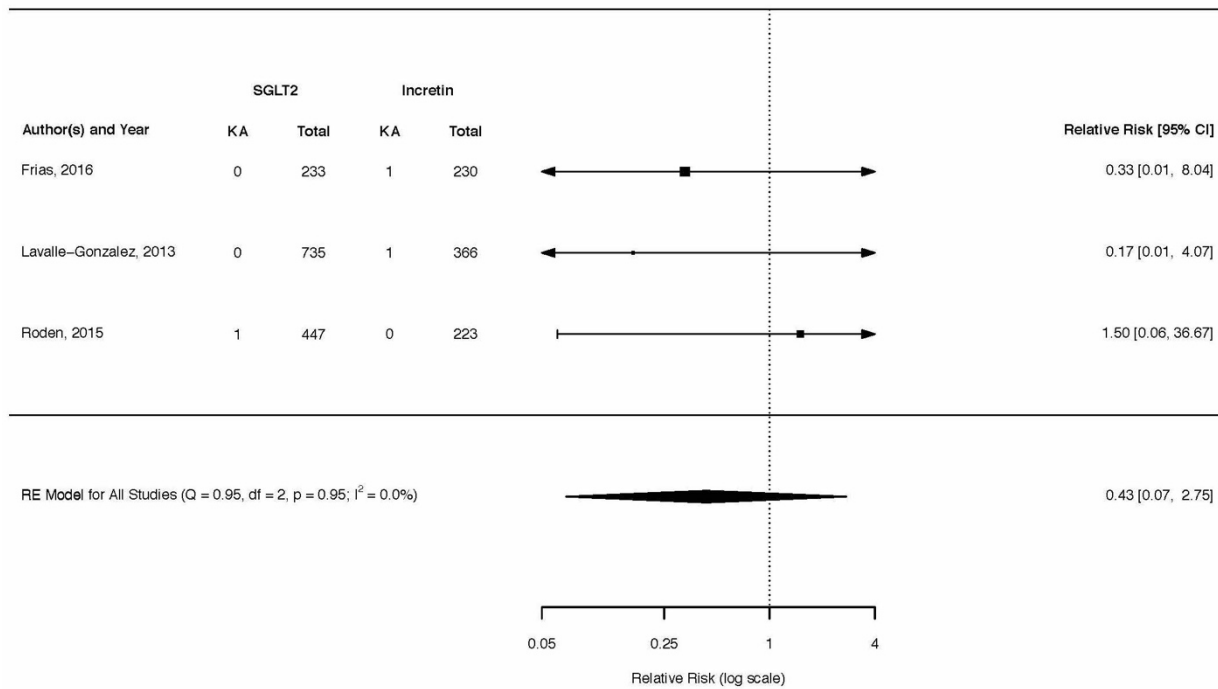

Figure 2A: Risk of Acute Kidney Injury with SGLT2 Inhibitors Compared to Placebo; including studies with at least one outcome.

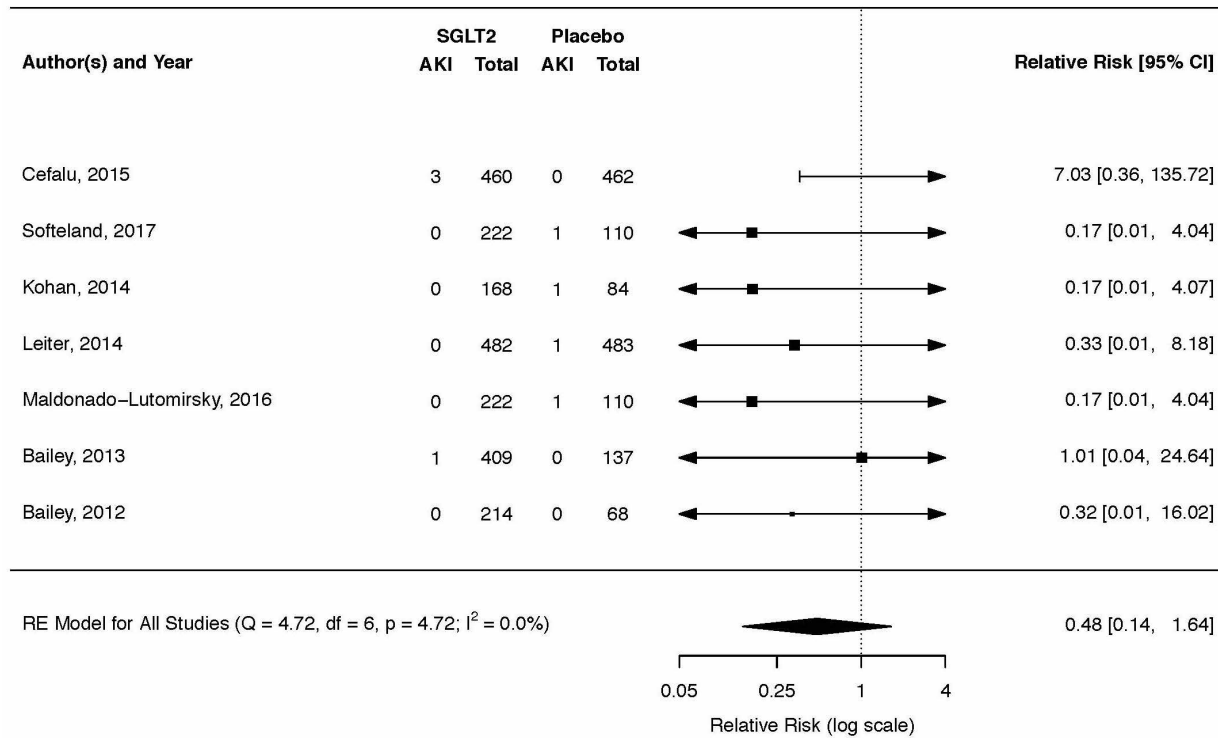

Figure 3A. Risk of Urinary Tract Infections among users of SGLT2 Inhibitors Compared to Active Controls

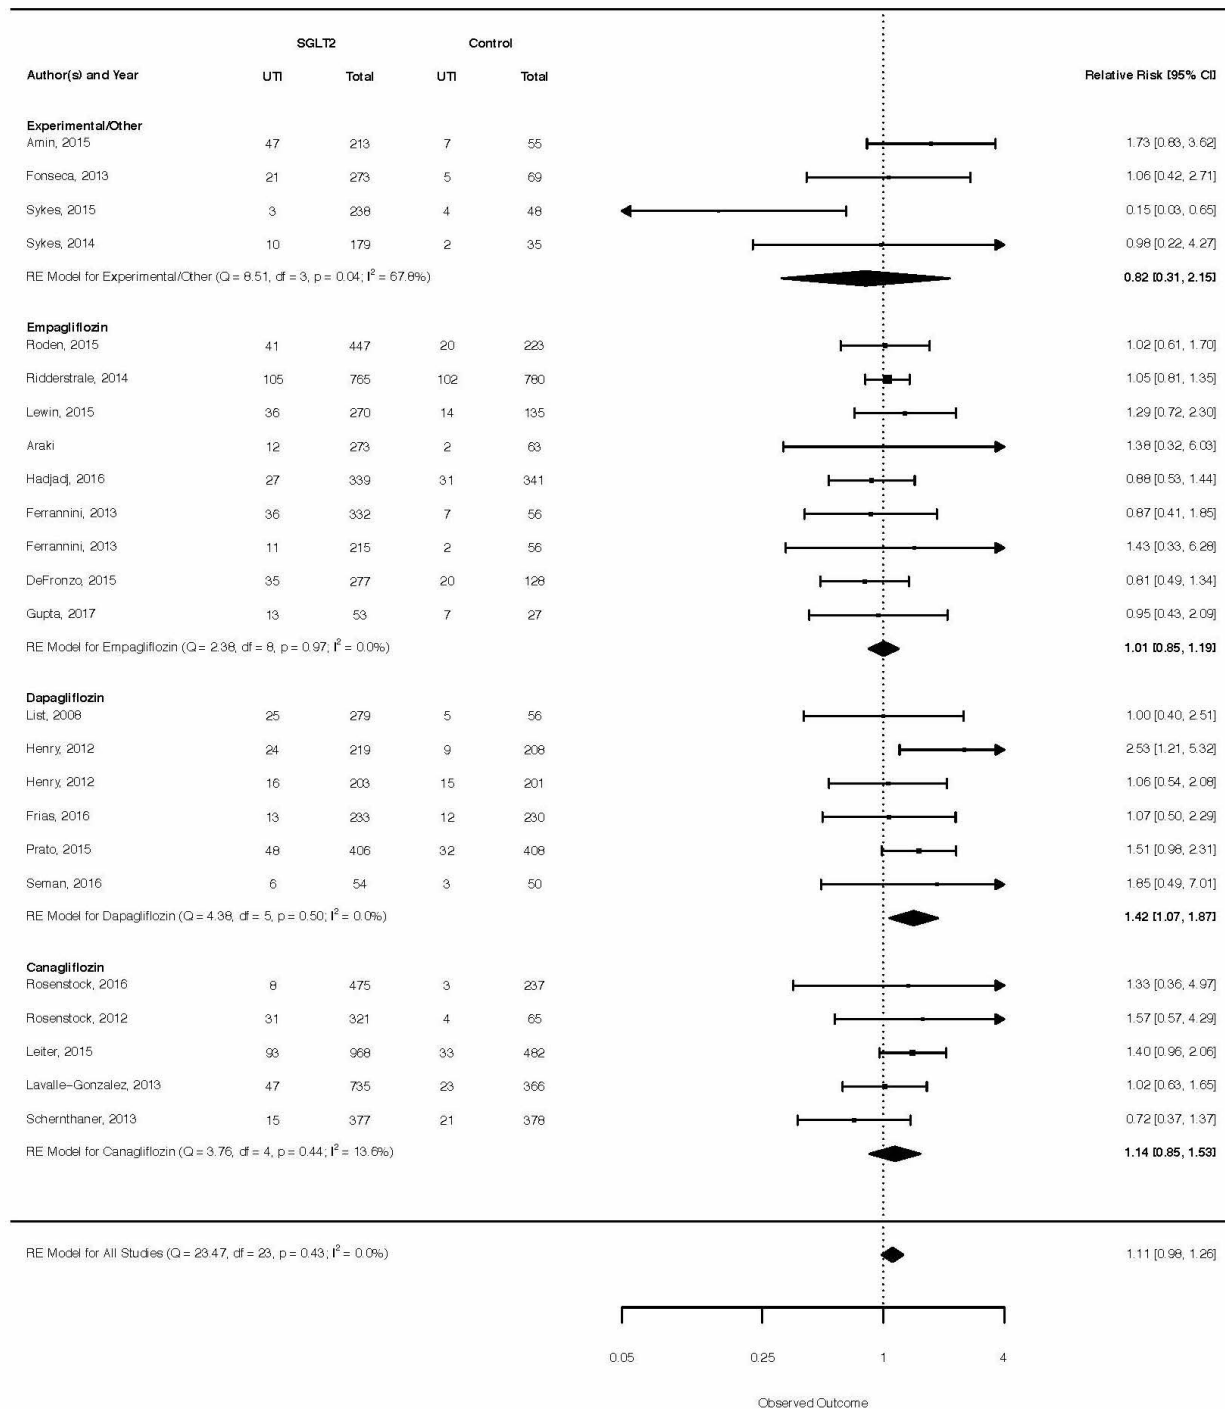

Figure 4A: Risk of Fracture with SGLT2 Inhibitors compared to Metformin

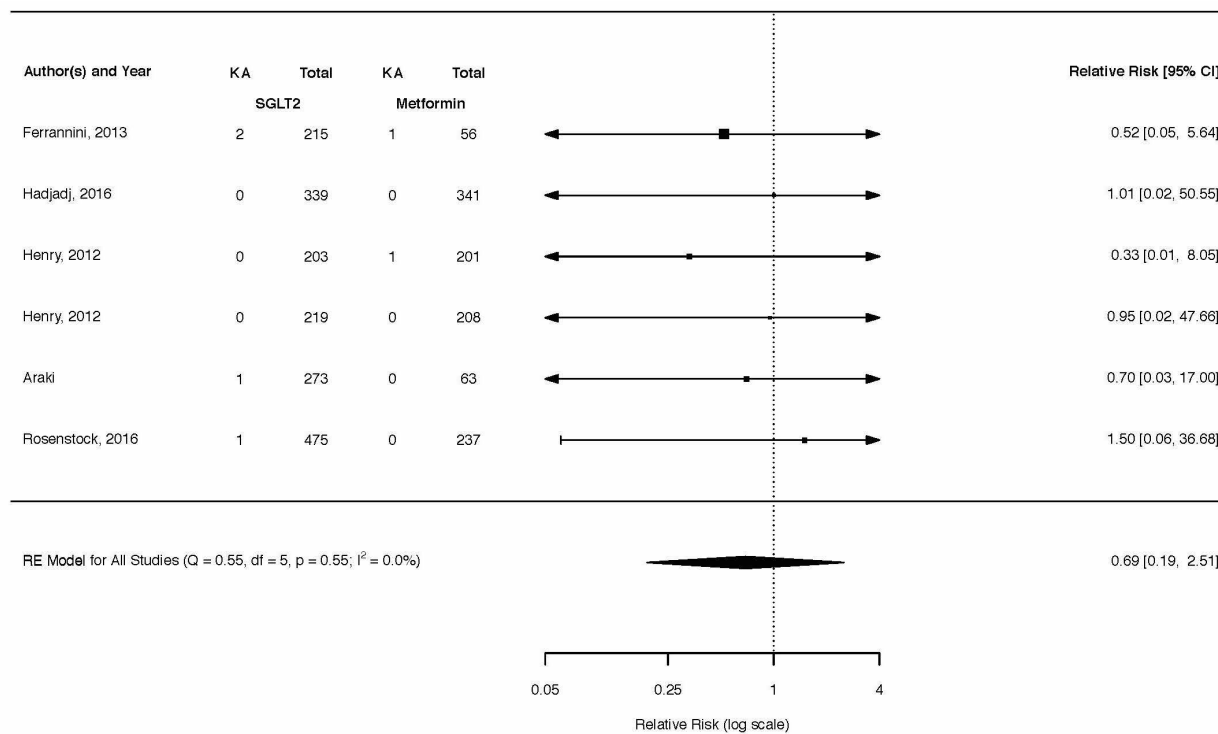

Figure 5A: Risk of Fracture with SGLT2 Inhibitors compared to Sulfonylureas

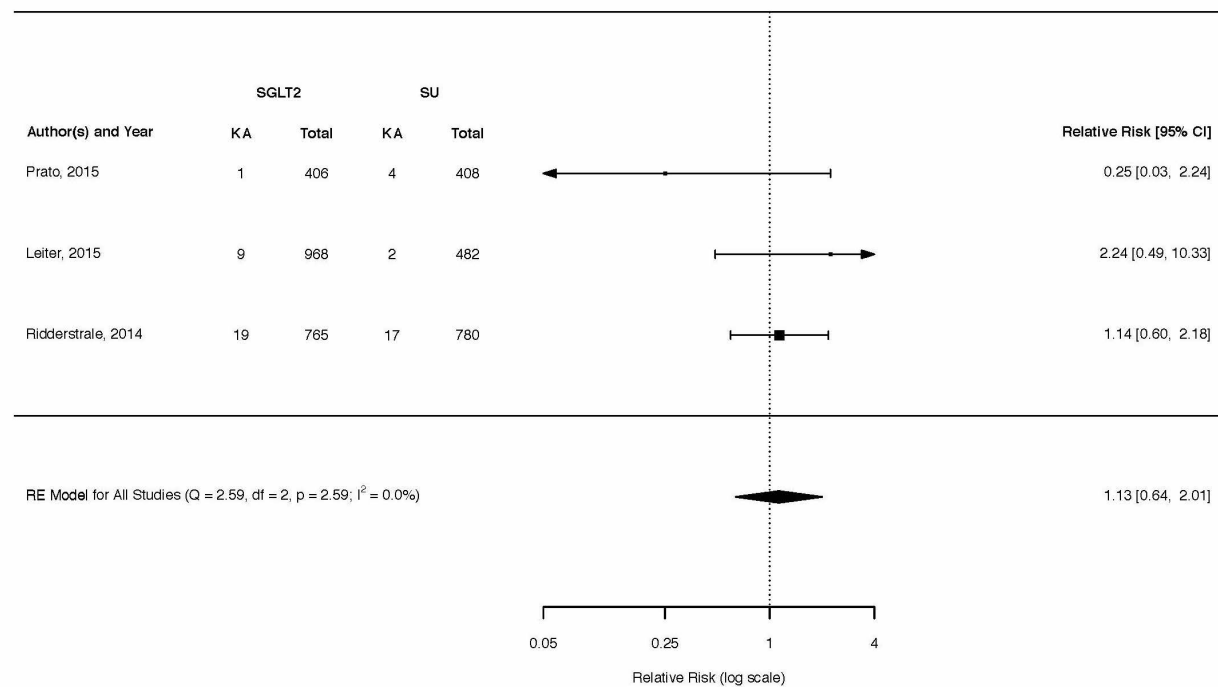

Figure 6A: Risk of Fracture with SGLT2 Inhibitors compared to Incretins

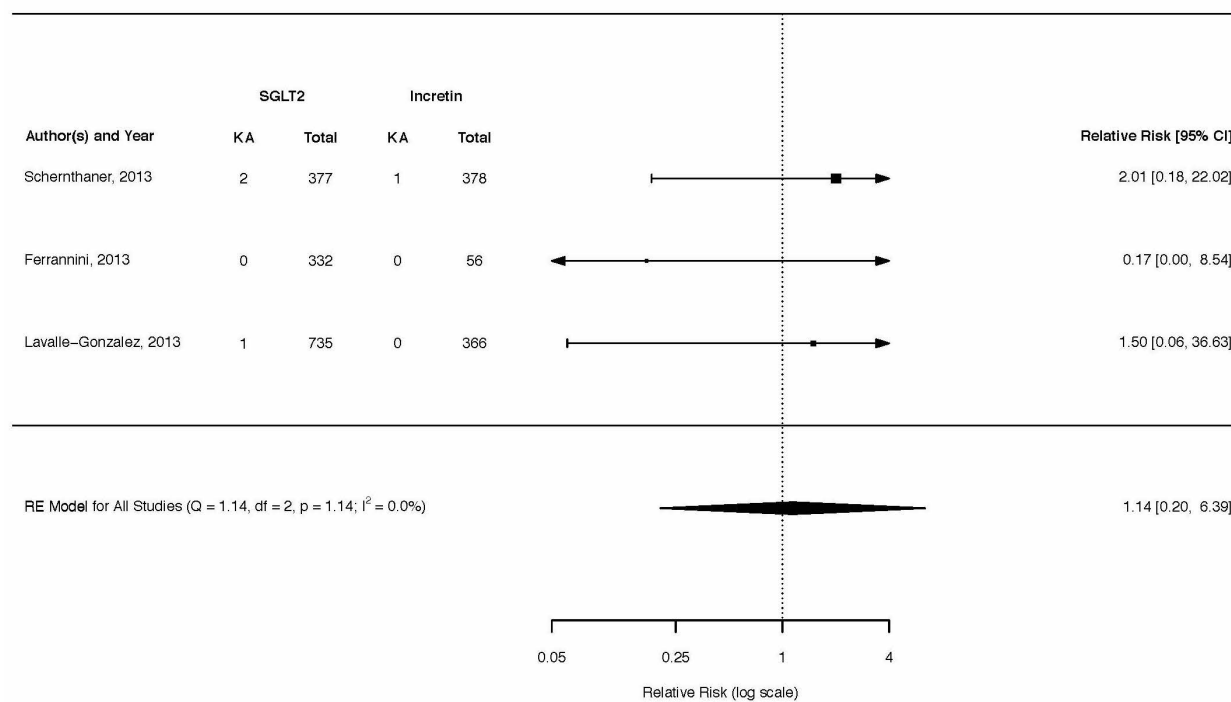

Figure 7A: Risk of Fracture with Canagliflozin compared to Placebo

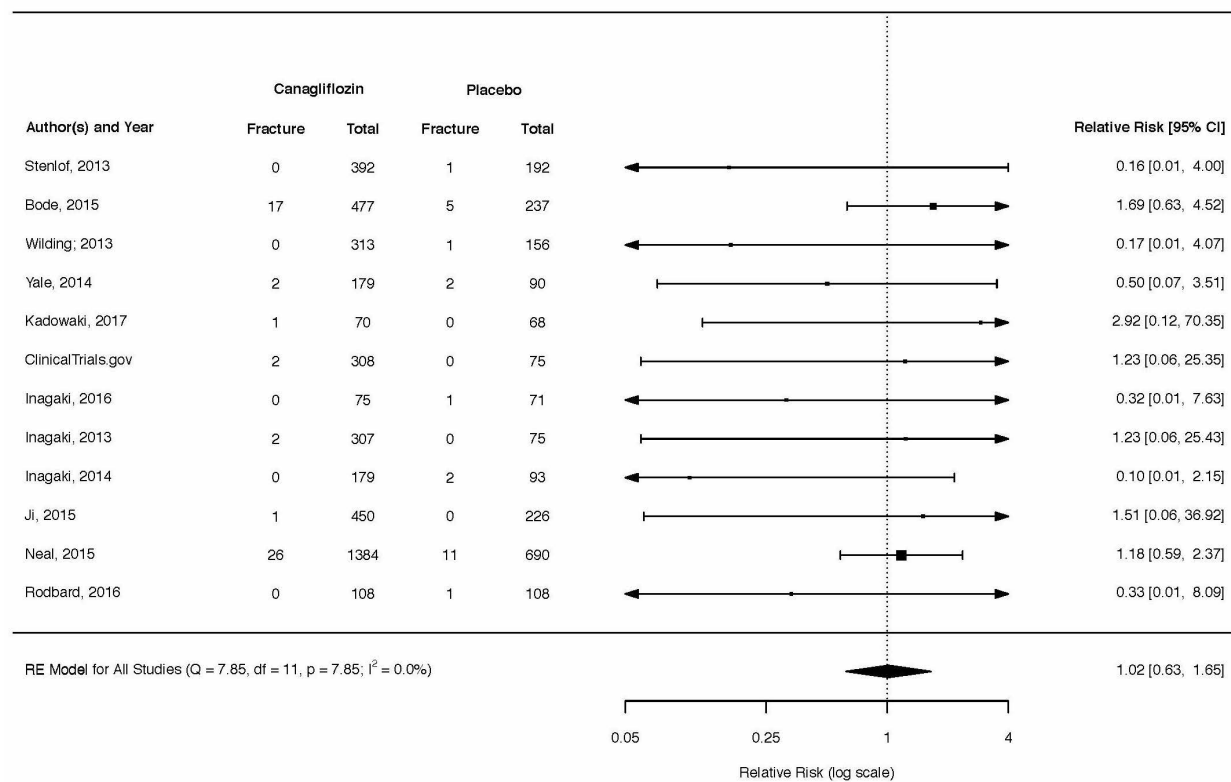

## Section 5: Forest Plots for Fixed Effects Analysis

Figure 8A. Risk of Acute Kidney Injury with SGLT2 Inhibitors compared to Placebo - Fixed Effect Model

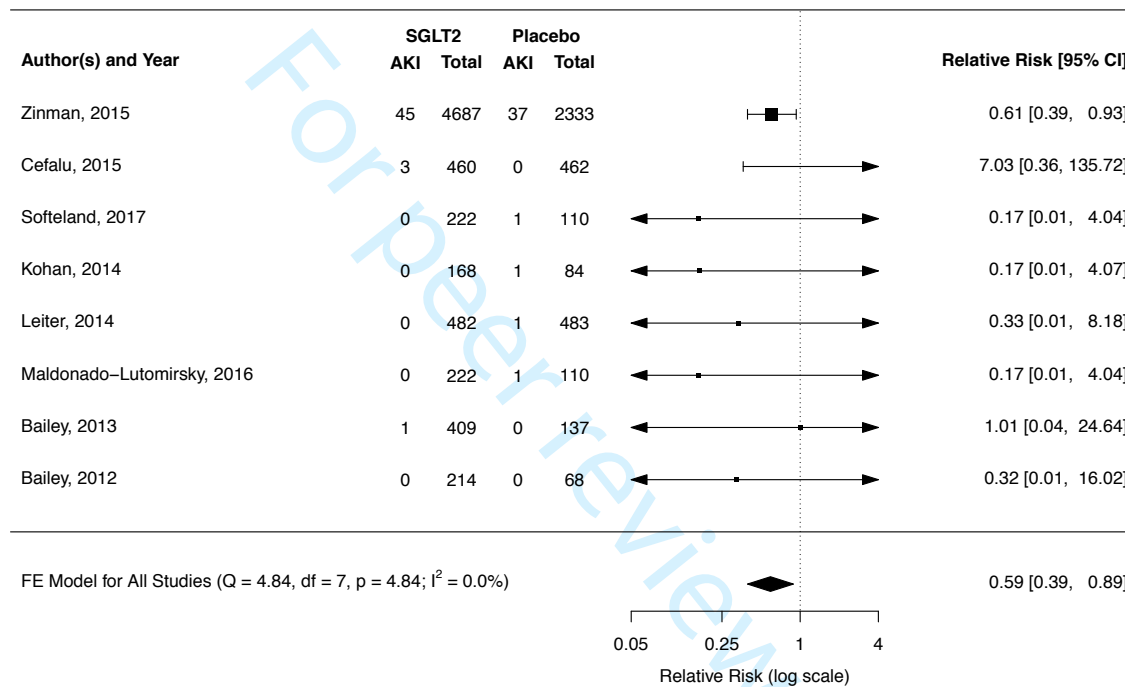

Figure 9A. Risk of Diabetic Ketoacidosis with SGLT2 Inhibitors compared to Placebo - Fixed Effect Model

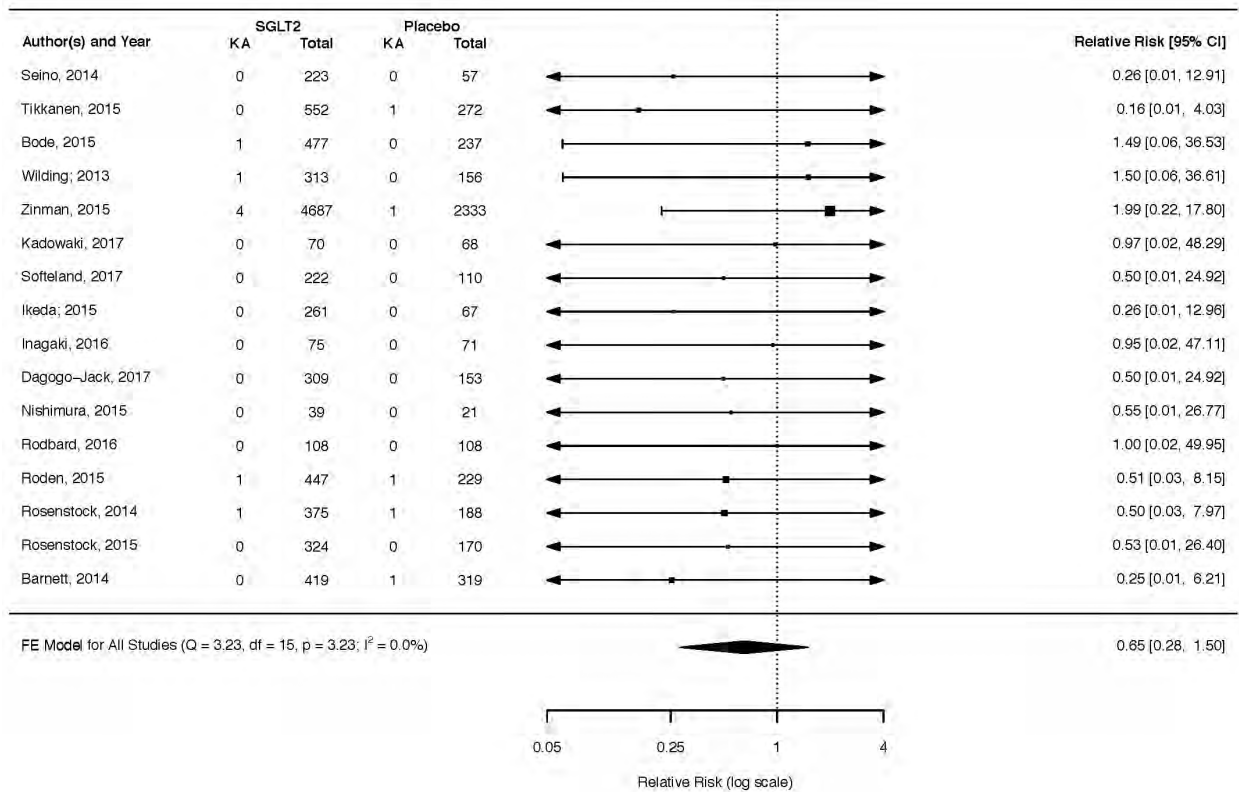

Figure 10A. Risk of Urinary Tract Infection with SGLT2 Inhibitors compared to Placebo - Fixed Effect Model

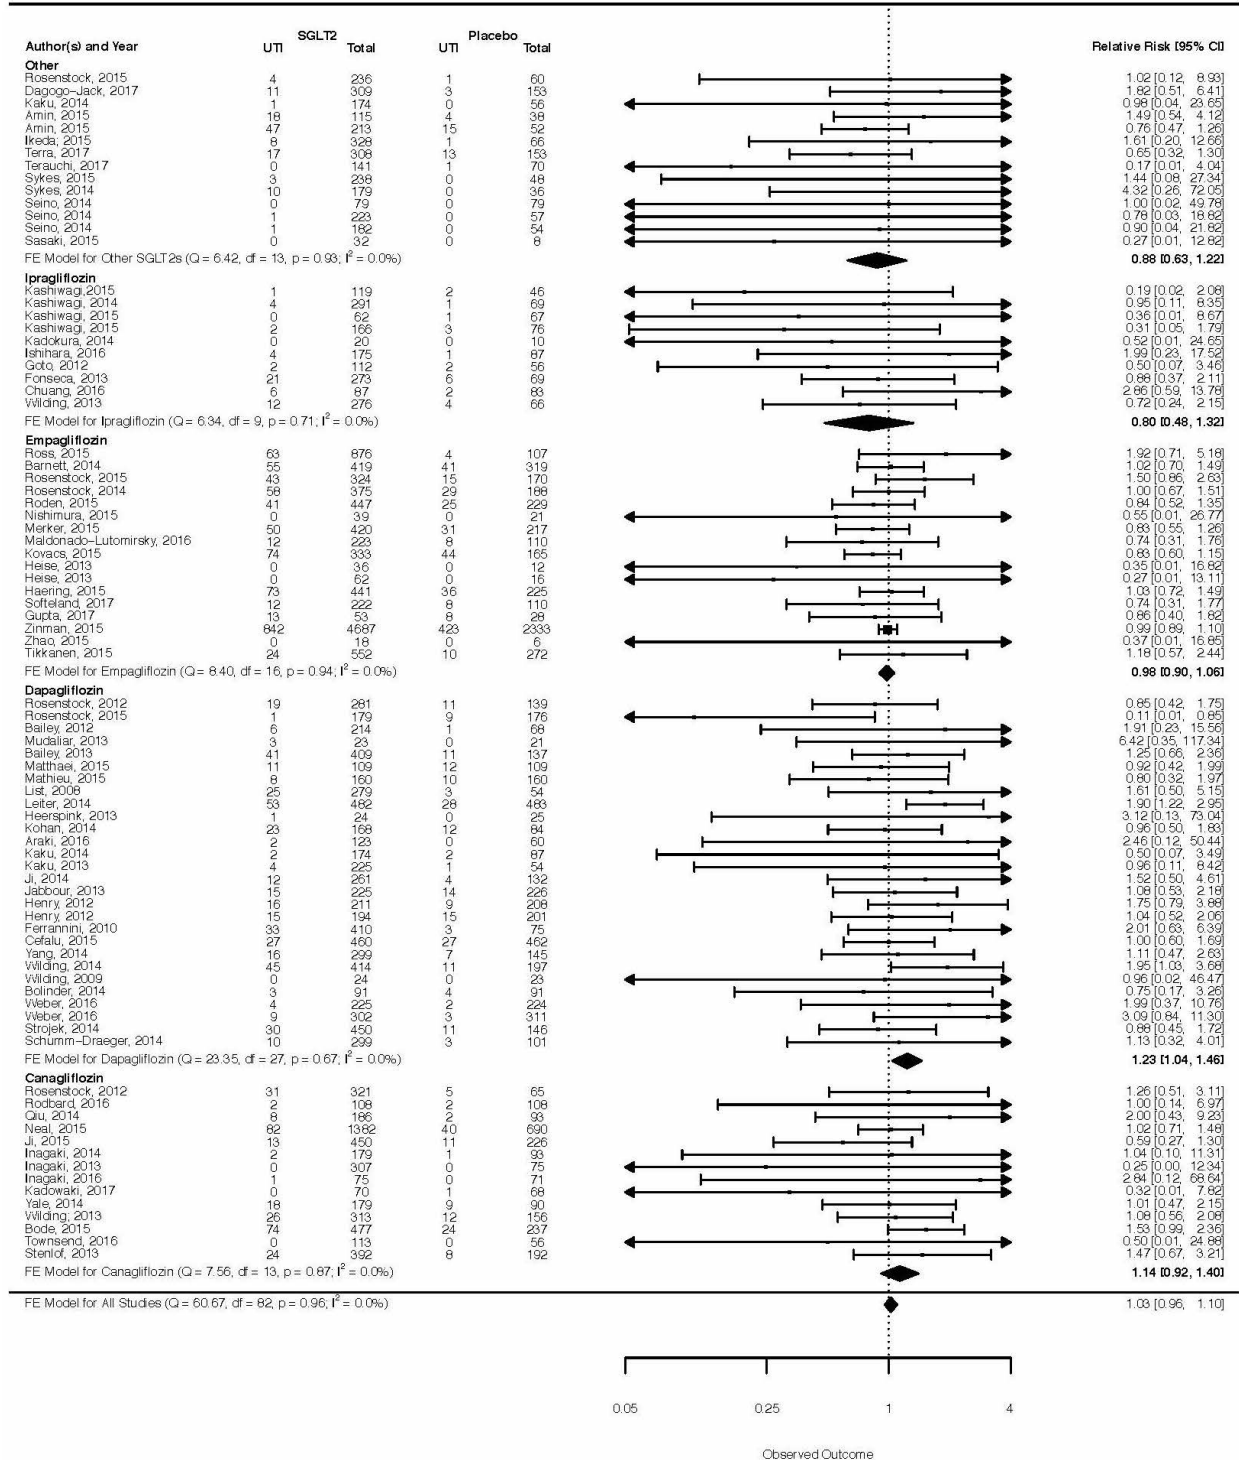



Figure 11A. Risk of Fracture with SGLT2 Inhibitors compared to Placebo - Fixed Effect Model

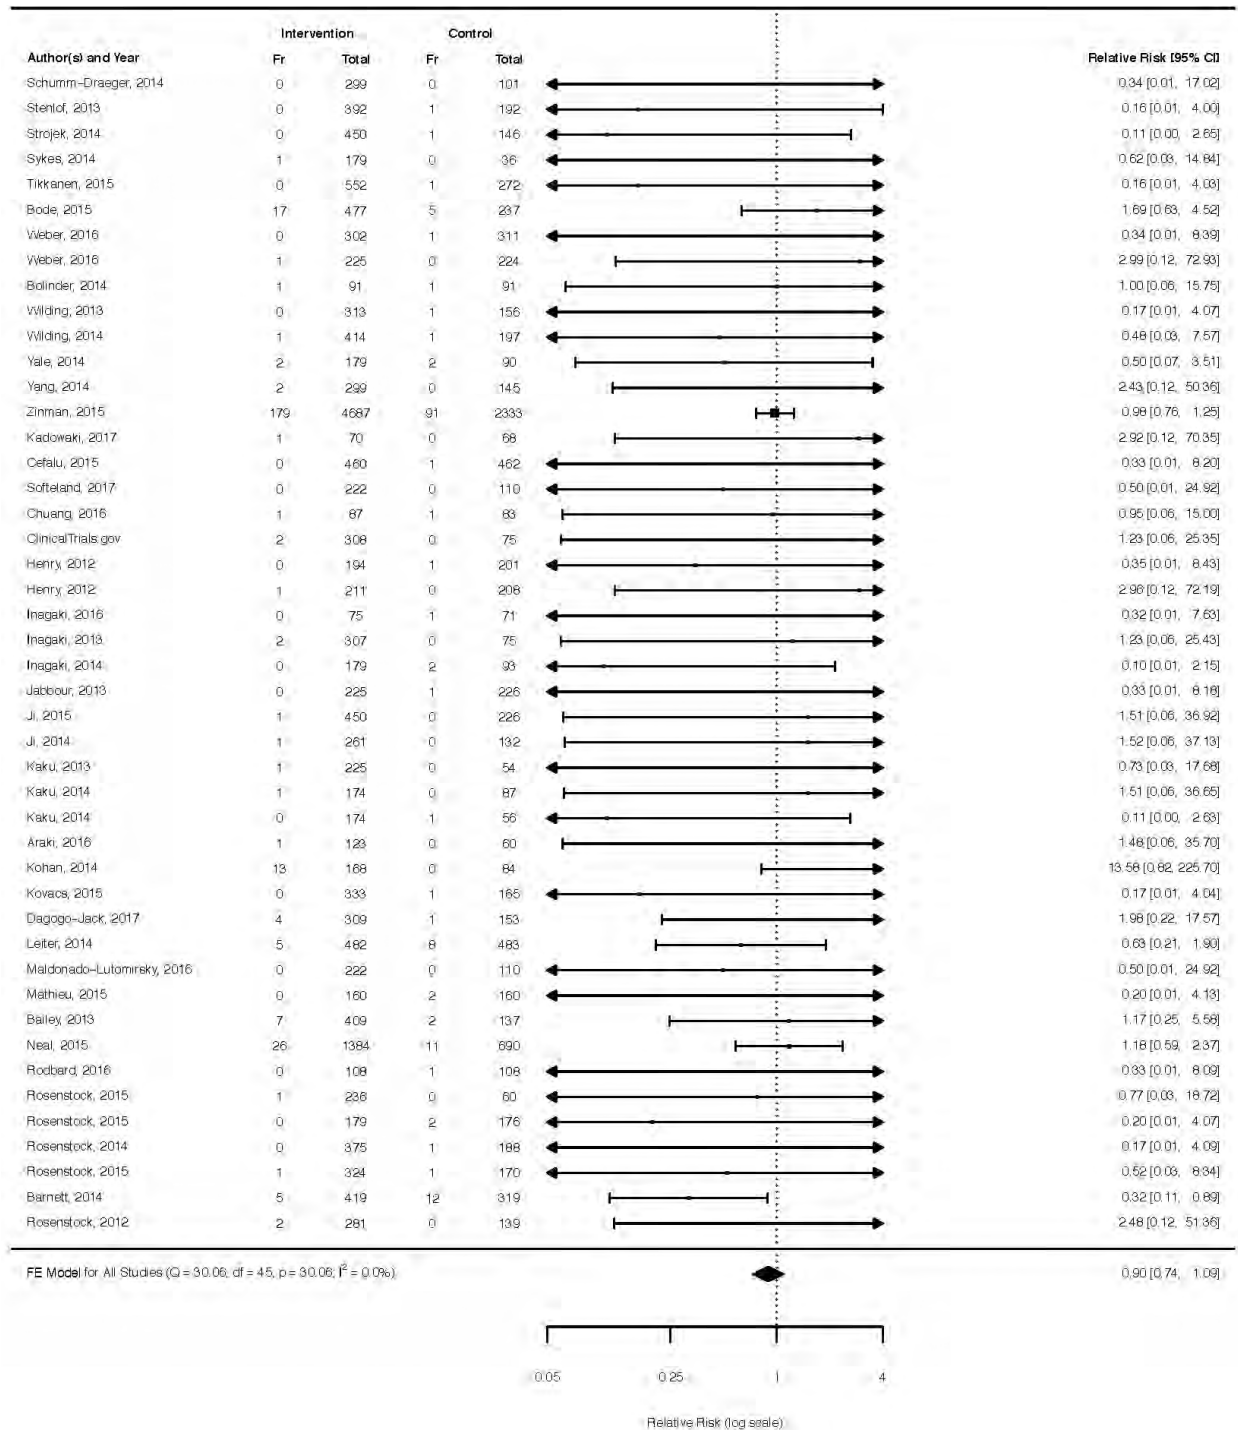

1  
2  
3  
4  
5  
6  
7  
8  
9  
10  
11  
12  
13  
14  
15  
16  
17  
18  
19  
20  
21  
22  
23  
24  
25  
26  
27  
28  
29  
30  
31  
32  
33  
34  
35  
36  
37  
38  
39  
40  
41  
42  
43  
44  
45  
46  
47

**Section 6: Risk of Bias Assessment**

Table 7A. Risk of Bias Assessment for Included Studies

| Author and Year  | NCT#        | Randomization Sequence | Allocation concealment | Double Blinding | Blinded Outcome Assessment | Incomplete Outcome | Selective Reporting | Other        | Overall Assessment |
|------------------|-------------|------------------------|------------------------|-----------------|----------------------------|--------------------|---------------------|--------------|--------------------|
| Amin, 2015       | NCT01059825 | Low Risk               | Low Risk               | Low Risk        | Low Risk                   | Low Risk           | Low Risk            | Low Risk     | low                |
| Amin, 2015       | NCT01059825 | Unclear Risk           | Unclear Risk           | Low Risk        | Unclear Risk               | Low Risk           | Unclear Risk        | Unclear risk | high               |
| Araki, 2016      | NCT02157298 | Unclear Risk           | Low Risk               | Low Risk        | Low Risk                   | Low Risk           | Low Risk            | Unclear risk | low                |
| Araki            | NCT01368081 | Low Risk               | Low Risk               | Medium Risk     | Unclear Risk               | Low Risk           | High Risk           | Unclear risk | high               |
| Bailey, 2013     | NCT00528879 | Low Risk               | Low Risk               | Low Risk        | Low Risk                   | Medium Risk        | Unclear Risk        | Unclear risk | high               |
| Bailey, 2012     | None        | Low Risk               | Low Risk               | Low Risk        | Low Risk                   | Low Risk           | Low Risk            | Low Risk     | low                |
| Barnett, 2014    | NCT01164501 | Low Risk               | Low Risk               | Low Risk        | Low Risk                   | Low Risk           | High Risk           | Unclear risk | high               |
| Bode, 2015       | NCT01106651 | Low Risk               | Low Risk               | Low Risk        | Low Risk                   | Low Risk           | High Risk           | Unclear risk | high               |
| Bolinder, 2014   | NCT00855166 | Low Risk               | Low Risk               | Low Risk        | Low Risk                   | Low Risk           | Low Risk            | Unclear risk | low                |
| Cefalu, 2015     | NCT01031680 | Low Risk               | Low Risk               | Medium Risk     | Low Risk                   | Low Risk           | High Risk           | Low Risk     | high               |
| Chuang, 2016     | NCT01505426 | Low Risk               | Low Risk               | Low Risk        | Low Risk                   | Low Risk           | Low Risk            | Unclear risk | low                |
| DeFronzo, 2015   | NCT01422876 | Low Risk               | Low Risk               | Low Risk        | Unclear Risk               | Low Risk           | Low Risk            | Unclear risk | low                |
| Prato, 2015      | NCT00660907 | Low Risk               | Low Risk               | Low Risk        | Low Risk                   | Low Risk           | High Risk           | Unclear risk | high               |
| Ferrannini, 2013 | NCT00881530 | High Risk              | High Risk              | High Risk       | High Risk                  | Low Risk           | High Risk           | Unclear risk | high               |
| Ferrannini, 2010 | NCT00528372 | Unclear Risk           | Unclear Risk           | Low Risk        | Unclear Risk               | Unclear Risk       | Unclear Risk        | Unclear risk | high               |
| Fonseca, 2013    | NCT01071850 | Unclear Risk           | Low Risk               | Low Risk        | Low Risk                   | Low Risk           | Low Risk            | Unclear risk | low                |
| Frias, 2016      | NCT02229396 | Low Risk               | Low Risk               | Low Risk        | Low Risk                   | Low Risk           | Low Risk            | Unclear risk | low                |
| Hadjadj, 2016    | NCT01719003 | Low Risk               | Low Risk               | Low Risk        | Low Risk                   | Low Risk           | High Risk           | Unclear risk | high               |
| Haering, 2015    | NCT01289990 | Low Risk               | Low Risk               | Low Risk        | Unclear Risk               | Low Risk           | Low Risk            | Unclear risk | low                |
| Heise, 2013      | None        | Low Risk               | Low Risk               | Unclear Risk    | Unclear Risk               | Low Risk           | Unclear Risk        | Unclear risk | high               |
| Heise, 2013      | None        | Unclear Risk           | Low Risk               | Low Risk        | Low Risk                   | Low Risk           | Low Risk            | Unclear risk | low                |
| Henry, 2012      | NCT00643851 | Low Risk               | Low Risk               | Low Risk        | Low Risk                   | Low Risk           | High Risk           | Unclear risk | high               |

|                        |              |              |          |             |              |              |              |              |      |
|------------------------|--------------|--------------|----------|-------------|--------------|--------------|--------------|--------------|------|
| Henry, 2012            | NCT00859898  | Low Risk     | Low Risk | Low Risk    | Low Risk     | Low Risk     | High Risk    | Unclear risk | high |
| Ikeda, 2015            | NCT00800176  | Unclear Risk | Low Risk | Low Risk    | Unclear Risk | Low Risk     | Low Risk     | Unclear risk | high |
| Inagaki, 2016          | NCT02220920  | Low Risk     | Low Risk | Low Risk    | low Risk     | Low Risk     | Low Risk     | Unclear risk | low  |
| Inagaki, 2015          | NCT01387737  | Unclear Risk | Low Risk | High Risk   | High Risk    | Medium Risk  | Unclear Risk | Unclear risk | high |
| Inagaki, 2013          | NCT01022112  | Low Risk     | Low Risk | Low Risk    | Low Risk     | Low Risk     | High Risk    | Unclear risk | high |
| Inagaki, 2014          | NCT01413204  | Low Risk     | Low Risk | Low Risk    | Low Risk     | Low Risk     | High Risk    | Unclear risk | high |
| Ishihara, 2016         | NCT02175784  | Unclear Risk | Low Risk | Medium Risk | Low Risk     | Low Risk     | Low Risk     | Low Risk     | high |
| Jabbour, 2013          | NCT00984867  | Unclear Risk | Low Risk | Medium Risk | Low Risk     | Low Risk     | High Risk    | Unclear risk | high |
| Ji, 2015               | NCT01381900  | Low Risk     | Low Risk | Low Risk    | Low Risk     | Low Risk     | High Risk    | Unclear risk | high |
| Ji, 2014               | NCT01095653  | Low Risk     | Low Risk | Low Risk    | Low Risk     | Low Risk     | High Risk    | Unclear risk | high |
| Kadokura, 2014         | NCT01023945  | Low Risk     | Low Risk | Low Risk    | Low Risk     | Low Risk     | Low Risk     | Unclear risk | low  |
| Kadowaki, 2015         | NCT01193218  | Low Risk     | Low Risk | Low Risk    | Medium Risk  | Low Risk     | High Risk    | Unclear risk | high |
| Kaku, 2013             | NCT00972244  | Low Risk     | Low Risk | Low Risk    | Unclear Risk | Low Risk     | High Risk    | Unclear risk | high |
| Kaku, 2014             | none         | Unclear Risk | low Risk | Low Risk    | Unclear Risk | Medium Risk  | Unclear Risk | Unclear risk | high |
| Kaku, 2014             | None         | Low Risk     | Low Risk | Low Risk    | Low Risk     | Low Risk     | Low Risk     | Unclear risk | low  |
| Kashiwagi, 2015        | NCT01242215  | Low Risk     | Low Risk | Low Risk    | Unclear Risk | Low Risk     | Low Risk     | Unclear risk | low  |
| Kashiwagi, 2015        | NCT01057628. | Low Risk     | Low Risk | Low Risk    | Low Risk     | Low Risk     | Low Risk     | Unclear risk | low  |
| Kashiwagi, 2014        | NCT00621868  | Unclear Risk | Low Risk | Low Risk    | Low Risk     | Low Risk     | Low Risk     | Unclear risk | low  |
| Kashiwagi, 2015        | NCT01316094  | Unclear Risk | Low Risk | Low Risk    | Low Risk     | Low Risk     | Low Risk     | Unclear risk | low  |
| Kohan, 2014            | NCT00663260  | Unclear Risk | Low Risk | Low Risk    | Unclear Risk | Low Risk     | Low Risk     | Unclear risk | high |
| Kovacs, 2015           | NCT01210001  | Low Risk     | Low Risk | Low Risk    | Medium Risk  | Low Risk     | High Risk    | Unclear risk | high |
| Heerspink, 2013        | NCT00976495  | Low Risk     | Low Risk | Low Risk    | Low Risk     | Low Risk     | Low Risk     | Unclear risk | low  |
| Lavalle-Gonzalez, 2013 | NCT01106677  | Low Risk     | Low Risk | Low Risk    | Low Risk     | Low Risk     | High Risk    | Unclear risk | high |
| Leiter, 2014           | NCT01042977  | Low Risk     | Low Risk | Low Risk    | Low Risk     | Unclear Risk | Low Risk     | Unclear risk | low  |
| Leiter, 2015           | NCT00968812  | Low Risk     | Low Risk | Low Risk    | Low Risk     | Low Risk     | High Risk    | Unclear risk | high |
| Lewin, 2015            | NCT01422876  | Unclear Risk | Low Risk | Low Risk    | Low Risk     | Low Risk     | Low Risk     | Low Risk     | low  |
| List, 2008             | NCT00263276  | Unclear Risk | Low Risk | Low Risk    | Low Risk     | Unclear Risk | Low Risk     | Unclear risk | high |

|    |                      |             |              |          |             |              |              |              |              |              |      |
|----|----------------------|-------------|--------------|----------|-------------|--------------|--------------|--------------|--------------|--------------|------|
| 1  |                      |             |              |          |             |              |              |              |              |              |      |
| 2  |                      |             |              |          |             |              |              |              |              |              |      |
| 3  |                      |             |              |          |             |              |              |              |              |              |      |
| 4  |                      |             |              |          |             |              |              |              |              |              |      |
| 5  |                      |             |              |          |             |              |              |              |              |              |      |
| 6  |                      |             |              |          |             |              |              |              |              |              |      |
| 7  |                      |             |              |          |             |              |              |              |              |              |      |
| 8  |                      |             |              |          |             |              |              |              |              |              |      |
| 9  |                      |             |              |          |             |              |              |              |              |              |      |
| 10 |                      |             |              |          |             |              |              |              |              |              |      |
| 11 |                      |             |              |          |             |              |              |              |              |              |      |
| 12 |                      |             |              |          |             |              |              |              |              |              |      |
| 13 |                      |             |              |          |             |              |              |              |              |              |      |
| 14 |                      |             |              |          |             |              |              |              |              |              |      |
| 15 |                      |             |              |          |             |              |              |              |              |              |      |
| 16 |                      |             |              |          |             |              |              |              |              |              |      |
| 17 |                      |             |              |          |             |              |              |              |              |              |      |
| 18 |                      |             |              |          |             |              |              |              |              |              |      |
| 19 |                      |             |              |          |             |              |              |              |              |              |      |
| 20 |                      |             |              |          |             |              |              |              |              |              |      |
| 21 |                      |             |              |          |             |              |              |              |              |              |      |
| 22 |                      |             |              |          |             |              |              |              |              |              |      |
| 23 |                      |             |              |          |             |              |              |              |              |              |      |
| 24 |                      |             |              |          |             |              |              |              |              |              |      |
| 25 |                      |             |              |          |             |              |              |              |              |              |      |
| 26 |                      |             |              |          |             |              |              |              |              |              |      |
| 27 |                      |             |              |          |             |              |              |              |              |              |      |
| 28 |                      |             |              |          |             |              |              |              |              |              |      |
| 29 |                      |             |              |          |             |              |              |              |              |              |      |
| 30 |                      |             |              |          |             |              |              |              |              |              |      |
| 31 |                      |             |              |          |             |              |              |              |              |              |      |
| 32 |                      |             |              |          |             |              |              |              |              |              |      |
| 33 |                      |             |              |          |             |              |              |              |              |              |      |
| 34 |                      |             |              |          |             |              |              |              |              |              |      |
| 35 |                      |             |              |          |             |              |              |              |              |              |      |
| 36 |                      |             |              |          |             |              |              |              |              |              |      |
| 37 |                      |             |              |          |             |              |              |              |              |              |      |
| 38 |                      |             |              |          |             |              |              |              |              |              |      |
| 39 |                      |             |              |          |             |              |              |              |              |              |      |
| 40 |                      |             |              |          |             |              |              |              |              |              |      |
| 41 |                      |             |              |          |             |              |              |              |              |              |      |
| 42 |                      |             |              |          |             |              |              |              |              |              |      |
| 43 |                      |             |              |          |             |              |              |              |              |              |      |
| 44 |                      |             |              |          |             |              |              |              |              |              |      |
| 45 |                      |             |              |          |             |              |              |              |              |              |      |
| 46 |                      |             |              |          |             |              |              |              |              |              |      |
| 47 |                      |             |              |          |             |              |              |              |              |              |      |
|    | Mathieu, 2015        | NCT01646320 | Low Risk     | Low Risk | Low Risk    | Low Risk     | Low Risk     | Low Risk     | Unclear risk | low          |      |
|    | Matthaei, 2015       | NCT01392677 | Low Risk     | Low Risk | Low Risk    | Low Risk     | Low Risk     | Low Risk     | Unclear risk | low          |      |
|    | Mudaliar, 2013       | None        | Unclear Risk | Low Risk | Low Risk    | Low Risk     | Low Risk     | Unclear Risk | Low Risk     | Unclear risk | high |
|    | Nishimura, 2015      | NCT01947855 | Unclear Risk | Low Risk | Low Risk    | Low Risk     | Low Risk     | Low Risk     | Low Risk     | Unclear risk | low  |
|    | Qiu, 2014            | NCT01340664 | Low Risk     | Low Risk | Low Risk    | Low Risk     | Low Risk     | Low Risk     | Low Risk     | Unclear risk | low  |
|    | Rodbard, 2016        | NCT01989754 | Low Risk     | Low Risk | Low Risk    | Low Risk     | Low Risk     | Low Risk     | Low Risk     | Unclear risk | low  |
|    | Roden, 2015          | NCT01289990 | Low Risk     | Low Risk | Low Risk    | Low Risk     | Low Risk     | Low Risk     | High Risk    | Unclear risk | high |
|    | Rosenstock, 2012     | NCT00642278 | Unclear Risk | Low Risk | Low Risk    | Low Risk     | Low Risk     | Low Risk     | Low Risk     | Unclear risk | low  |
|    | Rosenstock, 2015     | NCT01376557 | Unclear Risk | Low Risk | Low Risk    | Low Risk     | Low Risk     | Low Risk     | Low Risk     | Unclear risk | low  |
|    | Rosenstock, 2016     | NCT01809327 | Low Risk     | Low Risk | Low Risk    | Low Risk     | Low Risk     | Low Risk     | High Risk    | Unclear risk | high |
|    | Rosenstock, 2015     | NCT01606007 | Low Risk     | Low Risk | Low Risk    | Low Risk     | Low Risk     | Low Risk     | Low Risk     | Unclear risk | low  |
|    | Rosenstock, 2014     | NCT01306214 | Low Risk     | Low Risk | Low Risk    | Low Risk     | Low Risk     | Low Risk     | High Risk    | Unclear risk | high |
|    | Rosenstock, 2015     | NCT01011868 | Low Risk     | Low Risk | Low Risk    | Low Risk     | Low Risk     | Low Risk     | High Risk    | Unclear risk | high |
|    | Rosenstock, 2012     | NCT00683878 | Unclear Risk | Low Risk | Low Risk    | Low Risk     | Low Risk     | Low Risk     | Low Risk     | Unclear risk | low  |
|    | Ross, 2015           | None        | Unclear Risk | Low Risk | Low Risk    | Low Risk     | Low Risk     | Low Risk     | Low Risk     | Unclear risk | low  |
|    | Sasaki, 2015         | None        | Low Risk     | Low Risk | Medium Risk | High Risk    | Unclear Risk | Unclear Risk | High Risk    | High Risk    | high |
|    | Schernthaner, 2013   | NCT01137812 | Low Risk     | Low Risk | Low Risk    | Low Risk     | Low Risk     | Low Risk     | Low Risk     | Unclear risk | low  |
|    | Schumm-Draeger, 2014 | NCT01217892 | Low Risk     | Low Risk | Low Risk    | Low Risk     | Low Risk     | Low Risk     | Low Risk     | Unclear risk | low  |
|    | Seino, 2014          | None        | Low Risk     | Low Risk | Low Risk    | Low Risk     | Low Risk     | Low Risk     | Low Risk     | Unclear Risk | low  |
|    | Seino, 2014          | None        | Low Risk     | Low Risk | Low Risk    | Low Risk     | Low Risk     | Low Risk     | Low Risk     | Unclear Risk | low  |
|    | Seino, 2014          | None        | Low Risk     | Low Risk | Low Risk    | Low Risk     | Low Risk     | Low Risk     | Low Risk     | Unclear Risk | low  |
|    | Stenlof, 2013        | NCT01081834 | Unclear Risk | Low Risk | Low Risk    | Unclear Risk | Low Risk     | Low Risk     | Low Risk     | Unclear Risk | high |
|    | Strojek, 2014        | NCT00680745 | Low Risk     | Low Risk | Low Risk    | Low Risk     | Low Risk     | Low Risk     | High Risk    | Unclear Risk | high |
|    | Sykes, 2015          | NCT00500331 | Unclear Risk | Low Risk | Low Risk    | Low Risk     | Low Risk     | Low Risk     | Low Risk     | Unclear Risk | low  |
|    | Tikkanen, 2015       | NCT01370005 | Medium Risk  | Low Risk | Low Risk    | Low Risk     | Low Risk     | Low Risk     | Low Risk     | Unclear Risk | high |
|    | Townsend, 2016       | None        | Unclear Risk | Low Risk | Low Risk    | Low Risk     | Low Risk     | Low Risk     | Low Risk     | Unclear Risk | low  |
|    | Seman, 2016          | None        | Unclear Risk | Low Risk | High Risk   | High Risk    | Unclear Risk | Unclear Risk | Unclear Risk | Unclear Risk | high |

|    |                            |             |              |          |           |              |             |           |              |      |
|----|----------------------------|-------------|--------------|----------|-----------|--------------|-------------|-----------|--------------|------|
| 1  | Weber, 2016                | NCT01137474 | Low Risk     | Low Risk | Low Risk  | Low Risk     | Medium Risk | High Risk | Unclear Risk | high |
| 2  | Weber, 2016                | NCT01195662 | Low Risk     | Low Risk | Low Risk  | Low Risk     | Low Risk    | High Risk | Unclear Risk | high |
| 3  | Wilding; 2013              | NCT01106625 | Low Risk     | Low Risk | Low Risk  | Low Risk     | Low Risk    | High Risk | Unclear Risk | high |
| 4  | Wilding, 2013              | NCT01117584 | Unclear Risk | Low Risk | Low Risk  | Low Risk     | Low Risk    | Low Risk  | Unclear Risk | low  |
| 5  | Wilding, 2009              | NCT00357370 | Unclear Risk | Low Risk | Low Risk  | Low Risk     | Low Risk    | Low Risk  | Unclear Risk | low  |
| 6  | Wilding, 2014              | NCT00673231 | Low Risk     | Low Risk | Low Risk  | Low Risk     | Low Risk    | High Risk | Unclear Risk | high |
| 7  | Yale, 2014                 | NCT01064414 | Unclear Risk | Low Risk | Low Risk  | Low Risk     | Low Risk    | Low Risk  | Unclear Risk | low  |
| 8  | Zhao, 2015                 | NCT01316341 | Medium Risk  | Low Risk | Low Risk  | Low Risk     | Low Risk    | Low Risk  | Unclear Risk | high |
| 9  | Zinman, 2015               | NCT01131676 | Low Risk     | Low Risk | Low Risk  | Low Risk     | Low Risk    | Low Risk  | Low Risk     | low  |
| 10 | Goto, 2012                 | None        | Unclear Risk | Low Risk | Low Risk  | Unclear Risk | Low Risk    | Low Risk  | Unclear risk | high |
| 11 | Dagogo-Jack, 2017          | NCT02036515 | Low Risk     | Low Risk | Low Risk  | Unclear Risk | Low Risk    | Low Risk  | Unclear risk | low  |
| 12 | Maldonado-Lutomirsky, 2016 | NCT01734785 | Unclear Risk | Low Risk | Low Risk  | Unclear Risk | Low Risk    | Low Risk  | Unclear risk | high |
| 13 | Merker, 2015               | NCT01289990 | Unclear Risk | Low Risk | Low Risk  | Low Risk     | Low Risk    | Low Risk  | Unclear Risk | low  |
| 14 | Neal, 2015                 | NCT01032629 | Low Risk     | Low Risk | Low Risk  | Low Risk     | Low Risk    | Low Risk  | Unclear risk | low  |
| 15 | Ridderstrale, 2014         | NCT01167881 | Low Risk     | Low Risk | Low Risk  | Low Risk     | Low Risk    | Low Risk  | Unclear Risk | low  |
| 16 | Sykes, 2014                | NCT00495469 | Low Risk     | Low Risk | Low Risk  | Low Risk     | Low Risk    | Low Risk  | Unclear Risk | low  |
| 17 | Tanizawa, 2014             | None        | Low Risk     | Low Risk | High Risk | High Risk    | Low Risk    | Low Risk  | Unclear Risk | high |
| 18 | Yang, 2014                 | NCT01095666 | Unclear Risk | Low Risk | Low Risk  | Low Risk     | Low Risk    | Low Risk  | Unclear Risk | low  |
| 19 | Gupta, 2017                | None        | Low Risk     | Low Risk | Low Risk  | Low Risk     | Low Risk    | Low Risk  | Unclear Risk | low  |
| 20 | Kadowaki, 2017             | NCT02354235 | Low Risk     | Low Risk | Low Risk  | Low Risk     | Low Risk    | Low Risk  | Unclear Risk | low  |
| 21 | Softeland, 2017            | NCT01734785 | Low Risk     | Low Risk | Low Risk  | Low Risk     | Low Risk    | Low Risk  | Unclear Risk | low  |
| 22 | Terra, 2017                | NCT01958671 | Low Risk     | Low Risk | Low Risk  | Low Risk     | Low Risk    | Low Risk  | Unclear Risk | low  |
| 23 | ClinicalTrials.gov         |             | Low Risk     | Low Risk | Low Risk  | Low Risk     | Low Risk    | Low Risk  | Unclear Risk | low  |
| 24 | Terauchi, 2017             | NCT02201004 | Low Risk     | Low Risk | Low Risk  | Low Risk     | Low Risk    | Low Risk  | Unclear Risk | low  |
| 25 |                            |             |              |          |           |              |             |           |              |      |
| 26 |                            |             |              |          |           |              |             |           |              |      |
| 27 |                            |             |              |          |           |              |             |           |              |      |
| 28 |                            |             |              |          |           |              |             |           |              |      |
| 29 |                            |             |              |          |           |              |             |           |              |      |
| 30 |                            |             |              |          |           |              |             |           |              |      |
| 31 |                            |             |              |          |           |              |             |           |              |      |
| 32 |                            |             |              |          |           |              |             |           |              |      |
| 33 |                            |             |              |          |           |              |             |           |              |      |
| 34 |                            |             |              |          |           |              |             |           |              |      |
| 35 |                            |             |              |          |           |              |             |           |              |      |
| 36 |                            |             |              |          |           |              |             |           |              |      |
| 37 |                            |             |              |          |           |              |             |           |              |      |
| 38 |                            |             |              |          |           |              |             |           |              |      |
| 39 |                            |             |              |          |           |              |             |           |              |      |
| 40 |                            |             |              |          |           |              |             |           |              |      |
| 41 |                            |             |              |          |           |              |             |           |              |      |
| 42 |                            |             |              |          |           |              |             |           |              |      |
| 43 |                            |             |              |          |           |              |             |           |              |      |
| 44 |                            |             |              |          |           |              |             |           |              |      |
| 45 |                            |             |              |          |           |              |             |           |              |      |
| 46 |                            |             |              |          |           |              |             |           |              |      |
| 47 |                            |             |              |          |           |              |             |           |              |      |

1  
2  
3  
4  
5  
6  
7  
8  
9  
10  
11  
12  
13  
14  
15  
16  
17  
18  
19  
20  
21  
22  
23  
24  
25  
26  
27  
28  
29  
30  
31  
32  
33  
34  
35  
36  
37  
38  
39  
40  
41  
42  
43  
44  
45  
46  
47  
48  
49  
50  
51  
52  
53  
54  
55  
56  
57  
58  
59  
60

Figure 12A. Risk of Acute Kidney Injury with SGLT2 Inhibitors compared to Placebo - Fixed Effect Model

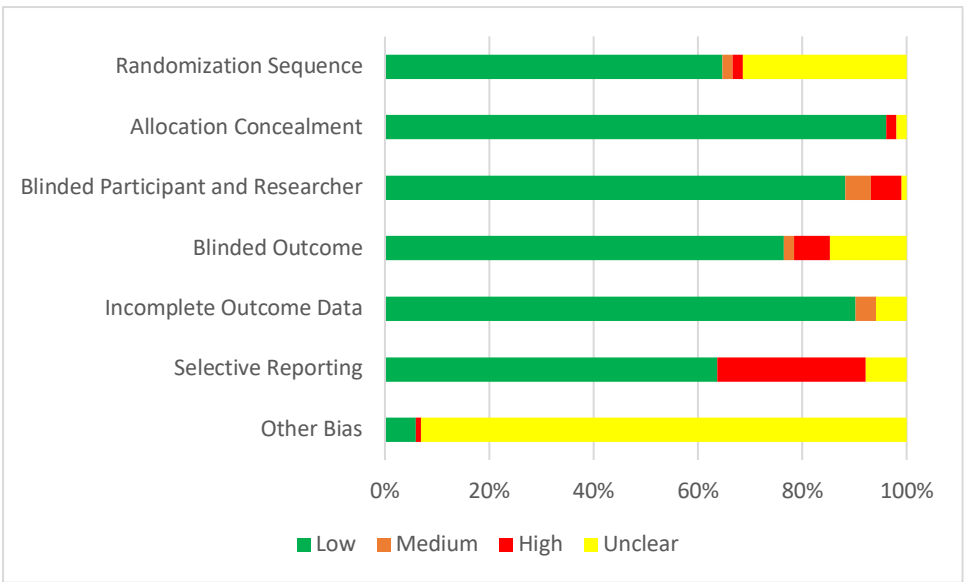

**Section 7: Assessment of Publication Bias**

Figure 13A. Funnel Plot for Placebo Controlled Trials: Acute Kidney Injury

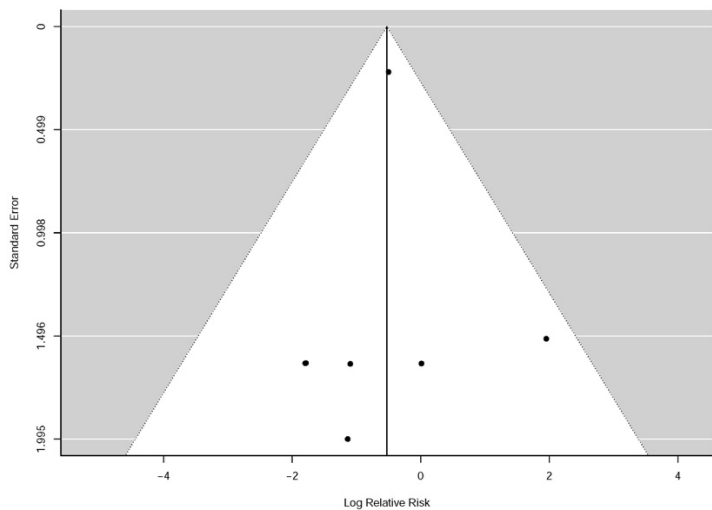

Figure 14A. Funnel Plot for Placebo Controlled Trials: Urinary Tract Infection

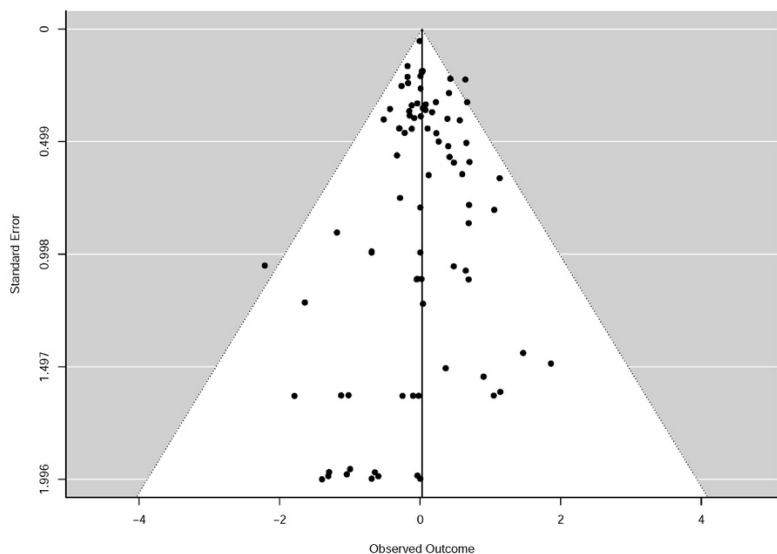



1  
2  
3  
4  
5  
6  
7  
8  
9  
10  
11  
12  
13  
14  
15  
16  
17  
18  
19  
20  
21  
22  
23  
24  
25  
26  
27  
28  
29  
30  
31  
32  
33  
34  
35  
36  
37  
38  
39  
40  
41  
42  
43  
44  
45  
46  
47  
48  
49  
50  
51  
52  
53  
54  
55  
56  
57  
58  
59  
60

Figure 15A. Funnel Plot for Metformin Controlled Trials: Urinary Tract Infection

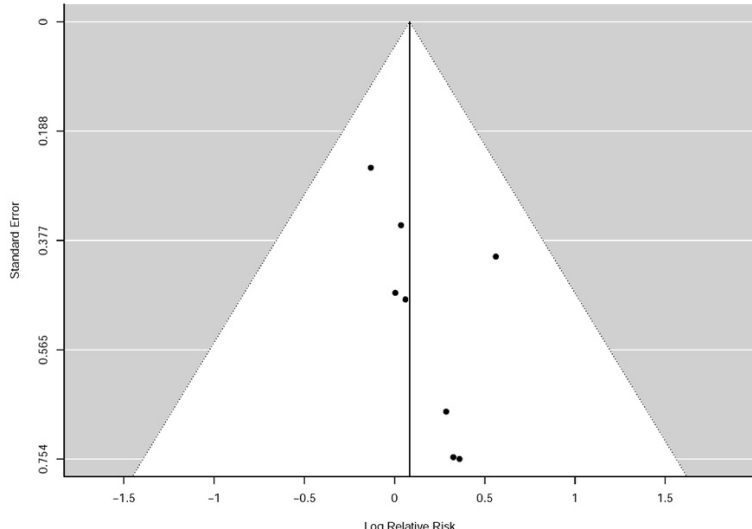

Figure 16A. Funnel Plot for Sulfonylurea Controlled Trials: Urinary Tract Infection

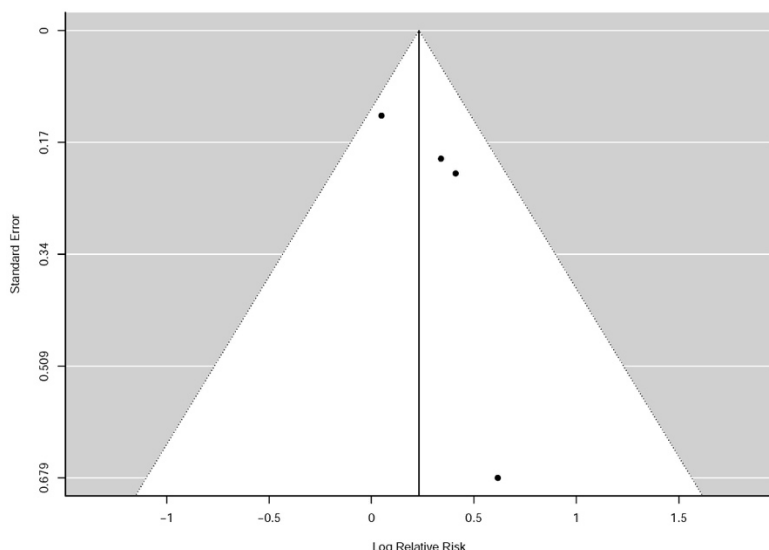

Figure 17A. Funnel Plot for Incretin Controlled Trials: Urinary Tract Infection

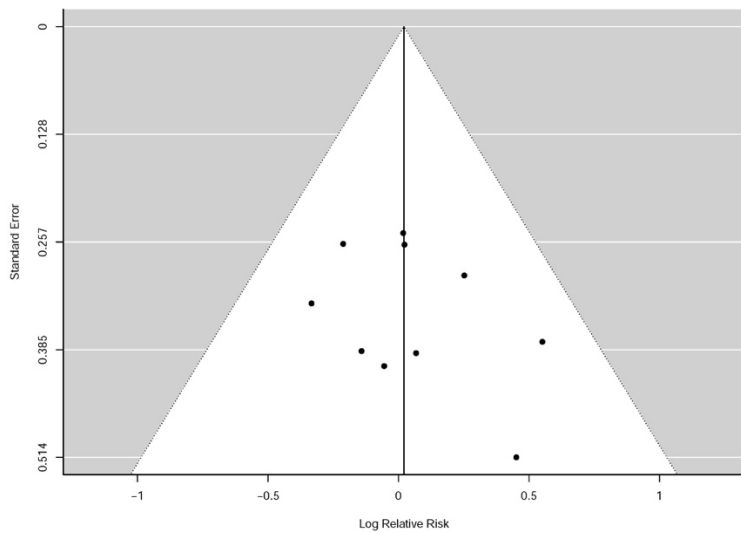

Figure 18A. Funnel Plot for Placebo Controlled Trials: Fracture

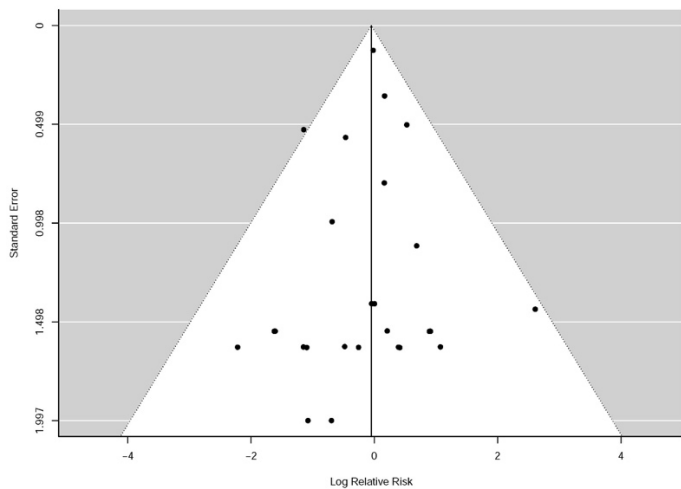

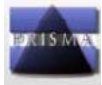

# PRISMA 2009 Checklist

| Section/topic                      | #  | Checklist item                                                                                                                                                                                                                                                                                              | Reported on page # |
|------------------------------------|----|-------------------------------------------------------------------------------------------------------------------------------------------------------------------------------------------------------------------------------------------------------------------------------------------------------------|--------------------|
| <b>TITLE</b>                       |    |                                                                                                                                                                                                                                                                                                             |                    |
| Title                              | 1  | Identify the report as a systematic review, meta-analysis, or both.                                                                                                                                                                                                                                         | 1                  |
| <b>ABSTRACT</b>                    |    |                                                                                                                                                                                                                                                                                                             |                    |
| Structured summary                 | 2  | Provide a structured summary including, as applicable: background; objectives; data sources; study eligibility criteria, participants, and interventions; study appraisal and synthesis methods; results; limitations; conclusions and implications of key findings; systematic review registration number. | 2                  |
| <b>INTRODUCTION</b>                |    |                                                                                                                                                                                                                                                                                                             |                    |
| Rationale                          | 3  | Describe the rationale for the review in the context of what is already known.                                                                                                                                                                                                                              | 4-5                |
| Objectives                         | 4  | Provide an explicit statement of questions being addressed with reference to participants, interventions, comparisons, outcomes, and study design (PICOS).                                                                                                                                                  | 5                  |
| <b>METHODS</b>                     |    |                                                                                                                                                                                                                                                                                                             |                    |
| Protocol and registration          | 5  | Indicate if a review protocol exists, if and where it can be accessed (e.g., Web address), and, if available, provide registration information including registration number.                                                                                                                               | 5                  |
| Eligibility criteria               | 6  | Specify study characteristics (e.g., PICOS, length of follow-up) and report characteristics (e.g., years considered, language, publication status) used as criteria for eligibility, giving rationale.                                                                                                      | 6                  |
| Information sources                | 7  | Describe all information sources (e.g., databases with dates of coverage, contact with study authors to identify additional studies) in the search and date last searched.                                                                                                                                  | 5                  |
| Search                             | 8  | Present full electronic search strategy for at least one database, including any limits used, such that it could be repeated.                                                                                                                                                                               | Appendix           |
| Study selection                    | 9  | State the process for selecting studies (i.e., screening, eligibility, included in systematic review, and, if applicable, included in the meta-analysis).                                                                                                                                                   | 6                  |
| Data collection process            | 10 | Describe method of data extraction from reports (e.g., piloted forms, independently, in duplicate) and any processes for obtaining and confirming data from investigators.                                                                                                                                  | 6                  |
| Data items                         | 11 | List and define all variables for which data were sought (e.g., PICOS, funding sources) and any assumptions and simplifications made.                                                                                                                                                                       | Appendix           |
| Risk of bias in individual studies | 12 | Describe methods used for assessing risk of bias of individual studies (including specification of whether this was done at the study or outcome level), and how this information is to be used in any data synthesis.                                                                                      | 7                  |
| Summary measures                   | 13 | State the principal summary measures (e.g., risk ratio, difference in means).                                                                                                                                                                                                                               | 7                  |
| Synthesis of results               | 14 | Describe the methods of handling data and combining results of studies, if done, including measures of consistency (e.g., $I^2$ ) for each meta-analysis.                                                                                                                                                   | 7                  |

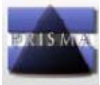

# PRISMA 2009 Checklist

| Section/topic                 | #  | Checklist item                                                                                                                                                                                           | Reported on page #    |
|-------------------------------|----|----------------------------------------------------------------------------------------------------------------------------------------------------------------------------------------------------------|-----------------------|
| Risk of bias across studies   | 15 | Specify any assessment of risk of bias that may affect the cumulative evidence (e.g., publication bias, selective reporting within studies).                                                             | 7                     |
| Additional analyses           | 16 | Describe methods of additional analyses (e.g., sensitivity or subgroup analyses, meta-regression), if done, indicating which were pre-specified.                                                         | 7                     |
| <b>RESULTS</b>                |    |                                                                                                                                                                                                          |                       |
| Study selection               | 17 | Give numbers of studies screened, assessed for eligibility, and included in the review, with reasons for exclusions at each stage, ideally with a flow diagram.                                          | 8, figure 1           |
| Study characteristics         | 18 | For each study, present characteristics for which data were extracted (e.g., study size, PICOS, follow-up period) and provide the citations.                                                             | Appendix              |
| Risk of bias within studies   | 19 | Present data on risk of bias of each study and, if available, any outcome level assessment (see item 12).                                                                                                | Appendix              |
| Results of individual studies | 20 | For all outcomes considered (benefits or harms), present, for each study: (a) simple summary data for each intervention group (b) effect estimates and confidence intervals, ideally with a forest plot. | figures 2-6, appendix |
| Synthesis of results          | 21 | Present results of each meta-analysis done, including confidence intervals and measures of consistency.                                                                                                  | 8-9                   |
| Risk of bias across studies   | 22 | Present results of any assessment of risk of bias across studies (see Item 15).                                                                                                                          | Figure 7              |
| Additional analysis           | 23 | Give results of additional analyses, if done (e.g., sensitivity or subgroup analyses, meta-regression [see Item 16]).                                                                                    | 9                     |
| <b>DISCUSSION</b>             |    |                                                                                                                                                                                                          |                       |
| Summary of evidence           | 24 | Summarize the main findings including the strength of evidence for each main outcome; consider their relevance to key groups (e.g., healthcare providers, users, and policy makers).                     | 10                    |
| Limitations                   | 25 | Discuss limitations at study and outcome level (e.g., risk of bias), and at review-level (e.g., incomplete retrieval of identified research, reporting bias).                                            | 12                    |
| Conclusions                   | 26 | Provide a general interpretation of the results in the context of other evidence, and implications for future research.                                                                                  | 13                    |
| <b>FUNDING</b>                |    |                                                                                                                                                                                                          |                       |
| Funding                       | 27 | Describe sources of funding for the systematic review and other support (e.g., supply of data); role of funders for the systematic review.                                                               | 13                    |

From: Moher D, Liberati A, Tetzlaff J, Altman DG, The PRISMA Group (2009). Preferred Reporting Items for Systematic Reviews and Meta-Analyses: The PRISMA Statement. PLoS Med 6(6): e1000097. doi:10.1371/journal.pmed1000097

For more information, visit: [www.prisma-statement.org](http://www.prisma-statement.org).

# BMJ Open

## Comparative safety of the sodium glucose co-transporter 2 (SGLT2) inhibitors: A systematic review and meta-analysis.

|                                 |                                                                                                                                                                                                                                                                                                                                                                                                                                                                                                                                                                                                                                                                                                                        |
|---------------------------------|------------------------------------------------------------------------------------------------------------------------------------------------------------------------------------------------------------------------------------------------------------------------------------------------------------------------------------------------------------------------------------------------------------------------------------------------------------------------------------------------------------------------------------------------------------------------------------------------------------------------------------------------------------------------------------------------------------------------|
| Journal:                        | <i>BMJ Open</i>                                                                                                                                                                                                                                                                                                                                                                                                                                                                                                                                                                                                                                                                                                        |
| Manuscript ID                   | bmjopen-2018-022577.R1                                                                                                                                                                                                                                                                                                                                                                                                                                                                                                                                                                                                                                                                                                 |
| Article Type:                   | Research                                                                                                                                                                                                                                                                                                                                                                                                                                                                                                                                                                                                                                                                                                               |
| Date Submitted by the Author:   | 14-Jun-2018                                                                                                                                                                                                                                                                                                                                                                                                                                                                                                                                                                                                                                                                                                            |
| Complete List of Authors:       | Donnan, Jennifer; Memorial University of Newfoundland, Pharmacy<br>Grandy, Catherine; Memorial University of Newfoundland, Pharmacy<br>Chibrikov, Eugene; Memorial University of Newfoundland, Medicine<br>Marra, Carlo; University of Otago, Pharmacy<br>Aubrey-Bassler, Kris; Memorial University, Primary Healthcare Research Unit<br>Johnston, Karissa; Memorial University of Newfoundland, Pharmacy<br>Swab, Michelle; Memorial University of Newfoundland<br>Hache, Jenna; Memorial University of Newfoundland, Pharmacy<br>Curnew, Daniel; Memorial University, Pharmacy<br>Hai, van Nguyen; Memorial University of Newfoundland, School of Pharmacy<br>Gamble, John Michael; University of Waterloo, Pharmacy |
| <b>Primary Subject Heading</b>: | Diabetes and endocrinology                                                                                                                                                                                                                                                                                                                                                                                                                                                                                                                                                                                                                                                                                             |
| Secondary Subject Heading:      | Epidemiology, Pharmacology and therapeutics                                                                                                                                                                                                                                                                                                                                                                                                                                                                                                                                                                                                                                                                            |
| Keywords:                       | DIABETES & ENDOCRINOLOGY, EPIDEMIOLOGY, THERAPEUTICS, Adverse events < THERAPEUTICS                                                                                                                                                                                                                                                                                                                                                                                                                                                                                                                                                                                                                                    |
|                                 |                                                                                                                                                                                                                                                                                                                                                                                                                                                                                                                                                                                                                                                                                                                        |

SCHOLARONE™  
Manuscripts

1  
2 **Comparative safety of the sodium glucose co-transporter 2 (SGLT2) inhibitors: A**  
3 **systematic review and meta-analysis.**  
4

5  
6 Short Running Title: Comparative Safety of SGLT2 Inhibitors  
7

8 Jennifer R. Donnan<sup>1</sup>, Jennifer.donnan@mun.ca  
9 Catherine Grandy<sup>1</sup>, cag771@mun.ca  
10 Eugene Chibrikov<sup>1</sup>, eugenec@mun.ca  
11 Carlo A. Marra<sup>1,2</sup>, carlo.marra@otago.ac.nz  
12 Kris Aubrey-Bassler<sup>3</sup>, kaubrey@mun.ca  
13 Karissa Johnston<sup>1</sup>, kjohnston@broadstreetheor.com  
14 Michelle Swab<sup>3</sup>, mswab@mun.ca  
15 Jenna Hache<sup>1</sup>, jrh835@mun.ca  
16 Daniel Curnew<sup>1</sup>, daniel.curnew@gmail.com  
17 Hai Nguyen<sup>1</sup>, hvnguyen@mun.ca  
18 John-Michael Gamble<sup>1,4</sup>, jm.gamble@uwaterloo.ca  
19  
20  
21  
22  
23

24 <sup>1</sup> School of Pharmacy, Memorial University, St. John's, Newfoundland and Labrador, Canada.

25 <sup>2</sup> School of Pharmacy, University of Otago, Dunedin, New Zealand.

26 <sup>3</sup> Faculty of Medicine, Memorial University, St. John's, Newfoundland and Labrador, Canada.

27 <sup>4</sup> School of Pharmacy, Faculty of Science, University of Waterloo, Waterloo, Ontario, Canada.  
28  
29  
30

31 Corresponding Author: John-Michael Gamble  
32 School of Pharmacy  
33 University of Waterloo  
34 10A Victoria Street S  
35 Kitchener, ON, Canada N2G 1C5  
36 Phone: (519) 888-4567 Fax: (519) 883-7580  
37 jm.gamble@uwaterloo.ca  
38  
39  
40  
41  
42

43 **Key Words:** Type 2 Diabetes, SGLT2 Inhibitors, Adverse Events, Systematic Review  
44

45 **Word Count**

46 Abstract: 299 Main Text: 4,479  
47  
48  
49  
50  
51  
52  
53  
54  
55  
56  
57  
58  
59  
60

## Abstract

**Objective:** To estimate the association between the use of sodium glucose co-transporter-2 (SGLT2) inhibitors and post-market harms as identified by drug regulatory agencies.

**Design:** We conducted a systematic review and meta-analysis of randomized controlled trials (RCT). Six large databases were searched from inception to May 2018. Random effects models were used to estimate pooled relative risks.

**Intervention:** SGLT2 Inhibitors, compared to placebo or active comparators.

**Primary Outcomes:** Acute kidney injury (AKI), diabetic ketoacidosis (DKA), urinary tract infections (UTI), bone fractures, and lower-limb amputations.

**Results:** We screened 2418 citations of which 109 were included. Most studies included one of four SGLT2 inhibitors, dapagliflozin, canagliflozin, empagliflozin, and ipragliflozin. When compared to placebo, SGLT2 inhibitors were found to be significantly protective against AKI (RR = 0.59; 95% CI 0.39-0.89;  $I^2=0.0\%$ ), while no difference was found for DKA (RR 0.66; 95% CI 0.30- 1.45,  $I^2 = 0.0\%$ ), UTI (RR 1.02; 95% CI 0.95-1.09,  $I^2 = 0.0\%$ ), or bone fracture (RR 0.87; 95% CI 0.69-1.09,  $I^2 = 1.3\%$ ). Three studies reported on amputation, with one finding a significant increase risk. No increased risk for either outcome was found when compared to active controls. Sub-group analysis did show an increased risk of UTI with dapagliflozin only (RR 1.21; 95% CI 1.02-1.43,  $I^2 = 0.0\%$ ), but no other analysis supported an increased risk of AKI, DKA, UTI, or fracture.

**Conclusions:** Current evidence from RCTs does not suggest an increased risk of harm with SGLT2 inhibitors as a class over placebo or active comparators with respect to the AKI, DKA, UTI or fracture. However, wide confidence intervals for many comparisons suggest limited precision, and therefore clinically important adverse events cannot be ruled out. Dapagliflozin, appears to independently increase the risk of UTI, although the mechanism for this intraclass variation in risk is unclear.

**Trial Registration:** PROSPERO CRD42016038715



## Article Summary

- Our objective is to summarize the current state of knowledge surrounding key post-market safety concerns of the SGLT2 inhibitors compared to active and non-active comparators in patients with type 2 diabetes.

### *Strengths and Limitations of the Study*

- This study provides a comprehensive systematic review of the serious adverse events related to use of SGLT2 inhibitors identified by major drug regulatory agencies worldwide to date.
- This study only considered select outcomes to provide focused attention on the issues concerning regulators, however this means that additional knowledge of the clinical benefits and harms needs to be considered before applying the results of this study.
- Several of the outcomes (e.g., AKI, DKA, limb amputations) we evaluated occur infrequently and, in some cases, were not reported at all.
- Certain outcomes may have been inadequately characterized within study reports. For example, while UTIs were commonly reported among RCTs included in this meta-analysis, data on complicated versus uncomplicated infections were not.

## 1.0 Introduction

The sodium glucose co-transporter 2 (SGLT2) inhibitors are a novel drug class available for the management of type 2 diabetes. Clinical guidelines recommend the SGLT2 inhibitors as one of numerous potential pharmacologic approaches for second-line therapy following metformin failure or intolerance.[1, 2] Some clinical guidelines recommend the SGLT2 inhibitor, empagliflozin, or the Glucagon-like peptide-1 (GLP-1) receptor agonist, liraglutide, as preferred second-line therapies in patients with cardiovascular disease who have failed to achieve glycemic control while on monotherapy.[1] This paradigm shift in the management of type 2 diabetes is largely supported by evidence from recent landmark clinical trials.[3–5] In 2015 the EMPA-REG trial showed that the SGLT2 inhibitor, empagliflozin, significantly reduced the risk for composite endpoint of cardiovascular death, myocardial infarction, or stroke by 14% and all-cause mortality by 32%, in a population with existing cardiovascular disease.[5] The LEADER and SUSTAIN-6 trials have also demonstrated similar benefits with liraglutide and semaglutide.[3, 4]

Considering the relative potential harms and benefits, clinicians and policy makers must continue to integrate new pharmacotherapeutic evidence to optimize health outcomes. Although the EMPA-REG trial showed that the SGLT2 inhibitor, empagliflozin, significantly reduces the risk of cardiovascular morbidity and mortality, regulatory agencies including the Food and Drug Administration (FDA), the European Medicines Associations (EMA) and Health Canada have issued safety warnings for several adverse events. These include acute kidney injury (AKI), diabetic ketoacidosis (DKA), urinary tract infections (UTI), bone fractures and lower limb amputations, based primarily on case report data.[6–14]

With respect to AKI, there is conflicting information coming forward from clinical trials and case reports. Despite early indication of a protective effect from SGLT2 inhibitors,[15] the FDA published in a safety communication in June 2016 that 101 cases of AKI were reported among users of canagliflozin and dapagliflozin.[12] To date, no meta-analysis of AKI has been published. In May 2015 the FDA published a safety update indicating an increased risk of UTI and DKA. Among patients taking SGLT2 inhibitors, they identified 19 cases of life-threatening infections that originated as a UTI, and 73 cases of DKA. However, to date clinical trial evidence does not support these potential risks. Four published meta-analyses of randomized control trials (RCT) and found no increased risk of UTIs, except within a subgroup of dapagliflozin,[15–18] and one study found an increased risk with empagliflozin 25mg users.[18] One meta-analysis on the risk of DKA currently exists, and shows no increased risk.[19] In January 2016, the FDA issued an expanded warning regarding a potential increased risk for fracture with canagliflozin.[9] Two published meta-analyses.[20, 21] of SGLT2 inhibitors did not find an increased risk, nor did a pooled analysis of eight canagliflozin trials.[22] Finally, in May 2017, the FDA supported earlier speculation of increased risk of low limb amputation[11] with evidence gathered from re-analysis the CANVAS and CANVAS-R

1  
2 trials, demonstrating a two-fold increased risk.[23] No meta-analysis of RCTs currently exists  
3 with respect to amputation.  
4

5  
6 In light of recent guideline changes that promote earlier integration of the SGLT2  
7 inhibitors into therapy, clinicians and policy makers need to continue examining the potential  
8 risks to their patients. Our objective is to address the current knowledge gap surrounding the  
9 post-market safety of the SGLT2 inhibitors compared to active and non-active comparators in  
10 patients with type 2 diabetes. We have conducted a systematic review and meta-analysis of  
11 RCTs to estimate the risk of AKI, DKA, UTI, bone fracture and lower limb amputation.  
12  
13

## 14 15 16 **2.0 Methods and Analysis**

### 17 18 **2.1 Study Design**

19 This study has been designed in accordance with the PRISMA statement on  
20 systematic reviews and meta-analysis.[24] This protocol has been registered  
21 (CRD42016038715) with PROSPERO (International Prospective Register of Systematic  
22 Reviews).[25, 26]  
23  
24

### 25 26 27 **2.2 Patient Involvement**

28 Patients were not engaged in the development of this protocol.  
29

### 30 31 **2.3 Search Strategy**

32 A comprehensive search strategy was developed with an experienced health science  
33 librarian (MS). The search strategy for published studies was developed in the PubMed  
34 database, and comprised of keywords and MEDLINE controlled vocabulary or Medical  
35 Subject Headings (MeSH). A methodological search filter was applied to identify RCTs[27]  
36 and the search was limited to English language publications. This search strategy served as a  
37 template for additional search strategies tailored to other databases, including the Cochrane  
38 Library, EMBASE and International Pharmaceutical Abstracts. In addition, the reference lists  
39 of topical review articles, editorials, and included studies were hand-searched to identify other  
40 potentially relevant studies. A list of search terms is provided in Section 1 of the Online  
41 Appendix.  
42  
43  
44  
45

46 The search for unpublished studies and materials included ProQuest Dissertations &  
47 Theses Global (ProQuest), and clinical trial registries (ClinicalTrials.gov). Inclusion of  
48 unpublished data from the FDA has been shown to substantially impact the effect estimates  
49 of meta-analyses of drug trials.[28]  
50  
51

### 52 53 **2.4 Eligibility Criteria**

54 We included RCTs with a study population consisting of patients 18 years of age and  
55 older with a diagnosis of type 2 diabetes. Studies were required to have a formal definition of  
56  
57  
58

1  
2 type 2 diabetes based on established diagnostic criteria during the time of the study. No  
3 restriction was applied with respect to history of diabetes medication use. One of the RCT  
4 study groups was required to be one of the following SGLT2 inhibitors: canagliflozin,  
5 dapagliflozin, empagliflozin, ipragliflozin or any other investigational or approved SGLT2  
6 inhibitor during study period. Eligible comparators included second-generation sulfonylureas  
7 (glyburide, gliclazide, glimepiride, glipizide –first generation sulfonylureas excluded as they  
8 are currently not used in clinical practice), basal insulins (NPH, lente, glargine, detemir,  
9 degludec), dipeptidyl peptidase-4 Inhibitors (DPP-4I) (alogliptin, linagliptin, saxagliptin,  
10 sitagliptin), GLP-1 agonists (dulaglutide, exenatide, liraglutide), thiazolidinediones (TZDs)  
11 (pioglitazone, rosiglitazone), alpha-glucosidase Inhibitors (acarbose) or placebo/no treatment.  
12 All premixed or acute care insulin protocols were excluded. Any investigational agents other  
13 than SGLT-2 inhibitors were excluded.  
14  
15  
16  
17  
18

19 The outcomes of this study include the serious safety events as highlighted through the  
20 federal regulatory drug safety communications.[6–11] These include: AKI, DKA, UTI, bone  
21 fractures, and lower limb amputations.  
22  
23

24 Studies were eligible regardless of duration of follow-up, or publication date; however, non-  
25 English citations were excluded. Language restriction does not appear to bias estimates of  
26 therapeutic interventions.[29, 30]  
27  
28

## 29 **2.5 Study Selection and Data Extraction**

30  
31 We used DistillerSR, a systematic review software,[31] for screening and data  
32 extraction. Studies went through a two-level screening process. First, titles and abstracts  
33 were reviewed using the inclusion and exclusion criteria. Any studies that meet those criteria,  
34 or where a clear decision could not be made, moved to second level screening. At level two  
35 screening, full text articles were retrieved and the same criteria applied. Duplicate screening  
36 was carried out using the “liberal accelerated” method at both level one and level two, which  
37 was first applied by Khangura.[32] This method involves having a second reviewer only  
38 evaluate studies that were deemed not relevant by the lead reviewer. This reduces the overall  
39 number of papers that require duplicate screening without increasing the risk of having  
40 appropriate studies inadvertently excluded.  
41  
42  
43  
44

45 Information extracted included study characteristics (country, definitions of exposure(s)  
46 and controls), patient characteristics (sex, age, duration of diabetes) and outcome data (a  
47 complete list of extracted variables is available in Section 2 of the online appendix). Where  
48 the data conflicted between the published paper and other sources (e.g. ClinicalTrials.gov),  
49 the data from the published paper were used. Data were only supplemented from other  
50 sources when gaps in information existed. In cases where more than one publication reported  
51 data on the same study, preference was taken to studies that reported numbers of events  
52 (versus only relative risk or hazard ratio) and the most recent were used for data extraction.  
53 The exception to this rule was when there was a change to the intervention or comparator  
54  
55  
56  
57  
58  
59

1  
2 groups (e.g. drug, dose, etc.) for study extensions, then data from the original publication  
3 were used. Any disagreements were resolved through discussion and consensus. Where  
4 necessary, a third reviewer was consulted. All DistillerSR screening and extraction forms  
5 were created *a priori* and piloted using a small sample of eligible studies.  
6  
7

## 8 2.6 Risk of Bias Assessment

9

10 Each included study was critically appraised using the Cochrane Collaboration domain-  
11 based tool for assessing the risk of bias for RCTs.[33, 34] This tool captures six main  
12 sources of bias, including: randomization sequence, allocation concealment, blinding of  
13 participant and researcher, blinded outcome assessment, incomplete outcome data and  
14 selective reporting. A seventh category captures any other potential sources of bias. Bias was  
15 assessed at the study level. Low risk of bias was defined as an assessment on the risk of bias  
16 tool that included no more than two categories with “unclear risk”. Studies were defined as  
17 high risk if they had: three or more categories of “unclear risk”; one or more categories of  
18 “medium risk”; or one or more categories of “high risk”. Publication bias was examined using  
19 funnel plots.  
20  
21  
22  
23

## 24 2.7 Data Synthesis

25

26 We conducted a series of pair-wise random effects meta-analyses to estimate the  
27 pooled treatment effect using relative risks, using the restricted maximum likelihood  
28 method.[35] The primary analysis was split into two comparisons, with the first between  
29 SGLT2 inhibitors and placebo, and the second SGLT2 inhibitors and any active comparator.  
30 Between-study variance was estimated using the restricted maximum likelihood method. If  
31 there were zero events reported, a default value of 0.5 was added to all groups within that  
32 study. Statistical heterogeneity was evaluated using the I<sup>2</sup> statistic, with significant  
33 heterogeneity defined as an I<sup>2</sup> > 50%.[36] To explore treatment effect heterogeneity, we  
34 conducted numerous subgroup analyses according to individual SGLT2 inhibitors, risk of bias,  
35 and concurrent use of other diabetes medications. Concurrent/prior use was defined as any  
36 previous use of anti-diabetic agents that were used prior to enrollment or added as  
37 background therapy after enrollment. If patients could be therapy-naïve or have used other  
38 medications to meet enrollment criteria, then they were categorized as concurrent/prior use.  
39 Treatment-naïve was defined as patients that: have never had an anti-diabetic medication in  
40 the past, have not been on any other anti-diabetic medication in weeks leading up to  
41 enrolment, or, were able to go through a washout prior to enrolment. We also conducted  
42 sensitivity analyses to explore the impact of methodologic decisions within our analysis. First,  
43 we pooled studies that had at least one reported event. Second, we repeated our analyses  
44 using fixed-effects models. All analysis was conducted using R statistical software (version  
45 3.4.1). Technical appendix, statistical code, and dataset available from the corresponding  
46 author.  
47  
48  
49  
50  
51  
52  
53  
54  
55  
56  
57  
58  
59  
60

## 3.0 Results

### 3.1 Included Studies

A total of 2418 unique titles and abstracts were screened. Of these, 650 proceeded to full text screening. A total of 144 citations met our inclusion criteria, however 34 were excluded at the data extraction phase due to duplication of data, from the publication of extension studies or post-hoc analyses. A final total of 109 publications were included,[5, 23, 37–143] representing 112 randomized populations (Figure 1). Three publications reported on multiple unique populations. Most studies included one of the four marketed SGLT2 inhibitors, dapagliflozin (34 studies), canagliflozin (20 studies), empagliflozin (25 studies) and ipragliflozin (11 studies); while 21 studies included one of five non-marketed agents. With respect to comparators, 4 conducted within-class comparisons, 92 compared to placebo, 8 compared to metformin, 10 compared to an incretin agent, 5 compared to a sulfonylurea, and 3 compared to pioglitazone. A total of 9 studies included more than one unique comparator. One publication, reporting on the combined results of the CANVAS program[23] studies only, provided events as rates per 1000 person years. Data from this publication was only used for the amputation outcome assessment, data from an earlier publication on a sub-set of this population was used for other outcomes as actual event numbers were reported.[84] Section 3 of the Online Appendix outlines the characteristics of each of the included studies.

### 3.2 Primary Analysis

#### *Acute Kidney Injury*

Acute kidney injury was reported in 11 RCTs (8 placebo comparison, and 3 active comparison trials): meta-analysis was only possible with placebo-controlled trials. Overall SGLT2 inhibitors were found to have a protective effect (RR 0.59; 95% CI 0.39-0.89,  $I^2 = 0.0\%$ ), however this estimate is heavily weighted by one study using empagliflozin, the EMPA-REG trial (Figure 2).[5] Pooled estimate after removing the EMPA-REG trial was non-significant (RR 0.48; 95% CI 0.14-1.64;  $I^2 = 0.0\%$ ).

#### *Diabetic Ketoacidosis*

Diabetic ketoacidosis was reported in 26 RCTs (18 Placebo comparison, 8 active comparisons, and 1 within class comparison trial). Neither placebo (RR 0.66; 95% CI 0.30-1.45,  $I^2 = 0.0\%$ ) (Figure 3) nor incretin (RR 0.43; 95% CI 0.069-2.75;  $I^2 = 0.0\%$ ; 3 Studies) (Forest plot, online appendix Section 4) comparisons showed a significant difference in risk of DKA. Additional analysis using only placebo-controlled trials that had at least one event also yielded no significant difference (RR 0.73; 95% CI 0.25-2.16;  $I^2 = 0.0\%$ ; 7 studies) (Forest plot, online appendix Section 4).

#### *Urinary tract infections*

Urinary tract infection was the most frequently reported outcome examined (110 of 112



studies reported). When compared to placebo, SGLT2 inhibitors as a class did not demonstrate a significant increase risk (RR 1.02; 95% CI 0.95-1.09), however subgroup analysis of the individual agents did show a significantly increased risk of UTIs in users of dapagliflozin (RR 1.21; 1.02-1.43), but not empagliflozin, canagliflozin, ipragliflozin or non-marketed SGLT2 inhibitors (grouped) (Figure 4). When compared to active treatments, SGLT2 inhibitors grouped together did not demonstrate an increased risk of UTIs over metformin, sulfonylureas, incretins or glitizones (Figure 5), however when broken down by individual SGLT2 inhibitor, dapagliflozin showed an increased risk of UTI of active comparators grouped together (RR 1.42; 95% CI 1.07-1.87) (Forest plot, online appendix Section 4).

### *Bone Fracture*

Bone fracture was reported in 63 RCTs (47 placebo comparisons, 14 active comparison, and 2 within class comparisons). SGLT2 inhibitors were not found to have an increased risk of fractures over placebo (RR 0.87; 95% CI 0.69-1.09) (Figure 6), metformin (RR 0.69; 95% CI 0.19-2.51;  $I^2 = 0.0\%$ ; 6 studies), sulfonylureas (RR 1.15; 95% CI 0.66-2.00;  $I^2 = 0.0\%$ ; 3 studies) or incretins (RR 1.38; 95% CI 0.31-6.17;  $I^2 = 0.0\%$ ; 3 studies). A subgroup analysis of canagliflozin compared to placebo alone, the agent identified by the FDA as having an increased risk, was also non-significant (RR 1.02; 95% CI 0.63-1.65;  $I^2 = 0.0\%$ ; 12 studies) (Additional forest plots, online appendix Section 4).

### *Lower Limb Amputation*

Data was identified on amputation for three studies[23, 48, 109]. One case of amputation was found in the clinicaltrials.gov data for trial number NCT01422876 in a user of empagliflozin 25mg, no cases were reported for other treatment groups. The second study reported data from the CANVAS program, showed a rate of amputation among users of canagliflozin (100-300 mg) was 6.3 per 1000 patient-years, compared to 3.4 per 1000 patient-years for placebo, this difference was statistically significant ( $p < 0.001$ ). Actual number of events were not reported. The third study reported one case in each of the treatment groups, ertugliflozin (1/888) and glimepiride (1/437).

## **3.2 Sub-group and Sensitivity Analyses**

Several sub-group analyses were conducted to examine: the impact of prior and concurrent use of other anti-diabetic agents; the influence of risk of bias as per the quality appraisal; and the impact of the definition of UTI used as outlined in Table 1. Overall these additional analyses did not change the findings of the primary analysis. There was a decreased risk of AKI in the treatment-naïve group, and the low risk of bias group, but this was consistent with the main analysis and driven by the same one large study.[144] When the analyses were re-run using a fixed-effect models, the risk estimates remained the same or had slightly smaller confidence intervals. Forest plots for the fixed effects analysis are in Section 5 of the online appendix.



### 3.3 Risk of bias

Generally, studies were of good methodological quality, however numerous studies were deemed high risk of selective reporting after outcome data was retrieved from ClinicalTrials.gov that were not reported in the peer-reviewed publication (28%). Other potential sources of bias came from unclear reporting of methodological processes like randomization sequence (32%) or blinded outcome assessment (17%), while most sources of bias came from lack of blinding of the researchers and participants (13%) and of the outcome assessors (9%). Risk of bias assessment for individual studies are available in Section 6 of the online appendix. Funnel plots do not suggest of the presence of publication bias (see Section 7 of the Online Appendix).

### 4.0 Discussion

This study provides a comprehensive review of the RCT literature with respect to key safety outcomes identified through post-marketing surveillance systems and communicated to health professionals and the public by drug regulators. We pooled outcome data from over 100 RCTs (including unpublished data only available through ClinicalTrials.gov) to quantify the association between SGLT2 inhibitors and AKI, DKA, UTI, and bone fracture. We found that SGLT2 inhibitors as a class do not appear to increase the risk of DKA, UTI, and bone fracture, and may have a protective effect with respect to AKI, though this effect was heavily weighted by one large RCT. With respect to UTI, overall findings do not hold in subgroup analysis by individual drug, suggesting that increased risk of UTI is associated only with dapagliflozin.

Despite early indication of a protective effect from SGLT2 inhibitors on kidney function,[15] the FDA published in a safety communication in June 2016 that 101 cases of AKI were reported among users of canagliflozin and dapagliflozin.[12] SGLT2 inhibitors may provide a long-term protective effect on the kidneys via reduced trans-glomerular pressure, similar to the effects of agents that target the renin–angiotensin–aldosterone (RAAS) axis.[145] Szalat et al (2017) proposed three possible mechanisms that may explain the potential for an increased risk of AKI with SGLT2 inhibitors: 1) excessive diuresis leading to volume depletion, a particular concern for those who are hemodynamically unstable and volume-depleted; 2) a greater drop in trans-glomerular pressure due to the concomitant action of SGLT2 inhibition and RAAS blockade; and 3) renal medullary hypoxic injury, likely occurring in patients taking concomitant agents that impair medullary oxygenation (e.g. NSAIDs, radio-contrast dyes).[145] Additional potential mechanisms of renal injury include an increase in the urinary uric acid level leading to both crystal dependent and crystal independent tubular injury, and activation of aldose reductase resulting in fructose generation ultimately leading to increased oxidative stress, uric acid, cytokine release and inflammation.[146] This systematic review highlights a lack of reporting of AKI with only 11 of 111 randomized comparisons having published data on this outcome. Though an overall protective effect was found, this finding was driven by one large RCT that compared empagliflozin to placebo. Evidence to support or refute the potential risk of AKI with use of

1  
2 canagliflozin or dapagliflozin was insufficient. Case reports filed with the FDA suggest that this  
3 adverse outcome frequently occurs early in therapy (within one month of initiation) and  
4 therefore this lack of reporting should not be due to the duration of clinical trials. Recent  
5 observational data also supports clinical trial data on AKI. Nadkarni et al. (2017) reported on  
6 the incidence of AKI among two cohorts comparing patients with type 2 diabetes using  
7 SGLT2 inhibitors to non-users.[147] After an average follow-up time of 14 months, adjusted  
8 hazard ratios showed SGLT2 inhibitors to be protective in one cohort (aHR 0.4 [95% CI 0.2–  
9 0.7]; P= 0.004) and favoring SGLT2 inhibitors, though not statistically significant, in the  
10 second cohort (aHR 0.6 [95% CI 0.4–1.1]; P= 0.09). These findings were not driven by users  
11 of empagliflozin, rather 91.2% and 71.4% of SGLT2 inhibitor users in these cohorts were  
12 taking either canagliflozin or dapagliflozin respectively.  
13  
14  
15  
16  
17

18 Reports of euglycemic DKA among patients with type 2 diabetes is concerning, as a  
19 diagnosis can easily be missed. Though rare, the SGLT2 inhibitors are thought to increase  
20 the risk by two potential mechanisms: 1) they increase urinary glucose excretion which leads  
21 to a reduction in insulin secretion and stimulates free fatty acid production which are later  
22 converted to ketone bodies; and 2) they stimulate glucagon secretion which may lead to an  
23 overproduction of ketone bodies.[148] An accurate assessment of the potential increased risk  
24 of DKA among users of SGLT2 inhibitors was difficult with the data reported within RCTs.  
25 Baseline incidence rates of DKA in patients with type 2 diabetes was found to be 1.34 per  
26 1,000 person-years in a 20 year retrospective Danish cohort study, with declining incidence  
27 each year.[149] Therefore, most RCTs had insufficient sample size to detect any cases. Of  
28 the 16 RCTs that reported DKA, only 7 (representing 11,004 patients) had one or more cases.  
29 Our findings are consistent with published observational literature, which indicates no  
30 increased risk, however confidence intervals were wide. A case-control study using Truven  
31 MarketScan data (a large US claims database),[150] and a cross-sectional using the FDA  
32 Adverse Event Reporting System (FAERS) database[151] examining this issue have recently  
33 been published. Both studies used DPP-4 inhibitors as the active comparator given they have  
34 no known risk for DKA and are used in a similar fashion as second line therapy in type 2  
35 diabetes, and both showed significant increased risk with SGLT2 inhibitors (Case-Control: 7-  
36 fold increased risk among 140,352 patients; cross-sectional: HR 2.2; 95% CI 1.4-3.6, among  
37 416,670). In contrast, the Danish cohort study did not find an increased risk of DKA in  
38 individuals taking SGLT2 inhibitors compared to other diabetes therapies (HR 1.6; 95% CI  
39 0.6-3.5), although the upper bound of the 95% confidence interval does not rule out significant  
40 harm.[149] No meta-analyses assessing this outcome were found.  
41  
42  
43  
44  
45  
46  
47  
48  
49

50 Given the mechanism of action of the SGLT2 inhibitors, which work by inhibiting  
51 glucose reabsorption in the kidney leading to increase glucose excretion in the urine, an  
52 increased risk of UTI is plausible. In May 2015 the FDA reported in a safety update that 19  
53 cases of life-threatening kidney or blood infections that originated as a UTI had been  
54 identified in patients taking a SGLT2 inhibitor. However, a meta-analysis published in 2017,  
55 which is the largest to date, included 77 RCTs representing 50,820 patients and found no  
56  
57  
58  
59  
60

1  
2 increased risk of UTIs in SGLT2 inhibitor users (RR 1.05; 95% CI 0.98-1.12).[17] The  
3 previous meta-analysis limited inclusion to studies of at least 24 weeks and having a full text  
4 publication. Our study findings are consistent and add to the literature via the inclusion of 35  
5 more studies, resulting in a more precise effect estimate. Importantly, subgroup analysis of  
6 individual SGLT2 inhibitors suggest variation of UTI risk within class whereby dapagliflozin  
7 may increase UTI risk when compared to both placebo and active controls. A reasonable  
8 biologic mechanism for an increased risk of UTIs among dapagliflozin users is unclear,  
9 however some early pathophysiological studies suggest that the dose response relationship  
10 with urinary glucose excretion seems to plateau at the beginning of the normal recommended  
11 doses for most SGLT2 inhibitors[128, 138, 152–155], though continues through the normal  
12 dosing range for dapagliflozin[156].  
13  
14  
15  
16  
17

18 In January 2016, the FDA issued an expanded warning regarding a potential increased  
19 risk for fracture with canagliflozin.[9] A disruption in calcium-phosphate homeostasis is one  
20 potentially contributing mechanism.[20] SGLT2 inhibitors increase serum phosphate levels via  
21 increased tubular reabsorption of phosphate. Increased phosphate levels then stimulate  
22 parathyroid hormone release which may enhance bone resorption leading to an increased  
23 fracture risk in patients using SGLT2 inhibitors.[157] In an RCT conducted by Bode et al.  
24 (2015), additional investigation into the change in bone mineral density in canagliflozin versus  
25 placebo users was conducted.[158] Their results showed a decreased placebo-corrected  
26 bone mineral density in the canagliflozin users at 2 years of 0.9-1.2% at the hip, 0.3-0.7% at  
27 the lumbar spine, 0.5% at the femoral neck, and 0.4% at the distal forearm. To date, two  
28 meta-analyses have been published examining the risk of fracture when comparing SGLT2  
29 inhibitors to placebo[20, 21]. Ruanpeng et al (2017) included 20 RCTs, and Tang et al (2016)  
30 included 38 RCTs. Neither meta-analysis in pooled or subgroup analysis of individual SGLT2  
31 inhibitors demonstrated a significant increased risk of fracture. A pooled analysis of eight  
32 canagliflozin RCTs also found no increased risk.[22] The results of this current study support  
33 the existing literature, demonstrating risk neutrality, with the addition of new RCT literature (a  
34 total of 58 RCTs, 45 of which were placebo controlled).  
35  
36  
37  
38  
39  
40  
41

42 To date research evidence on the risk of amputations among users of SGLT2 inhibitors  
43 is limited to results from the combined CANVAS and CANVAS-R trials. Only two other studies  
44 reported amputations, with one event per trial. Further data is needed to establish the true risk  
45 as well as to identify if this may be a class effect or agent specific.  
46  
47  
48

#### 49 **4.1 Limitations**

50 Although we conducted a comprehensive systematic review of RCTs of SGLT2  
51 inhibitors, there are still limitations to be considered when interpreting our findings. First, our  
52 review focused on select adverse events and excluded any benefits. Though this narrows the  
53 focus and requires the consideration of additional literature to make clinical decisions on  
54 appropriate use of SGLT2 inhibitors, it also provides a succinct and in-depth assessment of  
55 the unexpected adverse effects that have been reported post-market. Secondly, several of  
56  
57  
58  
59

1  
2 the outcomes (e.g., AKI, DKA, limb amputations) we evaluated occur infrequently. This also  
3 resulted in these individual outcomes to be at a higher risk of selective reporting bias than the  
4 more common adverse effects. We did our best to account for this risk by supplementing  
5 unreported outcomes with data from [clinicaltrials.gov](http://clinicaltrials.gov), however it is possible the cases of  
6 these outcomes were not recorded or reported through either of these sources. Thirdly,  
7 certain outcomes may have been inadequately characterized within study reports. For  
8 example, while UTIs were commonly reported among RCTs included in this meta-analysis,  
9 data on complicated versus uncomplicated infections were not. The FDA highlighted 19 cases  
10 of life-threatening infections stemming from UTIs. It is possible that SGLT2 inhibitors play a  
11 role in the progression of UTI to more complicated clinical outcomes. Fourth, the limited  
12 duration of included RCTs (36% of studies were less than 24 weeks and 63% less than one  
13 year) precludes the estimation of long-term effects of SGLT2 inhibitors. This may be important  
14 in case of declining bone integrity. Finally, it was difficult to accurately assess the  
15 methodological quality of the included studies given the fact we were examining secondary  
16 and rarely reported outcomes. It has been noted that traditional quality appraisal forms are  
17 not always well suited to systematic reviews of adverse events. This is due to the fact that  
18 sometimes data adverse effects may be collected after allocation is known, or through self-  
19 assessment questionnaires.[159]  
20  
21  
22  
23  
24  
25  
26  
27

## 28 5.0 Conclusion

29  
30 Despite the growing body of evidence on the new SGLT2 inhibitors, there remains minimal  
31 evidence demonstrating the comparative safety with respect to the more serious and  
32 unexpected outcomes. Current evidence from RCTs does not suggest an increased risk of  
33 harm with SGLT2 inhibitors, as a class, over placebo or active comparators with respect to  
34 the AKI, DKA, UTI or fracture. There appears to be treatment effect heterogeneity for the risk  
35 of UTI among specific SGLT2 inhibitors. Larger sample sizes and more long-term evidence,  
36 including observational studies, is needed to refine our estimates of the risk of AKI, DKA,  
37 fracture and amputation among SGLT2 inhibitor users.  
38  
39  
40  
41  
42  
43

44 **Acknowledgements:** JRD holds a Fellowship from the Canadian Institutes of Health  
45 Research. JMG is supported by a New Investigator Award from the Canadian Institute of  
46 Health Research and a Clinician Scientist Award from the Canadian Diabetes Association.  
47  
48

49 **Funding Source:** This work was supported by the Newfoundland and Labrador Centre for  
50 Applied Health Research.  
51

52 **Conflicts of Interest:** None  
53  
54  
55  
56  
57  
58  
59  
60

1  
2 **Data Sharing Statement:** All data used in this systematic review and meta-analysis are  
3 available through previously published articles and/or through clinical trials.gov. Section 2 of  
4 the supplementary appendix includes a complete list of data extraction variables that were  
5 collected. Access to the data can be granted by contacting the corresponding author.  
6  
7  
8  
9  
10  
11  
12  
13  
14  
15  
16  
17  
18  
19  
20  
21  
22  
23  
24  
25  
26  
27  
28  
29  
30  
31  
32  
33  
34  
35  
36  
37  
38  
39  
40  
41  
42  
43  
44  
45  
46  
47  
48  
49  
50  
51  
52  
53  
54  
55  
56  
57  
58  
59  
60

For peer review only

**Author Statements:**

*Jennifer R. Donnan* led the review and was involved at every stage, including protocol development, search strategy design, screening, data extraction, quality appraisal, analysis and manuscript preparation.

*Catherine Grandy* was involved in screening, data extraction, quality appraisal and manuscript revisions and final approval.

*Eugene Chibrikov* was involved in data cleaning and analysis, manuscript revisions and final approval.

*Carlo A. Marra* was involved in project conception, protocol development and manuscript revisions and final approval.

*Kris Aubrey-Bassler* was involved in project conception, protocol development and manuscript revisions and final approval.

*Karissa Johnston* was involved in project conception, protocol development and manuscript revisions and final approval.

*Michelle Swab* was involved in search strategy design, literature search, and manuscript revisions and final approval.

*Jenna Hache* was involved in screening, data extraction, quality appraisal and manuscript revisions and final approval.

*Daniel Curnew* was involved in screening, data extraction, quality appraisal and manuscript revisions and final approval.

*Hai Nguyen* was involved in interpretation of study results, manuscript revisions, and final approval.

*John-Michael Gamble* supervised this research and was involved in protocol development, consensus on disagreements in data extraction, data analysis, interpretation of results, manuscript revisions and final approval.



## References

1. Canadian Diabetes Association (2016) 2016 Interim Update to the Guidelines: Update to the Pharmacologic Management of Type 2 Diabetes
2. American Diabetes Association (2016) 2016 American Diabetes Association (ADA) Diabetes Guidelines Summary Recommendations from NDEI 1 2016 American Diabetes Association (ADA) Diabetes Guidelines Summary Recommendations from NDEI
3. Marso SP, Daniels GH, Brown-Frandsen K, et al (2016) Liraglutide and Cardiovascular Outcomes in Type 2 Diabetes. *N Engl J Med* 375:311–322 . doi: 10.1056/NEJMoa1603827
4. Marso SP, Bain SC, Consoli A, et al (2016) Semaglutide and Cardiovascular Outcomes in Patients with Type 2 Diabetes. *N Engl J Med* 375:1834–1844 . doi: 10.1056/NEJMoa1607141
5. Zinman B, Wanner C, Lachin JM, et al (2015) Empagliflozin, Cardiovascular Outcomes, and Mortality in Type 2 Diabetes. *N Engl J Med* 373:2117–2128 . doi: 10.1056/NEJMoa1504720
6. Zinman B, Wanner C, Lachin JM, et al (2015) Empagliflozin, Cardiovascular Outcomes, and Mortality in Type 2 Diabetes. *N Engl J Med*. doi: 10.1056/NEJMoa1504720
7. Health Canada (2015) Summary Safety Review - Sodium Glucose Cotransporter 2 (SGLT2) Inhibitors INVOKANA (canagliflozin) and FORXIGA (dapagliflozin) - Evaluation of a Potential Risk of Acute Kidney Injury. <http://www.hc-sc.gc.ca/dhp-mps/medeff/reviews-examens/sglt2-eng.php>. Accessed 10 Dec 2015
8. Health Canada Forxiga, Invokana: Health Canada begins safety review of diabetes drugs known as SGLT2 inhibitors and risk of ketoacidosis. <http://healthycanadians.gc.ca/recall-alert-rappel-avis/hc-sc/2015/53892a-eng.php>. Accessed 10 Dec 2015
9. Center for Drug Evaluation and Research FDA Drug Safety Communication: FDA revises label of diabetes drug canagliflozin (Invokana, Invokamet) to include updates on bone fracture risk and new information on decreased bone mineral density. <http://www.fda.gov/Drugs/DrugSafety/ucm461449.htm>. Accessed 10 Dec 2015
10. Center for Drug Evaluation and Research FDA Drug Safety Communication: FDA revises labels of SGLT2 inhibitors for diabetes to include warnings about too much acid in the blood and serious urinary tract infections. <http://www.fda.gov/Drugs/DrugSafety/ucm475463.htm>. Accessed 10 Dec 2015
11. Research C for DE and Drug Safety and Availability - FDA Drug Safety Communication: FDA confirms increased risk of leg and foot amputations with the diabetes medicine canagliflozin (Invokana, Invokamet, Invokamet XR). <https://www.fda.gov/Drugs/DrugSafety/ucm557507.htm>. Accessed 20 Dec 2017

12. Research C for DE and Drug Safety and Availability - FDA Drug Safety Communication: FDA strengthens kidney warnings for diabetes medicines canagliflozin (Invokana, Invokamet) and dapagliflozin (Farxiga, Xigduo XR). <https://www.fda.gov/Drugs/DrugSafety/ucm505860.htm>. Accessed 12 Dec 2017
13. European Medicines Agency - News and Events - SGLT2 inhibitors: information on potential risk of toe amputation to be included in prescribing information. In: Eur. Med. Agency. [http://www.ema.europa.eu/ema/index.jsp?curl=pages/news\\_and\\_events/news/2017/02/news\\_detail\\_002699.jsp&mid=WC0b01ac058004d5c1](http://www.ema.europa.eu/ema/index.jsp?curl=pages/news_and_events/news/2017/02/news_detail_002699.jsp&mid=WC0b01ac058004d5c1). Accessed 6 Feb 2018
14. (2016) EMA confirms recommendations to minimise ketoacidosis risk with SGLT2 inhibitors for diabetes. In: Eur. Med. Agency. [http://www.ema.europa.eu/ema/index.jsp?curl=pages/medicines/human/referrals/SGLT2\\_inhibitors/human\\_referral\\_prac\\_000052.jsp&mid=WC0b01ac05805c516f](http://www.ema.europa.eu/ema/index.jsp?curl=pages/medicines/human/referrals/SGLT2_inhibitors/human_referral_prac_000052.jsp&mid=WC0b01ac05805c516f). Accessed 6 Feb 2018
15. Fioretto P, Zambon A, Rossato M, et al (2016) SGLT2 Inhibitors and the Diabetic Kidney. *Diabetes Care* 39 Suppl 2:S165-171 . doi: 10.2337/dcS15-3006
16. Li D, Wang T, Shen S, et al (2017) Urinary tract and genital infections in patients with type 2 diabetes treated with sodium-glucose co-transporter 2 inhibitors: A meta-analysis of randomized controlled trials. *Diabetes Obes Metab* 19:348–355 . doi: 10.1111/dom.12825
17. Liu J, Li L, Li S, et al (2017) Effects of SGLT2 inhibitors on UTIs and genital infections in type 2 diabetes mellitus: a systematic review and meta-analysis. *Sci Rep* 7:2824 . doi: 10.1038/s41598-017-02733-w
18. Zaccardi F, Webb DR, Htike ZZ, et al (2016) Efficacy and safety of sodium-glucose co-transporter-2 inhibitors in type 2 diabetes mellitus: systematic review and network meta-analysis. *Diabetes Obes Metab* 18:783–794 . doi: 10.1111/dom.12670
19. Saad M, Mahmoud AN, Elgendy IY, et al (2017) Cardiovascular outcomes with sodium-glucose cotransporter-2 inhibitors in patients with type II diabetes mellitus: A meta-analysis of placebo-controlled randomized trials. *Int J Cardiol* 228:352–358 . doi: 10.1016/j.ijcard.2016.11.181
20. Ruanpeng D, Ungprasert P, Sangtian J, Harindhanavudhi T (2017) Sodium-glucose cotransporter 2 (SGLT2) inhibitors and fracture risk in patients with type 2 diabetes mellitus: A meta-analysis. *Diabetes Metab Res Rev* 33: . doi: 10.1002/dmrr.2903
21. Tang HL, Li DD, Zhang JJ, et al (2016) Lack of evidence for a harmful effect of sodium-glucose co-transporter 2 (SGLT2) inhibitors on fracture risk among type 2 diabetes patients: a network and cumulative meta-analysis of randomized controlled trials. *Diabetes Obes Metab* 18:1199–1206 . doi: 10.1111/dom.12742
22. Watts NB, Bilezikian JP, Usiskin K, et al (2016) Effects of Canagliflozin on Fracture Risk in Patients With Type 2 Diabetes Mellitus. *J Clin Endocrinol Metab* 101:157–166 . doi: 10.1210/jc.2015-3167



- 1  
2 23. Neal B, Perkovic V, Mahaffey KW, et al (2017) Canagliflozin and Cardiovascular and  
3 Renal Events in Type 2 Diabetes. *N Engl J Med* 377:644–657 . doi:  
4 10.1056/NEJMoa1611925  
5
- 6 24. Moher D, Liberati A, Tetzlaff J, Altman DG (2009) Preferred reporting items for  
7 systematic reviews and meta-analyses: the PRISMA statement. *Ann Intern Med*  
8 151:264–269  
9
- 10 25. Gamble J-M, Conway A, Myers KJ, et al (2013) Incretin based drugs for type 2 diabetes:  
11 an overview of systematic reviews. PROSPERO CRD42013005149  
12  
13
- 14 26. Price HI, Agnew M, Gamble J (2014) Comparative cardiovascular morbidity and mortality  
15 in patients taking different insulin regimens for type 2 diabetes: a systematic review  
16
- 17 27. (2011) *Cochrane Handbook for Systematic Reviews of Interventions Version 5.1.0*  
18
- 19 28. Hart B, Lundh A, Bero L (2012) Effect of reporting bias on meta-analyses of drug trials:  
20 reanalysis of meta-analyses. *BMJ* 344:d7202–d7202 . doi: 10.1136/bmj.d7202  
21  
22
- 23 29. Moher D, Klassen T, Schulz K, et al (2000) What contributions do languages other than  
24 English make on the results of meta-analyses? *J Clin Epidemiol* 53:964–972  
25
- 26 30. Morrison A, Polisena J, Husereau D, et al (2012) The effect of English-language  
27 restriction on systematic review-based meta-analyses: a systematic review of empirical  
28 studies. *Int J Technol Assess Health Care* 28:138–144 . doi:  
29 10.1017/S0266462312000086  
30
- 31 31. DistillerSR. Evidence Partners, Ottawa, Canada  
32
- 33 32. Khangura S, Konnyu K, Cushman R, et al (2012) Evidence summaries: the evolution of a  
34 rapid review approach. *Syst Rev* 1:10 . doi: 10.1186/2046-4053-1-10  
35  
36
- 37 33. Higgins JPT, Altman DG, Gøtzsche PC, et al (2011) The Cochrane Collaboration's tool  
38 for assessing risk of bias in randomised trials. *BMJ* 343:d5928  
39
- 40 34. Sterne J, Higgins J, Reeves B, on behalf of the development group for ACROBAT-NRSI.  
41 (2014) A Cochrane Risk of Bias Assessment Tool: for Non-Randomized Studies of  
42 Interventions (ACROBAT-NRSI), Version 1.0.0.  
43  
44
- 45 35. Veroniki AA, Jackson D, Viechtbauer W, et al (2016) Methods to estimate the between-  
46 study variance and its uncertainty in meta-analysis. *Res Synth Methods* 7:55–79 . doi:  
47 10.1002/jrsm.1164  
48
- 49 36. Higgins JPT, Thompson SG, Deeks JJ, Altman DG (2003) Measuring inconsistency in  
50 meta-analyses. *BMJ* 327:557–560  
51  
52
- 53 37. Ikeda S, Takano Y, Cynshi O, et al (2015) A novel and selective sodium-glucose  
54 cotransporter-2 inhibitor, tofogliflozin, improves glycaemic control and lowers body  
55 weight in patients with type 2 diabetes mellitus. *Diabetes Obes Metab* 17:984–993  
56  
57  
58  
59

- 1  
2 38. Kashiwagi A, Takahashi H, Ishikawa H, et al (2015) A randomized, double-blind,  
3 placebo-controlled study on long-term efficacy and safety of ipragliflozin treatment in  
4 patients with type 2 diabetes mellitus and renal impairment: results of the Long-Term  
5 ASP1941 Safety Evaluation in Patients with Type 2 Diabetes with Renal Impairment  
6 (LANTERN) study. *Diabetes Obes Metab* 17:152–160  
7
- 8  
9 39. Wilding JPH, Norwood P, T'joen C, et al (2009) A Study of Dapagliflozin in Patients With  
10 Type 2 Diabetes Receiving High Doses of Insulin Plus Insulin Sensitizers: Applicability  
11 of a novel insulin-independent treatment. *Diabetes Care* 32:1656–1662 . doi:  
12 10.2337/dc09-0517  
13
- 14 40. Fonseca VA, Ferrannini E, Wilding JP, et al (2013) Active- and placebo-controlled dose-  
15 finding study to assess the efficacy, safety, and tolerability of multiple doses of  
16 ipragliflozin in patients with type 2 diabetes mellitus. *J Diabetes Complications* 27:268–  
17 273 . doi: 10.1016/j.jdiacomp.2012.11.005  
18
- 19  
20 41. An Efficacy, Safety, and Tolerability Study for TA-7284 in Patients With Type 2 Diabetes  
21 - Full Text View - ClinicalTrials.gov. <https://clinicaltrials.gov/ct2/show/NCT01022112>.  
22 Accessed 15 Dec 2017  
23
- 24 42. Weber MA, Mansfield TA, Cain VA, et al (2016) Blood pressure and glycaemic effects of  
25 dapagliflozin versus placebo in patients with type 2 diabetes on combination  
26 antihypertensive therapy: a randomised, double-blind, placebo-controlled, phase 3  
27 study. *Lancet Diabetes Endocrinol* 4:211–220  
28
- 29  
30 43. Amin NB, Wang X, Mitchell JR, et al (2015) Blood pressure-lowering effect of the sodium  
31 glucose co-transporter-2 inhibitor ertugliflozin, assessed via ambulatory blood pressure  
32 monitoring in patients with type 2 diabetes and hypertension. *Diabetes Obes Metab*  
33 17:805–808  
34
- 35  
36 44. Schernthaner G, Gross JL, Rosenstock J, et al (2013) Canagliflozin Compared With  
37 Sitagliptin for Patients With Type 2 Diabetes Who Do Not Have Adequate Glycemic  
38 Control With Metformin Plus Sulfonylurea: A 52-week randomized trial. *Diabetes Care*  
39 36:2508–2515 . doi: 10.2337/dc12-2491  
40
- 41 45. Ji L, Han P, Liu Y, et al (2015) Canagliflozin in Asian patients with type 2 diabetes on  
42 metformin alone or metformin in combination with sulphonylurea. *Diabetes Obes Metab*  
43 17:23–31  
44
- 45  
46 46. Leiter LA, Yoon K-H, Arias P, et al (2015) Canagliflozin Provides Durable Glycemic  
47 Improvements and Body Weight Reduction Over 104 Weeks Versus Glimepiride in  
48 Patients With Type 2 Diabetes on Metformin: A Randomized, Double-Blind, Phase 3  
49 Study. *Diabetes Care* 38:355–364 . doi: 10.2337/dc13-2762  
50
- 51 47. Mudaliar S, Henry RR, Boden G, et al (2014) Changes in Insulin Sensitivity and Insulin  
52 Secretion with the Sodium Glucose Cotransporter 2 Inhibitor Dapagliflozin. *Diabetes*  
53 *Technol Ther* 16:137–144 . doi: 10.1089/dia.2013.0167  
54  
55  
56  
57  
58  
59  
60

- 1  
2 48. DeFronzo RA, Lewin A, Patel S, et al (2015) Combination of Empagliflozin and  
3 Linagliptin as Second-Line Therapy in Subjects With Type 2 Diabetes Inadequately  
4 Controlled on Metformin. *Diabetes Care* 38:384–393 . doi: 10.2337/dc14-2364  
5
- 6 49. Ekholm E, Hansen L, Johnsson E, et al (2017) COMBINED TREATMENT WITH  
7 SAXAGLIPTIN PLUS DAPAGLIFLOZIN REDUCES INSULIN LEVELS BY INCREASED  
8 INSULIN CLEARANCE AND IMPROVES  $\beta$ -CELL FUNCTION. *Endocr Pract Off J Am*  
9 *Coll Endocrinol Am Assoc Clin Endocrinol* 23:258–265 . doi: 10.4158/EP161323.OR  
11
- 12 50. Ridderstråle M, Andersen KR, Zeller C, et al (2014) Comparison of empagliflozin and  
13 glimepiride as add-on to metformin in patients with type 2 diabetes: a 104-week  
14 randomised, active-controlled, double-blind, phase 3 trial. *Lancet Diabetes Endocrinol*  
15 2:691–700 . doi: 10.1016/S2213-8587(14)70120-2  
16
- 17 51. Ito D, Shimizu S, Inoue K, et al (2017) Comparison of Ipragliflozin and Pioglitazone  
18 Effects on Nonalcoholic Fatty Liver Disease in Patients With Type 2 Diabetes: A  
19 Randomized, 24-Week, Open-Label, Active-Controlled Trial. *Diabetes Care* 40:1364–  
20 1372 . doi: 10.2337/dc17-0518  
22
- 23 52. Yang W, Han P, Liu B, et al (2014) Dapagliflozin (DAPA) reduces HbA1c in asian  
24 patients with T2DM after metformin (MET) failure. *Diabetes* 63:A279  
25
- 26 53. Lambers Heerspink HJ, De Zeeuw D, Wie L, et al (2013) Dapagliflozin a glucose-  
27 regulating drug with diuretic properties in subjects with type 2 diabetes. *Diabetes Obes*  
28 *Metab* 15:853–862  
29
- 30 54. Bailey CJ, Gross JL, Hennicken D, et al (2013) Dapagliflozin add-on to metformin in type  
31 2 diabetes inadequately controlled with metformin: a randomized, double-blind,  
32 placebo-controlled 102-week trial. *BMC Med* 11:43 . doi: 10.1186/1741-7015-11-43  
34
- 35 55. Strojek K, Yoon K-H, Hrubá V, et al (2014) Dapagliflozin Added to Glimepiride in Patients  
36 with Type 2 Diabetes Mellitus Sustains Glycemic Control and Weight Loss Over 48  
37 Weeks: A Randomized, Double-Blind, Parallel-Group, Placebo-Controlled Trial.  
38 *Diabetes Ther* 5:267–283 . doi: 10.1007/s13300-014-0072-0  
39
- 40 56. Leiter LA, Cefalu WT, de Bruin TWA, et al (2014) Dapagliflozin Added to Usual Care in  
41 Individuals with Type 2 Diabetes Mellitus with Preexisting Cardiovascular Disease: A  
42 24-Week, Multicenter, Randomized, Double-Blind, Placebo-Controlled Study with a 28-  
43 Week Extension. *J Am Geriatr Soc* 62:1252–1262 . doi: 10.1111/jgs.12881  
45
- 46 57. Yang W, Ma J, Li Y, et al (2017) Dapagliflozin as add-on therapy in Asian patients with  
47 type 2 diabetes inadequately controlled on insulin with or without oral antihyperglycemic  
48 drugs: A randomized controlled trial. *J Diabetes*. doi: 10.1111/1753-0407.12634  
49
- 50 58. Ji L, Ma J, Li H, et al (2014) Dapagliflozin as Monotherapy in Drug-Naive Asian Patients  
51 With Type 2 Diabetes Mellitus: A Randomized, Blinded, Prospective Phase III Study.  
52 *Clin Ther* 36:84-100.e9 . doi: 10.1016/j.clinthera.2013.11.002  
54  
55  
56  
57  
58  
59

- 1  
2 59. Wilding JPH, Woo V, Rohwedder K, et al (2014) Dapagliflozin in patients with type 2  
3 diabetes receiving high doses of insulin: efficacy and safety over 2 years. *Diabetes*  
4 *Obes Metab* 16:124–136  
5
- 6 60. Bolinder J, Ljunggren Ö, Johansson L, et al (2014) Dapagliflozin maintains glycaemic  
7 control while reducing weight and body fat mass over 2 years in patients with type 2  
8 diabetes mellitus inadequately controlled on metformin. *Diabetes Obes Metab* 16:159–  
9 169  
10
- 11 61. Bailey CJ, Iqbal N, T'joen C, List JF (2012) Dapagliflozin monotherapy in drug-naïve  
12 patients with diabetes: a randomized-controlled trial of low-dose range. *Diabetes Obes*  
13 *Metab* 14:951–959  
14  
15
- 16 62. Ferrannini E, Ramos SJ, Salsali A, et al (2010) Dapagliflozin Monotherapy in Type 2  
17 Diabetic Patients With Inadequate Glycemic Control by Diet and Exercise: A  
18 randomized, double-blind, placebo-controlled, phase 3 trial. *Diabetes Care* 33:2217–  
19 2224 . doi: 10.2337/dc10-0612  
20
- 21 63. Henry RR, Murray AV, Marmolejo MH, et al (2012) Dapagliflozin, metformin XR, or both:  
22 initial pharmacotherapy for type 2 diabetes, a randomised controlled trial: T2DM:  
23 dapagliflozin, metformin XR, or both. *Int J Clin Pract* 66:446–456 . doi: 10.1111/j.1742-  
24 1241.2012.02911.x  
25  
26
- 27 64. Cefalu WT, Leiter LA, de Bruin TWA, et al (2015) Dapagliflozin's Effects on Glycemia  
28 and Cardiovascular Risk Factors in High-Risk Patients With Type 2 Diabetes: A 24-  
29 Week, Multicenter, Randomized, Double-Blind, Placebo-Controlled Study With a 28-  
30 Week Extension. *Diabetes Care* 38:1218–1227 . doi: 10.2337/dc14-0315  
31  
32
- 33 65. Seino Y, Sasaki T, Fukatsu A, et al (2014) Dose-finding study of luseogliflozin in  
34 Japanese patients with type 2 diabetes mellitus: a 12-week, randomized, double-blind,  
35 placebo-controlled, phase II study. *Curr Med Res Opin* 30:1231–1244 . doi:  
36 10.1185/03007995.2014.909390  
37  
38
- 39 66. Rosenstock J, Aggarwal N, Polidori D, et al (2012) Dose-Ranging Effects of  
40 Canagliflozin, a Sodium-Glucose Cotransporter 2 Inhibitor, as Add-On to Metformin in  
41 Subjects With Type 2 Diabetes. *Diabetes Care* 35:1232–1238 . doi: 10.2337/dc11-1926  
42
- 43 67. Amin NB, Wang X, Jain SM, et al (2015) Dose-ranging efficacy and safety study of  
44 ertugliflozin, a sodium-glucose co-transporter 2 inhibitor, in patients with type 2 diabetes  
45 on a background of metformin. *Diabetes Obes Metab* 17:591–598  
46  
47
- 48 68. Rosenstock J, Hansen L, Zee P, et al (2015) Dual Add-on Therapy in Type 2 Diabetes  
49 Poorly Controlled With Metformin Monotherapy: A Randomized Double-Blind Trial of  
50 Saxagliptin Plus Dapagliflozin Addition Versus Single Addition of Saxagliptin or  
51 Dapagliflozin to Metformin. *Diabetes Care* 38:376–383 . doi: 10.2337/dc14-1142  
52
- 53 69. Matthaei S, Bowering K, Rohwedder K, et al (2015) Durability and tolerability of  
54 dapagliflozin over 52 weeks as add-on to metformin and sulphonylurea in type 2  
55 diabetes. *Diabetes Obes Metab* 17:1075–1084  
56  
57  
58  
59  
60

- 1  
2  
3  
4  
5  
6  
7  
8  
9  
10  
11  
12  
13  
14  
15  
16  
17  
18  
19  
20  
21  
22  
23  
24  
25  
26  
27  
28  
29  
30  
31  
32  
33  
34  
35  
36  
37  
38  
39  
40  
41  
42  
43  
44  
45  
46  
47  
48  
49  
50  
51  
52  
53  
54  
55  
56  
57  
58  
59  
60
70. Nishimura R, Tanaka Y, Koiwai K, et al (2015) Effect of empagliflozin monotherapy on postprandial glucose and 24-hour glucose variability in Japanese patients with type 2 diabetes mellitus: a randomized, double-blind, placebo-controlled, 4-week study. *Cardiovasc Diabetol* 14:11 . doi: 10.1186/s12933-014-0169-9
  71. Rosenstock J, Frias J, Páll D, et al (2018) Effect of ertugliflozin on glucose control, body weight, blood pressure and bone density in type 2 diabetes mellitus inadequately controlled on metformin monotherapy (VERTIS MET). *Diabetes Obes Metab* 20:520–529 . doi: 10.1111/dom.13103
  72. Henry R, Strange P, Zhou P, et al (2016) Effects of dapagliflozin (DAPA), a sodium glucose cotransporter 2 inhibitor, on 24-hour glycemic control in patients with type 2 diabetes (T2D) Henry, R. R., Strange, P., Zhou, R., Zhuplatov, S. B., Mansfield, T., Klein, D. and Katz, A. *Diabetes* 65:A311
  73. Weber MA, Mansfield TA, Alessi F, et al (2016) Effects of dapagliflozin on blood pressure in hypertensive diabetic patients on renin–angiotensin system blockade. *Blood Press* 25:93–103 . doi: 10.3109/08037051.2015.1116258
  74. Rosenstock J, Vico M, Wei L, et al (2012) Effects of Dapagliflozin, an SGLT2 Inhibitor, on HbA1c, Body Weight, and Hypoglycemia Risk in Patients With Type 2 Diabetes Inadequately Controlled on Pioglitazone Monotherapy. *Diabetes Care* 35:1473–1478 . doi: 10.2337/dc11-1693
  75. Inagaki N, Kondo K, Yoshinari T, Kuki H (2015) Efficacy and safety of canagliflozin alone or as add-on to other oral antihyperglycemic drugs in Japanese patients with type 2 diabetes: A 52-week open-label study. *J Diabetes Investig* 6:210–218 . doi: 10.1111/jdi.12266
  76. Kadowaki T, Inagaki N, Kondo K, et al (2017) Efficacy and safety of canagliflozin as add-on therapy to teneligliptin in Japanese patients with type 2 diabetes mellitus: Results of a 24-week, randomized, double-blind, placebo-controlled trial: KADOWAKI et al. *Diabetes Obes Metab* 19:874–882 . doi: 10.1111/dom.12898
  77. Lavallo-González FJ, Januszewicz A, Davidson J, et al (2013) Efficacy and safety of canagliflozin compared with placebo and sitagliptin in patients with type 2 diabetes on background metformin monotherapy: a randomised trial. *Diabetologia* 56:2582–2592 . doi: 10.1007/s00125-013-3039-1
  78. Inagaki N, Harashima S, Maruyama N, et al (2016) Efficacy and safety of canagliflozin in combination with insulin: a double-blind, randomized, placebo-controlled study in Japanese patients with type 2 diabetes mellitus. *Cardiovasc Diabetol* 15: . doi: 10.1186/s12933-016-0407-4
  79. Inagaki N, Kondo K, Yoshinari T, et al (2013) Efficacy and safety of canagliflozin in Japanese patients with type 2 diabetes: a randomized, double-blind, placebo-controlled, 12-week study. *Diabetes Obes Metab* 15:1136–1145
  80. Wilding JPH, Charpentier G, Hollander P, et al (2013) Efficacy and safety of canagliflozin in patients with type 2 diabetes mellitus inadequately controlled with metformin and



1  
2  
3  
4  
5  
6  
7  
8  
9  
10  
11  
12  
13  
14  
15  
16  
17  
18  
19  
20  
21  
22  
23  
24  
25  
26  
27  
28  
29  
30  
31  
32  
33  
34  
35  
36  
37  
38  
39  
40  
41  
42  
43  
44  
45  
46  
47  
48  
49  
50  
51  
52  
53  
54  
55  
56  
57  
58  
59  
60

sulphonylurea: a randomised trial. *Int J Clin Pract* 67:1267–1282 . doi: 10.1111/ijcp.12322

81. Inagaki N, Kondo K, Yoshinari T, et al (2014) Efficacy and safety of canagliflozin monotherapy in Japanese patients with type 2 diabetes inadequately controlled with diet and exercise: a 24-week, randomized, double-blind, placebo-controlled, Phase III study. *Expert Opin Pharmacother* 15:1501–1515 . doi: 10.1517/14656566.2014.935764
82. Stenlöf K, Cefalu WT, Kim K-A, et al (2013) Efficacy and safety of canagliflozin monotherapy in subjects with type 2 diabetes mellitus inadequately controlled with diet and exercise. *Diabetes Obes Metab* 15:372–382
83. Yale J-F, Bakris G, Cariou B, et al (2014) Efficacy and safety of canagliflozin over 52 weeks in patients with type 2 diabetes mellitus and chronic kidney disease. *Diabetes Obes Metab* 16:1016–1027
84. Neal B, Perkovic V, de Zeeuw D, et al (2015) Efficacy and Safety of Canagliflozin, an Inhibitor of Sodium–Glucose Cotransporter 2, When Used in Conjunction With Insulin Therapy in Patients With Type 2 Diabetes. *Diabetes Care* 38:403–411 . doi: 10.2337/dc14-1237
85. Kaku K, Inoue S, Matsuoka O, et al (2013) Efficacy and safety of dapagliflozin as a monotherapy for type 2 diabetes mellitus in Japanese patients with inadequate glycaemic control: a phase II multicentre, randomized, double-blind, placebo-controlled trial. *Diabetes Obes Metab* 15:432–440
86. Araki E, Onishi Y, Asano M, et al (2016) Efficacy and safety of dapagliflozin in addition to insulin therapy in Japanese patients with type 2 diabetes: Results of the interim analysis of 16-week double-blind treatment period. *J Diabetes Investig* 7:555–564 . doi: 10.1111/jdi.12453
87. Kaku K, Kiyosue A, Inoue S, et al (2014) Efficacy and safety of dapagliflozin monotherapy in Japanese patients with type 2 diabetes inadequately controlled by diet and exercise. *Diabetes Obes Metab* 16:1102–1110
88. Barnett AH, Mithal A, Manassie J, et al (2014) Efficacy and safety of empagliflozin added to existing antidiabetes treatment in patients with type 2 diabetes and chronic kidney disease: a randomised, double-blind, placebo-controlled trial. *Lancet Diabetes Endocrinol* 2:369–384 . doi: 10.1016/S2213-8587(13)70208-0
89. Kadowaki T, Haneda M, Inagaki N, et al (2015) Efficacy and Safety of Empagliflozin Monotherapy for 52 Weeks in Japanese Patients with Type 2 Diabetes: A Randomized, Double-Blind, Parallel-Group Study. *Adv Ther* 32:306–318 . doi: 10.1007/s12325-015-0198-0
90. Ross S, Thamer C, Cescutti J, et al (2015) Efficacy and safety of empagliflozin twice daily versus once daily in patients with type 2 diabetes inadequately controlled on metformin: a 16-week, randomized, placebo-controlled trial. *Diabetes Obes Metab* 17:699–702

- 1  
2 91. Ishihara H, Yamaguchi S, Nakao I, et al (2016) Efficacy and safety of ipragliflozin as add-  
3 on therapy to insulin in Japanese patients with type 2 diabetes mellitus (IOLITE): a  
4 multi-centre, randomized, placebo-controlled, double-blind study. *Diabetes Obes Metab*  
5 18:1207–1216 . doi: 10.1111/dom.12745  
6
- 7  
8 92. Kashiwagi A, Akiyama N, Shiga T, et al (2015) Efficacy and safety of ipragliflozin as an  
9 add-on to a sulfonylurea in Japanese patients with inadequately controlled type 2  
10 diabetes: results of the randomized, placebo-controlled, double-blind, phase III EMIT  
11 study. *Diabetol Int* 6:125–138 . doi: 10.1007/s13340-014-0184-9  
12
- 13  
14 93. Wilding JPH, Ferrannini E, Fonseca VA, et al (2013) Efficacy and safety of ipragliflozin in  
15 patients with type 2 diabetes inadequately controlled on metformin: a dose-finding  
16 study. *Diabetes Obes Metab* 15:403–409  
17
- 18  
19 94. Seino Y, Sasaki T, Fukatsu A, et al (2018) Efficacy and safety of luseogliflozin added to  
20 insulin therapy in Japanese patients with type 2 diabetes: a multicenter, 52-week,  
21 clinical study with a 16-week, double-blind period and a 36-week, open-label period.  
22 *Curr Med Res Opin* 34:981–994 . doi: 10.1080/03007995.2018.1441816  
23
- 24  
25 95. Seino Y, Sasaki T, Fukatsu A, et al (2014) Efficacy and safety of luseogliflozin as  
26 monotherapy in Japanese patients with type 2 diabetes mellitus: a randomized, double-  
27 blind, placebo-controlled, phase 3 study. *Curr Med Res Opin* 30:1245–1255 . doi:  
28 10.1185/03007995.2014.912983  
29
- 30  
31 96. Seino Y, Sasaki T, Fukatsu A, et al (2014) Efficacy and safety of luseogliflozin  
32 monotherapy in Japanese patients with type 2 diabetes mellitus: a 12-week,  
33 randomized, placebo-controlled, phase II study. *Curr Med Res Opin* 30:1219–1230 .  
34 doi: 10.1185/03007995.2014.901943  
35
- 36  
37 97. Kaku K, Watada H, Iwamoto Y, et al (2014) Efficacy and safety of monotherapy with the  
38 novel sodium/glucose cotransporter-2 inhibitor tofogliflozin in Japanese patients with  
39 type 2 diabetes mellitus: a combined Phase 2 and 3 randomized, placebo-controlled,  
40 double-blind, parallel-group comparative study. *Cardiovasc Diabetol* 13:65  
41
- 42  
43 98. Dagogo-Jack S, Liu J, Eldor R, et al (2017) Efficacy and safety of the addition of  
44 ertugliflozin in patients with type 2 diabetes mellitus inadequately controlled with  
45 metformin and sitagliptin: The VERTIS SITA2 placebo-controlled randomized study.  
46 *Diabetes Obes Metab*. doi: 10.1111/dom.13116  
47
- 48  
49 99. Rodbard HW, Seufert J, Aggarwal N, et al (2016) Efficacy and safety of titrated  
50 canagliflozin in patients with type 2 diabetes mellitus inadequately controlled on  
51 metformin and sitagliptin. *Diabetes Obes Metab* 18:812–819  
52
- 53  
54 100. Terauchi Y, Tamura M, Senda M, et al (2017) Efficacy and safety of tofogliflozin in  
55 Japanese patients with type 2 diabetes mellitus with inadequate glycaemic control on  
56 insulin therapy (J-STEP/INS): Results of a 16-week randomized, double-blind, placebo-  
57 controlled multicentre trial. *Diabetes Obes Metab* 19:1397–1407 . doi:  
58 10.1111/dom.12957  
59  
60

101. Qiu R, Capuano G, Meininger G (2014) Efficacy and safety of twice-daily treatment with canagliflozin, a sodium glucose co-transporter 2 inhibitor, added on to metformin monotherapy in patients with type 2 diabetes mellitus. *J Clin Transl Endocrinol* 1:54–60 . doi: 10.1016/j.jcte.2014.04.001
102. Lu C-H, Min KW, Chuang L-M, et al (2016) Efficacy, safety, and tolerability of ipragliflozin in Asian patients with type 2 diabetes mellitus and inadequate glycemic control with metformin: Results of a phase 3 randomized, placebo-controlled, double-blind, multicenter trial. *J Diabetes Investig* 7:366–373 . doi: 10.1111/jdi.12422
103. Maldonado-Lutomirsky M, Søfteland E, Meier J, et al (2016) Empagliflozin (EMPA) as add-on to linagliptin (LINA) and metformin in patients with type 2 diabetes (T2DM): A 24-week randomised, double-blind, parallel-group trial. *Diabetologia* 59:S93
104. Søfteland E, Meier JJ, Vangen B, et al (2017) Empagliflozin as Add-on Therapy in Patients With Type 2 Diabetes Inadequately Controlled With Linagliptin and Metformin: A 24-Week Randomized, Double-Blind, Parallel-Group Trial. *Diabetes Care* 40:201–209 . doi: 10.2337/dc16-1347
105. Kovacs CS, Seshiah V, Merker L, et al (2015) Empagliflozin as Add-on Therapy to Pioglitazone With or Without Metformin in Patients With Type 2 Diabetes Mellitus. *Clin Ther* 37:1773-1788.e1 . doi: 10.1016/j.clinthera.2015.05.511
106. Merker L, Häring H-U, Christiansen AV, et al (2015) Empagliflozin as add-on to metformin in people with Type 2 diabetes. *Diabet Med* 32:1555–1567 . doi: 10.1111/dme.12814
107. Haering H-U, Merker L, Christiansen AV, et al (2015) Empagliflozin as add-on to metformin plus sulphonylurea in patients with type 2 diabetes. *Diabetes Res Clin Pract* 110:82–90 . doi: 10.1016/j.diabres.2015.05.044
108. Tikkanen I, Narko K, Zeller C, et al (2015) Empagliflozin Reduces Blood Pressure in Patients With Type 2 Diabetes and Hypertension. *Diabetes Care* 38:420–428 . doi: 10.2337/dc14-1096
109. Hollander P, Liu J, Hill J, et al (2018) Ertugliflozin Compared with Glimepiride in Patients with Type 2 Diabetes Mellitus Inadequately Controlled on Metformin: The VERTIS SU Randomized Study. *Diabetes Ther Res Treat Educ Diabetes Relat Disord* 9:193–207 . doi: 10.1007/s13300-017-0354-4
110. Grunberger G, Camp S, Johnson J, et al (2018) Ertugliflozin in Patients with Stage 3 Chronic Kidney Disease and Type 2 Diabetes Mellitus: The VERTIS RENAL Randomized Study. *Diabetes Ther Res Treat Educ Diabetes Relat Disord* 9:49–66 . doi: 10.1007/s13300-017-0337-5
111. Pratley RE, Eldor R, Raji A, et al (2018) Ertugliflozin plus sitagliptin versus either individual agent over 52 weeks in patients with type 2 diabetes mellitus inadequately controlled with metformin: The VERTIS FACTORIAL randomized trial. *Diabetes Obes Metab* 20:1111–1120 . doi: 10.1111/dom.13194



- 1  
2 112. Frías JP, Guja C, Hardy E, et al (2016) Exenatide once weekly plus dapagliflozin once  
3 daily versus exenatide or dapagliflozin alone in patients with type 2 diabetes  
4 inadequately controlled with metformin monotherapy (DURATION-8): a 28 week,  
5 multicentre, double-blind, phase 3, randomised controlled trial. *Lancet Diabetes*  
6 *Endocrinol* 4:1004–1016 . doi: 10.1016/S2213-8587(16)30267-4  
7
- 8  
9 113. Rosenstock J, Cefalu WT, Lapuerta P, et al (2015) Greater dose-ranging effects on A1C  
10 levels than on glucosuria with LX4211, a dual inhibitor of SGLT1 and SGLT2, in patients  
11 with type 2 diabetes on metformin monotherapy. *Diabetes Care* 38:431–438 . doi:  
12 10.2337/dc14-0890  
13
- 14  
15 114. Rosenstock J, Jelaska A, Zeller C, et al (2015) Impact of empagliflozin added on to  
16 basal insulin in type 2 diabetes inadequately controlled on basal insulin: a 78-week  
17 randomized, double-blind, placebo-controlled trial. *Diabetes Obes Metab* 17:936–948  
18
- 19  
20 115. Rosenstock J, Jelaska A, Frappin G, et al (2014) Improved Glucose Control With  
21 Weight Loss, Lower Insulin Doses, and No Increased Hypoglycemia With Empagliflozin  
22 Added to Titrated Multiple Daily Injections of Insulin in Obese Inadequately Controlled  
23 Type 2 Diabetes. *Diabetes Care* 37:1815–1823 . doi: 10.2337/dc13-3055  
24
- 25  
26 116. Lewin A, DeFronzo RA, Patel S, et al (2015) Initial Combination of Empagliflozin and  
27 Linagliptin in Subjects With Type 2 Diabetes. *Diabetes Care* 38:394–402 . doi:  
28 10.2337/dc14-2365  
29
- 30  
31 117. Hadjadj S, Rosenstock J, Meinicke T, et al (2016) Initial Combination of Empagliflozin  
32 and Metformin in Patients With Type 2 Diabetes. *Diabetes Care* 39:1718–1728 . doi:  
33 10.2337/dc16-0522  
34
- 35  
36 118. Rosenstock J, Chuck L, González-Ortiz M, et al (2016) Initial Combination Therapy With  
37 Canagliflozin Plus Metformin Versus Each Component as Monotherapy for Drug-Naïve  
38 Type 2 Diabetes. *Diabetes Care* 39:353–362 . doi: 10.2337/dc15-1736  
39
- 40  
41 119. Kashiwagi A, Kazuta K, Takinami Y, et al (2015) Ipragliflozin improves glycemic control  
42 in Japanese patients with type 2 diabetes mellitus: the BRIGHTEN study: BRIGHTEN:  
43 double-blind randomized study of ipragliflozin to show its efficacy as monotherapy in  
44 T2DM patients. *Diabetol Int* 6:8–18 . doi: 10.1007/s13340-014-0164-0  
45
- 46  
47 120. Goto K, Kashiwagi A, Kazuta K, et al (2012) Ipragliflozin reduces A1C and body weight  
48 in type 2 diabetes patients who have inadequate glycemic control on metformin alone:  
49 Illuminate study. *Diabetes* 61:A212–A344  
50
- 51  
52 121. Bode B, Stenlöf K, Harris S, et al (2015) Long-term efficacy and safety of canagliflozin  
53 over 104 weeks in patients aged 55–80 years with type 2 diabetes. *Diabetes Obes*  
54 *Metab* 17:294–303  
55
- 56  
57 122. Gupta S, Shaikh S, Joshi P, et al (2017) Long-Term Efficacy and Safety of  
58 Empagliflozin Monotherapy in Drug-Naïve Patients with Type 2 Diabetes in Indian  
59 Subgroup: Results from a 76-week Extension Trial of Phase III, Double-Blind,  
60 Randomized Study. *Indian J Endocrinol Metab* 21:286 . doi: 10.4103/ijem.IJEM\_517\_16

123. Del Prato S, Nauck M, Duran-Garcia S, et al (2015) Long-term glycaemic response and tolerability of dapagliflozin versus a sulphonylurea as add-on therapy to metformin in patients with type 2 diabetes: 4-year data. *Diabetes Obes Metab* 17:581–590
124. Ferrannini E, Berk A, Hantel S, et al (2013) Long-Term Safety and Efficacy of Empagliflozin, Sitagliptin, and Metformin: An active-controlled, parallel-group, randomized, 78-week open-label extension study in patients with type 2 diabetes. *Diabetes Care* 36:4015–4021 . doi: 10.2337/dc13-0663
125. Tanizawa Y, Kaku K, Araki E, et al (2014) Long-term safety and efficacy of tofogliflozin, a selective inhibitor of sodium-glucose cotransporter 2, as monotherapy or in combination with other oral antidiabetic agents in Japanese patients with type 2 diabetes mellitus: multicenter, open-label, randomized controlled trials. *Expert Opin Pharmacother* 15:749–766 . doi: 10.1517/14656566.2014.887680
126. Kohan DE, Fioretto P, Tang W, List JF (2014) Long-term study of patients with type 2 diabetes and moderate renal impairment shows that dapagliflozin reduces weight and blood pressure but does not improve glycemic control. *Kidney Int* 85:962–971
127. Araki E, Tanizawa Y, Tanaka Y, et al (2015) Long-term treatment with empagliflozin as add-on to oral antidiabetes therapy in Japanese patients with type 2 diabetes mellitus. *Diabetes Obes Metab* 17:665–674 . doi: 10.1111/dom.12464
128. Zhao X, Cui Y, Zhao S, et al (2015) Pharmacokinetic and Pharmacodynamic Properties and Tolerability of Single- and multiple-dose Once-daily Empagliflozin, a Sodium Glucose Cotransporter 2 Inhibitor, in Chinese Patients With Type 2 Diabetes Mellitus. *Clin Ther* 37:1493–1502 . doi: 10.1016/j.clinthera.2015.05.001
129. Kadokura T, Akiyama N, Kashiwagi A, et al (2014) Pharmacokinetic and pharmacodynamic study of ipragliflozin in Japanese patients with type 2 diabetes mellitus: A randomized, double-blind, placebo-controlled study. *Diabetes Res Clin Pract* 106:50–56 . doi: 10.1016/j.diabres.2014.07.020
130. Sasaki T, Seino Y, Fukatsu A, et al (2015) Pharmacokinetics, Pharmacodynamics, and Safety of Luseogliflozin in Japanese Patients with Type 2 Diabetes Mellitus: A Randomized, Single-blind, Placebo-controlled Trial. *Adv Ther* 32:319–340 . doi: 10.1007/s12325-015-0200-x
131. Terra SG, Focht K, Davies M, et al (2017) Phase III, efficacy and safety study of ertugliflozin monotherapy in people with type 2 diabetes mellitus inadequately controlled with diet and exercise alone: TERRA ET AL . *Diabetes Obes Metab* 19:721–728 . doi: 10.1111/dom.12888
132. Sykes AP, Kemp GL, Dobbins R, et al (2015) Randomized efficacy and safety trial of once-daily remogliflozin etabonate for the treatment of type 2 diabetes. *Diabetes Obes Metab* 17:98–101
133. Sykes AP, O'Connor-Semmes R, Dobbins R, et al (2015) Randomized trial showing efficacy and safety of twice-daily remogliflozin etabonate for the treatment of type 2 diabetes. *Diabetes Obes Metab* 17:94–97

- 1  
2 134. Mathieu C, Ranetti AE, Li D, et al (2015) Randomized, Double-Blind, Phase 3 Trial of  
3 Triple Therapy With Dapagliflozin Add-on to Saxagliptin Plus Metformin in Type 2  
4 Diabetes. *Diabetes Care* 38:2009–2017 . doi: 10.2337/dc15-0779  
5
- 6 135. Kashiwagi A, Kazuta K, Yoshida S, Nagase I (2014) Randomized, placebo-controlled,  
7 double-blind glycemic control trial of novel sodium-dependent glucose cotransporter 2  
8 inhibitor ipragliflozin in Japanese patients with type 2 diabetes mellitus. *J Diabetes*  
9 *Investig* 5:382–391 . doi: 10.1111/jdi.12156  
10
- 11 136. Townsend RR, Machin I, Ren J, et al (2016) Reductions in Mean 24-Hour Ambulatory  
12 Blood Pressure After 6-Week Treatment With Canagliflozin in Patients With Type 2  
13 Diabetes Mellitus and Hypertension. *J Clin Hypertens* 18:43–52 . doi:  
14 10.1111/jch.12747  
15
- 16 137. On behalf of the EMPA-REG EXTEND™ MONO investigators, Roden M, Merker L, et al  
17 (2015) Safety, tolerability and effects on cardiometabolic risk factors of empagliflozin  
18 monotherapy in drug-naïve patients with type 2 diabetes: a double-blind extension of a  
19 Phase III randomized controlled trial. *Cardiovasc Diabetol* 14: . doi: 10.1186/s12933-  
20 015-0314-0  
21
- 22 138. Heise T, Seewaldt-Becker E, Macha S, et al (2013) Safety, tolerability,  
23 pharmacokinetics and pharmacodynamics following 4 weeks' treatment with  
24 empagliflozin once daily in patients with type 2 diabetes. *Diabetes Obes Metab* 15:613–  
25 621  
26
- 27 139. Heise T, Seman L, Macha S, et al (2013) Safety, Tolerability, Pharmacokinetics, and  
28 Pharmacodynamics of Multiple Rising Doses of Empagliflozin in Patients with Type 2  
29 Diabetes Mellitus. *Diabetes Ther* 4:331–345 . doi: 10.1007/s13300-013-0030-2  
30
- 31 140. List JF, Woo V, Morales E, et al (2009) Sodium-glucose cotransport inhibition with  
32 dapagliflozin in type 2 diabetes. *Diabetes Care* 32:650–657  
33
- 34 141. Wan Seman WJ, Kori N, Rajoo S, et al (2016) Switching from sulphonylurea to a  
35 sodium-glucose cotransporter2 inhibitor in the fasting month of Ramadan is associated  
36 with a reduction in hypoglycaemia. *Diabetes Obes Metab* 18:628–632  
37
- 38 142. Jabbour SA, Hardy E (2014) To assess the efficacy and safety of dapagliflozin as add-  
39 on therapy in patients with type 2 diabetes who were inadequately controlled with a  
40 dipeptidyl peptidase-4 inhibitor with or without metformin. *Diabetes Care* 37:740–750  
41
- 42 143. Schumm-Draeger P-M, Burgess L, Koranyi L, et al (2015) Twice-daily dapagliflozin co-  
43 administered with metformin in type 2 diabetes: a 16-week randomized, placebo-  
44 controlled clinical trial. *Diabetes Obes Metab* 17:42–51  
45
- 46 144. Zinman B, Wanner C, Lachin JM, et al (2015) Empagliflozin, Cardiovascular Outcomes,  
47 and Mortality in Type 2 Diabetes. *N Engl J Med*. doi: 10.1056/NEJMoa1504720  
48
- 49 145. Szalat A, Perlman A, Muszkat M, et al (2017) Can SGLT2 Inhibitors Cause Acute Renal  
50 Failure? Plausible Role for Altered Glomerular Hemodynamics and Medullary Hypoxia.  
51 *Drug Saf* 1–14 . doi: 10.1007/s40264-017-0602-6  
52  
53  
54  
55  
56  
57  
58  
59

- 1  
2 146. Hahn K, Ejaz AA, Kanbay M, et al (2016) Acute kidney injury from SGLT2 inhibitors:  
3 potential mechanisms. In: *Nat. Rev. Nephrol.*  
4 <https://www.nature.com/articles/nrneph.2016.159>. Accessed 6 Jun 2018  
5
- 6 147. Nadkarni GN, Ferrandino R, Chang A, et al (2017) Acute Kidney Injury in Patients on  
7 SGLT2 Inhibitors: A Propensity-Matched Analysis. *Diabetes Care* 40:1479–1485 . doi:  
8 10.2337/dc17-1011  
9
- 10 148. Ogawa W, Sakaguchi K (2016) Euglycemic diabetic ketoacidosis induced by SGLT2  
11 inhibitors: possible mechanism and contributing factors. *J Diabetes Investig* 7:135–138 .  
12 doi: 10.1111/jdi.12401  
13  
14
- 15 149. Jensen ML, Persson F, Andersen GS, et al (2017) Incidence of Ketoacidosis in the  
16 Danish Type 2 Diabetes Population Before and After Introduction of Sodium-Glucose  
17 Cotransporter 2 Inhibitors-A Nationwide, Retrospective Cohort Study, 1995-2014.  
18 *Diabetes Care* 40:e57–e58 . doi: 10.2337/dc16-2793  
19
- 20 150. Fralick M, Schneeweiss S, Patorno E (2017) Risk of Diabetic Ketoacidosis after  
21 Initiation of an SGLT2 Inhibitor. *N Engl J Med* 376:2300–2302 . doi:  
22 10.1056/NEJMc1701990  
23  
24
- 25 151. Fadini GP, Bonora BM, Avogaro A (2017) SGLT2 inhibitors and diabetic ketoacidosis:  
26 data from the FDA Adverse Event Reporting System. *Diabetologia* 60:1385–1389 . doi:  
27 10.1007/s00125-017-4301-8  
28  
29
- 30 152. Iijima H, Kifuji T, Maruyama N, Inagaki N (2015) Pharmacokinetics, Pharmacodynamics,  
31 and Safety of Canagliflozin in Japanese Patients with Type 2 Diabetes Mellitus. *Adv*  
32 *Ther* 32:768–782 . doi: 10.1007/s12325-015-0234-0  
33
- 34 153. Devineni D, Polidori D (2015) Clinical Pharmacokinetic, Pharmacodynamic, and Drug-  
35 Drug Interaction Profile of Canagliflozin, a Sodium-Glucose Co-transporter 2 Inhibitor.  
36 *Clin Pharmacokinet* 54:1027–1041 . doi: 10.1007/s40262-015-0285-z  
37  
38
- 39 154. Devineni D, Polidori D, Curtin CR, et al (2015) Pharmacokinetics and  
40 pharmacodynamics of once- and twice-daily multiple-doses of canagliflozin, a selective  
41 inhibitor of sodium glucose co-transporter 2, in healthy participants. *Int J Clin Pharmacol*  
42 *Ther* 53:438–446 . doi: 10.5414/CP202324  
43
- 44 155. Devineni D, Curtin CR, Polidori D, et al (2013) Pharmacokinetics and  
45 pharmacodynamics of canagliflozin, a sodium glucose co-transporter 2 inhibitor, in  
46 subjects with type 2 diabetes mellitus. *J Clin Pharmacol* 53:601–610 . doi:  
47 10.1002/jcph.88  
48  
49
- 50 156. Parkinson J, Tang W, Johansson C-C, et al (2016) Comparison of the exposure-  
51 response relationship of dapagliflozin in adult and paediatric patients with type 2  
52 diabetes mellitus. *Diabetes Obes Metab* 18:685–692 . doi: 10.1111/dom.12647  
53
- 54 157. Taylor SI, Blau JE, Rother KI (2015) SGLT2-inhibitors Trigger Downstream Mechanisms  
55 That May Exert Adverse Effects Upon Bone. *Lancet Diabetes Endocrinol* 3:8–10 . doi:  
56 10.1016/S2213-8587(14)70227-X  
57  
58  
59

- 1  
2 158. Bode B, Stenlöf K, Harris S, et al (2015) Long-term efficacy and safety of canagliflozin  
3 over 104 weeks in patients aged 55-80 years with type 2 diabetes. *Diabetes Obes*  
4 *Metab* 17:294–303 . doi: 10.1111/dom.12428  
5
- 6 159. Loke YK, Price D, Herxheimer A, Cochrane Adverse Effects Methods Group (2007)  
7 Systematic reviews of adverse effects: framework for a structured approach. *BMC Med*  
8 *Res Methodol* 7:32 . doi: 10.1186/1471-2288-7-32  
9

10  
11  
12  
13  
14  
15  
16  
17  
18  
19  
20  
21  
22  
23  
24  
25  
26  
27  
28  
29  
30  
31  
32  
33  
34  
35  
36  
37  
38  
39  
40  
41  
42  
43  
44  
45  
46  
47  
48  
49  
50  
51  
52  
53  
54  
55  
56  
57  
58  
59  
60

For peer review only

## Tables

Table 1. Sub-group Analysis among Placebo Controlled Trials

| Group                              | Relative Risk<br>(95% CI, I <sup>2</sup> ) | # of<br>Studies | Total # of<br>outcomes/patients |
|------------------------------------|--------------------------------------------|-----------------|---------------------------------|
| <b>Prior use of anti-diabetics</b> |                                            |                 |                                 |
| AKI                                |                                            |                 |                                 |
| Prior/Concurrent Diabetes Therapy  | 0.51 (0.14-1.84; 0.72%)                    | 6               | 90/10,651                       |
| Treatment Naïve                    | 0.60 (0.39-0.92; 0.00%)                    | 2               |                                 |
| DKA                                |                                            |                 |                                 |
| Prior/Concurrent Diabetes Therapy  | 0.65 (0.25-1.71; 0.00%)                    | 14              | 13/14,353                       |
| Treatment Naïve                    | 0.66 (0.16-2.71; 0.00%)                    | 4               |                                 |
| UTI                                |                                            |                 |                                 |
| Prior/Concurrent Diabetes Therapy  | 1.04 (0.93-1.16; 8.22%)                    | 64              | 3,405/39,331                    |
| Treatment Naïve                    | 1.00 (0.91-1.10; 0.00%)                    | 23              |                                 |
| Fracture                           |                                            |                 |                                 |
| Prior/Concurrent Diabetes Therapy  | 0.81 (0.57-1.14; 2.61%)                    | 39              | 445/29,668                      |
| Treatment Naïve                    | 0.79 (0.46-1.36; 6.30%)                    | 11              |                                 |
| <b>Risk of Bias</b>                |                                            |                 |                                 |
| AKI                                |                                            |                 |                                 |
| Low Risk of Bias                   | 0.58 (0.38-0.89; 0.0%)                     | 4               | 90/10,651                       |
| High Risk of Bias                  | 0.71 (0.12-4.37; 25.5%)                    | 4               |                                 |
| DKA                                |                                            |                 |                                 |
| Low Risk of Bias                   | 0.85 (0.28-2.61; 0.0%)                     | 10              | 13/14,353                       |
| High Risk of Bias                  | 0.49 (0.003-71.59; 94.8%)                  | 8               |                                 |
| UTI                                |                                            |                 |                                 |
| Low Risk of Bias                   | 1.00 (0.92-1.08; 0.0%)                     | 51              | 3,405/39,331                    |
| High Risk of Bias                  | 1.05 (0.11-10.43; 99.7%)                   | 37              |                                 |
| Fracture                           |                                            |                 |                                 |
| Low Risk of Bias                   | 0.95 (0.76-1.18; 0.0%)                     | 22              | 445/29,668                      |
| High Risk of Bias                  | 0.58 (0.04-8.77; 97.0%)                    | 27              |                                 |
| <b>Definition of UT</b>            |                                            |                 |                                 |
| UTI                                |                                            |                 |                                 |
| Predefined list of terms           | 0.99 (0.91-1.07; 0.0%)                     | 19              | 3,405/39,331                    |
| Suggestive of UTI                  | 1.13 (0.87-1.47; 0.0%)                     | 11              |                                 |
| Positive culture                   | 0.91 (0.51-1.62; 24.27%)                   | 2               |                                 |
| As per investigator                | 0.82 (0.41-1.61; 0.0%)                     | 2               |                                 |
| Not defined                        | 1.08 (0.90-1.29; 15.47%)                   | 54              |                                 |

## List of Figures

All figures supplied as separate documents.

*Figure 1. Flow Diagram for Included Studies*

*Figure 2. Risk of acute kidney injury with SGLT2 inhibitors compared to placebo*

*Figure 3. Risk of diabetic ketoacidosis from SGLT2 inhibitors compared to placebo*

*Figure 4. Risk of urinary tract infections with SGLT2 inhibitor compared to placebo*

*Figure 4. Risk of urinary tract infection with SGLT2 inhibitors compared to other active treatments*

*Figure 5. Risk of fracture with SGLT2 inhibitors compared to placebo*

For peer review only



1  
2  
3  
4  
5  
6  
7  
8  
9  
10  
11  
12  
13  
14  
15  
16  
17  
18  
19  
20  
21  
22  
23  
24  
25  
26  
27  
28  
29  
30  
31  
32  
33  
34  
35  
36  
37  
38  
39  
40  
41  
42  
43  
44  
45  
46  
47  
48  
49  
50  
51  
52  
53  
54  
55  
56  
57  
58  
59  
60

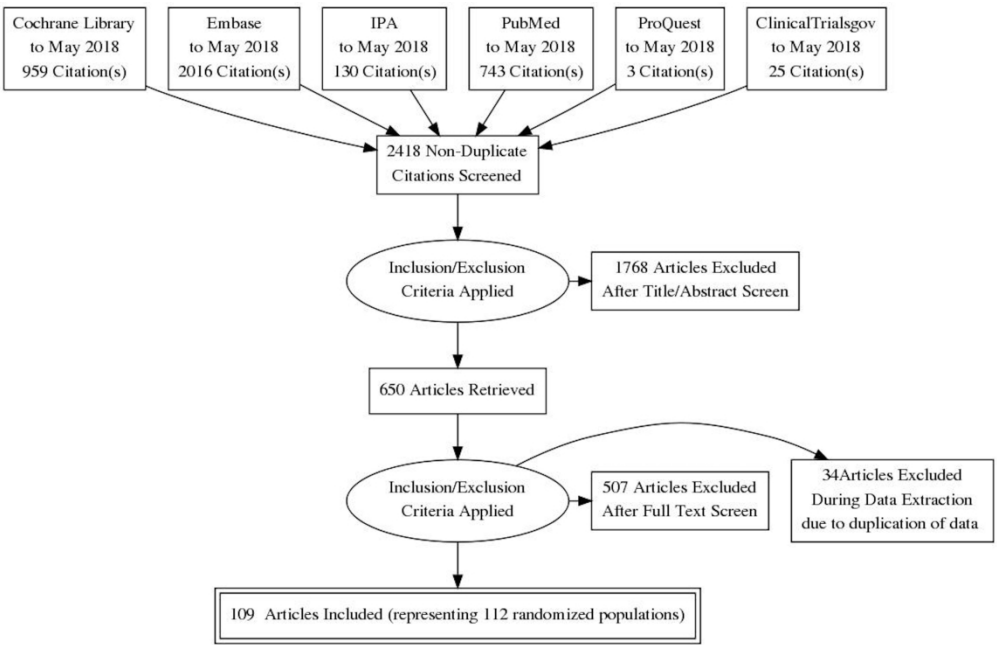

Figure 1 Flow Diagram of Included Studies

372x240mm (300 x 300 DPI)

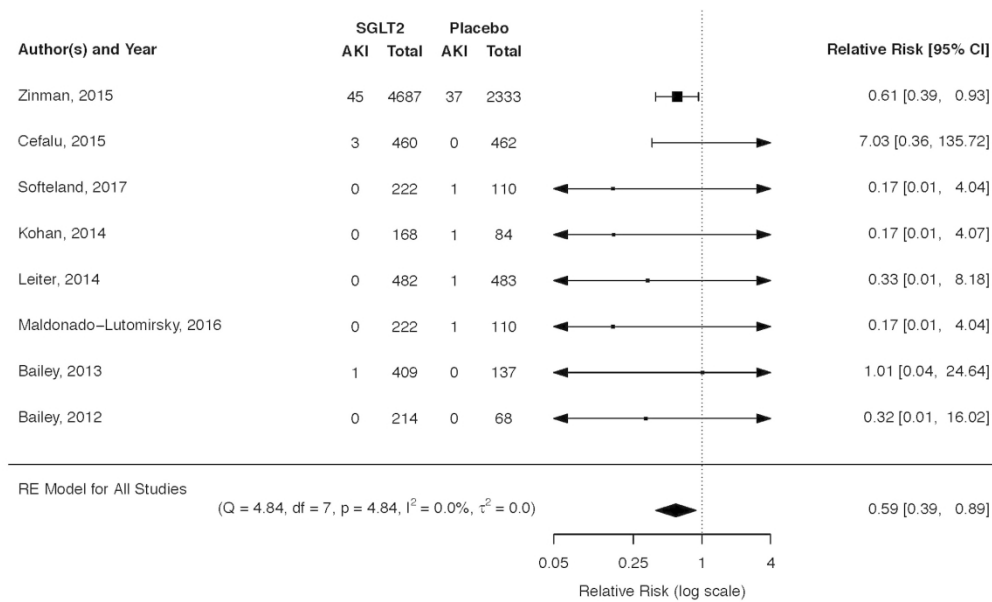

Figure 2. Risk of Acute Kidney Injury with SGLT2 Inhibitors Compared to Placebo

270x162mm (300 x 300 DPI)

1  
2  
3  
4  
5  
6  
7  
8  
9  
10  
11  
12  
13  
14  
15  
16  
17  
18  
19  
20  
21  
22  
23  
24  
25  
26  
27  
28  
29  
30  
31  
32  
33  
34  
35  
36  
37  
38  
39  
40  
41  
42  
43  
44  
45  
46  
47  
48  
49  
50  
51  
52  
53  
54  
55  
56  
57  
58  
59  
60

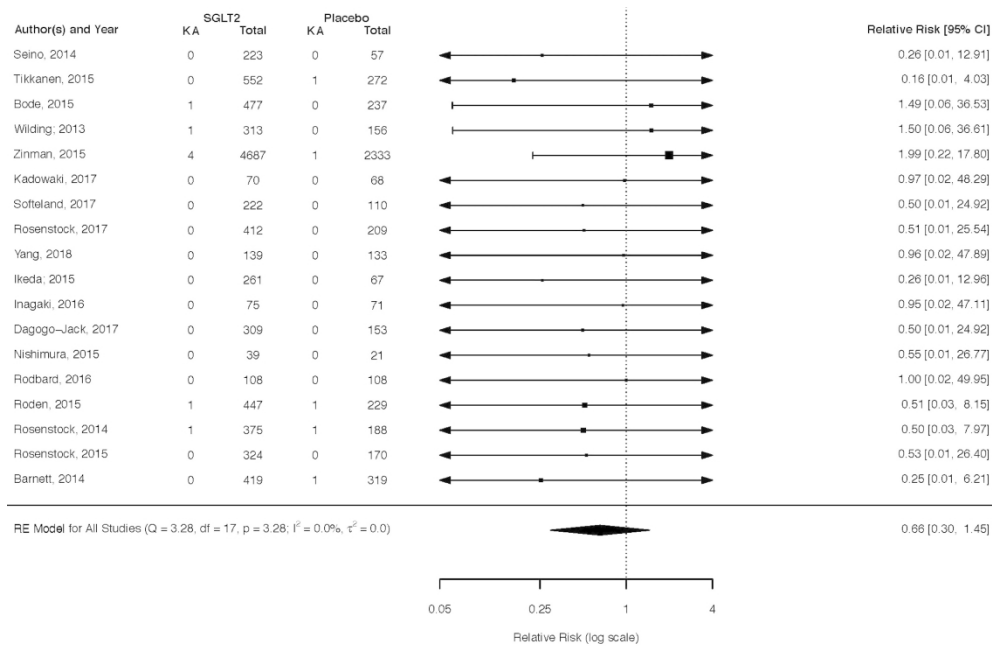

Figure 3. Risk of Diabetic Ketoacidosis from SGLT2 inhibitors compared to placebo

269x175mm (300 x 300 DPI)

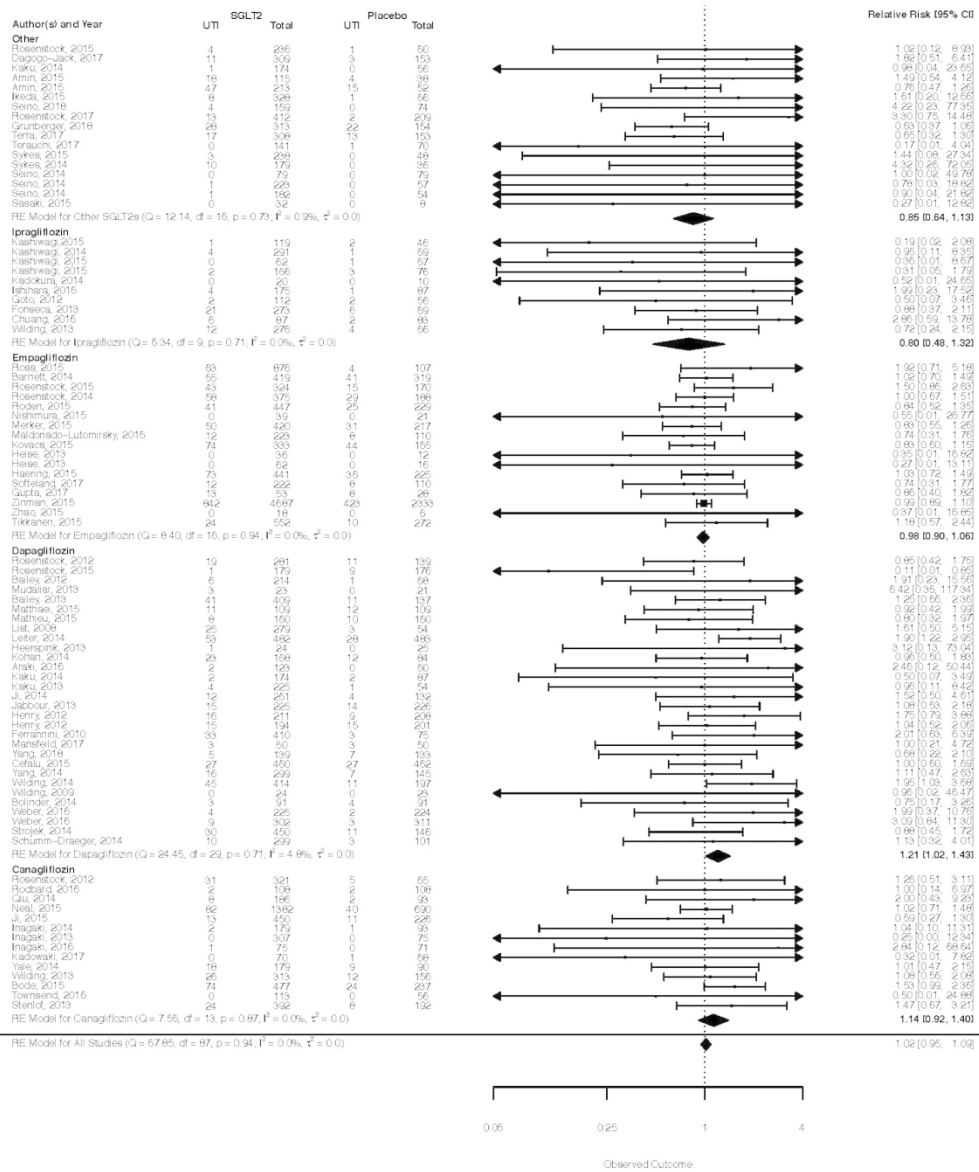

Figure 4. Risk of Urinary Tract Infection with SGLT2 Inhibitors Compared to Placebo  
207x243mm (300 x 300 DPI)

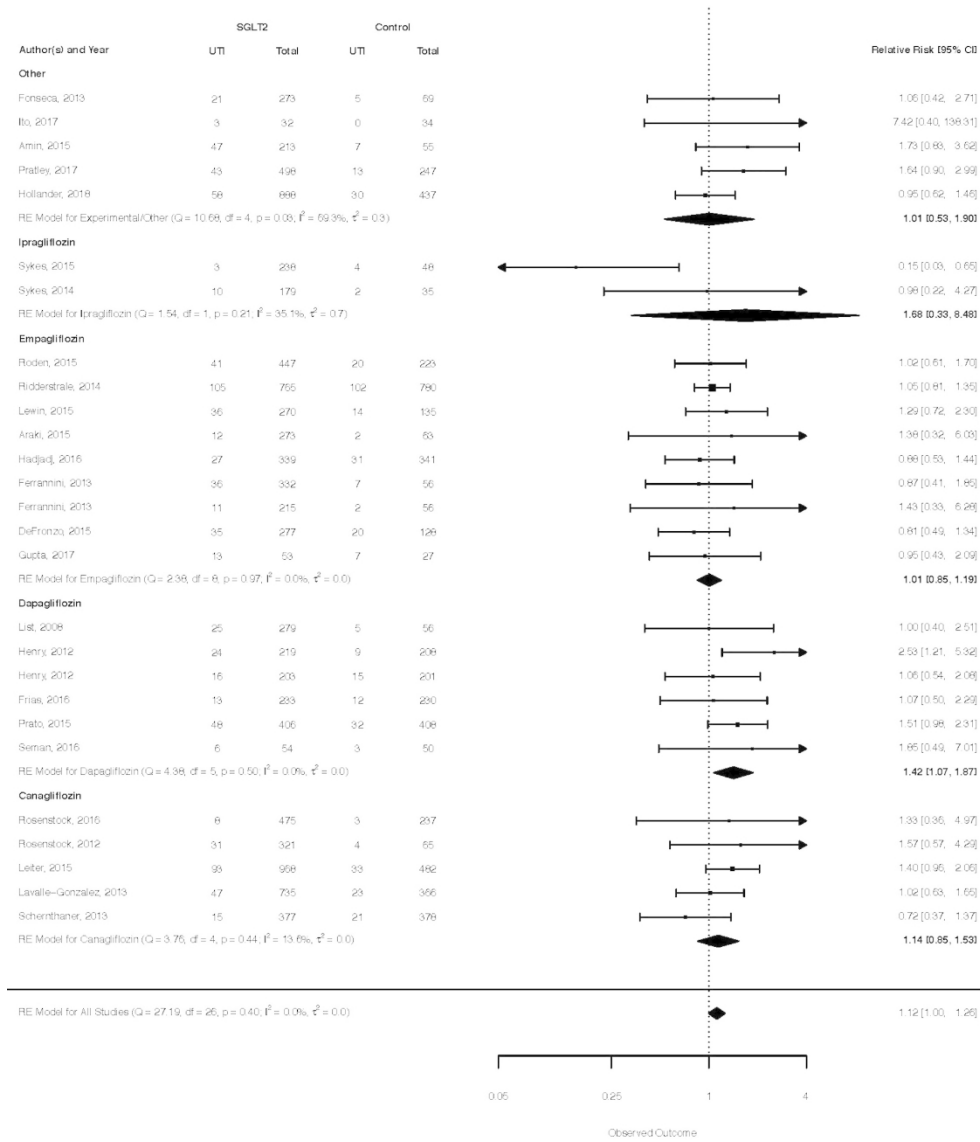

Figure 5. Risk of Urinary Tract Infection with SGLT2 Inhibitors Compared to Active Comparators

208x237mm (300 x 300 DPI)

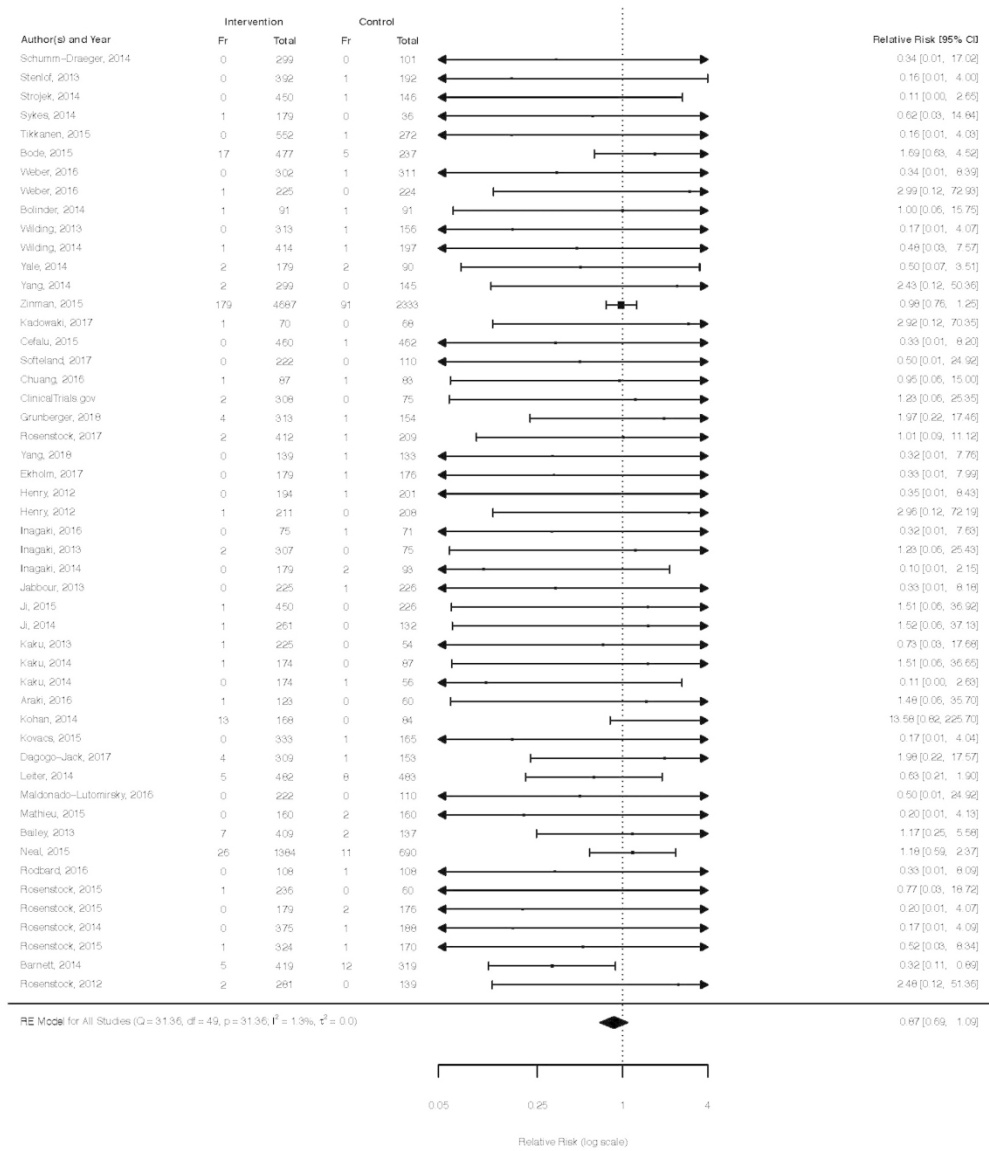

Figure 6. Risk of Fracture with SGLT2 Inhibitors Compared to Placebo

208x240mm (300 x 300 DPI)

## Comparative safety of the sodium glucose co-transporter 2 (SGLT2) inhibitors: A systematic review and meta-analysis.

### Online Appendix

#### Section 1: Search Strategies

Table 1A. Pubmed Search Strategy

|   |                                                                                                                                                                 | Search String                                                                                                                                                                                                                                                                                                                                                                                                                                                                                                                                                                                                                                                                                                                                                                                                                                                                                                                                                                                                                                                                                                                                                                                                                                                                                                                                                                                                                                                                                                                                                                                                                                                                                                     | Results |
|---|-----------------------------------------------------------------------------------------------------------------------------------------------------------------|-------------------------------------------------------------------------------------------------------------------------------------------------------------------------------------------------------------------------------------------------------------------------------------------------------------------------------------------------------------------------------------------------------------------------------------------------------------------------------------------------------------------------------------------------------------------------------------------------------------------------------------------------------------------------------------------------------------------------------------------------------------------------------------------------------------------------------------------------------------------------------------------------------------------------------------------------------------------------------------------------------------------------------------------------------------------------------------------------------------------------------------------------------------------------------------------------------------------------------------------------------------------------------------------------------------------------------------------------------------------------------------------------------------------------------------------------------------------------------------------------------------------------------------------------------------------------------------------------------------------------------------------------------------------------------------------------------------------|---------|
| 1 | Population                                                                                                                                                      | "Diabetes Mellitus, Type 2"[Mesh] OR NIDDM[tw] OR t2dm[tw] OR (("type 2"[tw] OR "type ii"[tw] OR "adult onset"[tw] OR "mature onset"[tw] OR "late onset"[tw] OR "noninsulin-dependent"[tw] OR "non insulin dependent"[tw]) AND diabetes[tw])                                                                                                                                                                                                                                                                                                                                                                                                                                                                                                                                                                                                                                                                                                                                                                                                                                                                                                                                                                                                                                                                                                                                                                                                                                                                                                                                                                                                                                                                      | 167100  |
| 2 | Intervention:<br>SGLT2s                                                                                                                                         | "Sodium-Glucose Transport Proteins/antagonists and inhibitors"[Mesh] OR "Sodium-Glucose Transporter 2"[Mesh] OR "sodium-glucose co-transporter 2"[tw] OR SGL2[tw] OR SGLT2[tw] OR gliflozin*[tw] OR "Canagliflozin"[Mesh] OR canagliflozin*[tw] OR invokana[tw] OR sulisent[tw] OR "TA 7284"[tw] OR TA7284[tw] OR "JNJ 28431754"[tw] OR JNJ28431754[tw] OR "2-(3-(4-ethoxybenzyl)-4-chlorophenyl)-6-hydroxymethyltetrahydro-2H-pyran-3,4,5-triol"[Supplementary Concept] OR dapagliflozin*[tw] OR farxiga[tw] OR forxiga[tw] OR "BMS 512148"[tw] OR BMS512148[tw] OR "empagliflozin"[Supplementary Concept] OR empagliflozin*[tw] OR jardiance[tw] OR "BI 10773"[tw] OR BI10773[tw] OR ipragliflozin[Supplementary Concept] OR ipragliflozin*[tw] OR suglat[tw] OR "ASP 1941"[tw] OR ASP1941[tw] OR "1,5-anhydro-1-(5-(4-ethoxybenzyl)-2-methoxy-4-methylphenyl)-1-thioglutitol"[Supplementary Concept] OR luseogliflozin*[tw] OR lusefi[tw] OR "TS 071"[tw] OR TS071[tw] OR "remogliflozin etabonate"[Supplementary Concept] OR remogliflozin*[tw] OR "KGT 1681"[tw] OR KGT1681[tw] OR "(2S,3R,4R,5S,6R)-2-(4-chloro-3-(4-ethoxybenzyl)phenyl)-6-(methylthio)tetrahydro-2H-pyran-3,4,5-triol" [Supplementary Concept] OR sotagliflozin*[tw] OR "LX 4221"[tw] OR LX4221[tw] OR "6-((4-ethylphenyl)methyl)-3',4',5',6'-tetrahydro-6'-(hydroxymethyl)spiro(isobenzofuran-1(3H),2'-(2H)pyran)-3',4',5'-triole" [Supplementary Concept] OR tofogliflozin*[tw] OR apleway[tw] OR deberza[tw] OR "CSG 452"[tw] OR CSG452[tw] OR "5-(4-chloro-3-(4-ethoxybenzyl)phenyl)-1-hydroxymethyl-6,8-dioxabicyclo(3.2.1)octane-2,3,4-triole" [Supplementary Concept] OR ertugliflozin*[tw] OR "PF 04971729"[tw] OR PF04971729[tw] | 2936    |
| 3 | #1 AND #2                                                                                                                                                       |                                                                                                                                                                                                                                                                                                                                                                                                                                                                                                                                                                                                                                                                                                                                                                                                                                                                                                                                                                                                                                                                                                                                                                                                                                                                                                                                                                                                                                                                                                                                                                                                                                                                                                                   | 2080    |
| 4 | Study Type<br>Filter:<br>Cochrane<br>Highly<br>Sensitive<br>Search<br>Strategy for<br>identifying<br>randomized<br>trials in<br>MEDLINE:<br>sensitivity-<br>and | ("randomized controlled trial"[pt] OR "controlled clinical trial"[pt] OR randomized[tiab] OR placebo[tiab] OR "clinical trials as topic"[Mesh:NoExp] OR randomly[tiab] OR trial[tj]) NOT (animals[mh] NOT humans[mh])                                                                                                                                                                                                                                                                                                                                                                                                                                                                                                                                                                                                                                                                                                                                                                                                                                                                                                                                                                                                                                                                                                                                                                                                                                                                                                                                                                                                                                                                                             | 1065055 |



|   |                                                                                                                                                                                                                                                                        |  |     |
|---|------------------------------------------------------------------------------------------------------------------------------------------------------------------------------------------------------------------------------------------------------------------------|--|-----|
|   | precision-maximizing version (2008 revision). Available at <a href="http://handbook.cochrane.org/chapter_6/box_6_4_box_cochrane_hsss_2008_sensprec_publication.htm">http://handbook.cochrane.org/chapter_6/box_6_4_box_cochrane_hsss_2008_sensprec_publication.htm</a> |  |     |
| 5 | <b>#3 AND #4</b>                                                                                                                                                                                                                                                       |  | 743 |

Table 2A: Cochrane Library Search Strategy

|    |                                                                                                                                                                                                                                                                                                                                                                                                                                                                                                                                                                                                                                                                                                                         |        |
|----|-------------------------------------------------------------------------------------------------------------------------------------------------------------------------------------------------------------------------------------------------------------------------------------------------------------------------------------------------------------------------------------------------------------------------------------------------------------------------------------------------------------------------------------------------------------------------------------------------------------------------------------------------------------------------------------------------------------------------|--------|
| #1 | ([mh "Diabetes Mellitus, Type 2"] or NIDDM or t2dm or ("type 2" or "type ii" or "adult onset" or "mature onset" or "late onset" or "noninsulin-dependent" or "non insulin dependent") and (diabetes)))                                                                                                                                                                                                                                                                                                                                                                                                                                                                                                                  | 25,454 |
| #2 | ([mh "Sodium-Glucose Transport Proteins"/ai] or [mh "Sodium-Glucose Transporter 2"] or "sodium-glucose co-transporter 2" or SGL2 or SGLT2 or gliflozin* or [mh canigliflozin] or canagliflozin* or invokana or sulisent or "TA 7284" or TA7284 or "JNJ 28431754" or JNJ28431754 or dapagliflozin* or farxiga or forxiga or "BMS 512148" or BMS512148 or empagliflozin* or jardiance or "BI 10773" or BI10773 or ipragliflozin or suglat or "ASP 1941" or ASP1941 or luseogliflozin* or lusefi or "TS 071" or TS071 or remogliflozin* or "KGT 1681" or KGT1681 or sotagliflozin* or "LX 4221" or LX4221 or tofogliflozin* or apleway or deberza or "CSG 452" or CSG452 or ertugliflozin* or "PF 04971729" or PF04971729) | 1,082  |
| #3 | <b>#1 AND #2</b>                                                                                                                                                                                                                                                                                                                                                                                                                                                                                                                                                                                                                                                                                                        | 959    |

Table 3A: Embase Search Strategy

| No.                                                                                | Query                                                                                                                                                                                                                                                                                                                                                                                                                                                                                                                                                                                                                                                                                                                                                                                                                                                                                                                                                          | Results   |
|------------------------------------------------------------------------------------|----------------------------------------------------------------------------------------------------------------------------------------------------------------------------------------------------------------------------------------------------------------------------------------------------------------------------------------------------------------------------------------------------------------------------------------------------------------------------------------------------------------------------------------------------------------------------------------------------------------------------------------------------------------------------------------------------------------------------------------------------------------------------------------------------------------------------------------------------------------------------------------------------------------------------------------------------------------|-----------|
| #5                                                                                 | #3 AND #4                                                                                                                                                                                                                                                                                                                                                                                                                                                                                                                                                                                                                                                                                                                                                                                                                                                                                                                                                      | 2,016     |
| #4 - EMBASE RCT filter from Wong 2006, best balance of sensitivity and specificity | random*:ab,ti OR placebo*:de,ab,ti OR (double NEXT/1 blind*):ab,ti                                                                                                                                                                                                                                                                                                                                                                                                                                                                                                                                                                                                                                                                                                                                                                                                                                                                                             | 1,533,336 |
| #3                                                                                 | #1 AND #2                                                                                                                                                                                                                                                                                                                                                                                                                                                                                                                                                                                                                                                                                                                                                                                                                                                                                                                                                      | 4,869     |
| #2                                                                                 | 'sodium glucose cotransporter 2'/de OR 'sodium glucose cotransporter 2 inhibitor'/exp OR 'sodium-glucose co-transporter 2':ab,ti OR sgl2:ab,ti OR sgl2:ab,ti OR gliflozin*:ab,ti OR canagliflozin*:ab,ti OR invokana:ab,ti OR sulisent:ab,ti OR 'ta 7284':ab,ti OR ta7284:ab,ti OR 'jnj 28431754':ab,ti OR jnj28431754:ab,ti OR dapagliflozin*:ab,ti OR farxiga:ab,ti OR forxiga:ab,ti OR 'bms 512148':ab,ti OR bms512148:ab,ti OR empagliflozin*:ab,ti OR jardiance:ab,ti OR 'bi 10773':ab,ti OR bi10773:ab,ti OR ipragliflozin*:ab,ti OR suglat:ab,ti OR 'asp 1941':ab,ti OR asp1941:ab,ti OR luseogliflozin*:ab,ti OR lusefi:ab,ti OR 'ts 071':ab,ti OR ts071:ab,ti OR remogliflozin*:ab,ti OR 'kgt 1681':ab,ti OR kgt1681:ab,ti OR sotagliflozin*:ab,ti or 'LX 4221':ab,ti or LX4221:ab,ti or tofogliflozin*:ab,ti or apleway:ab,ti or deberza:ab,ti or 'CSG 452':ab,ti or CSG452:ab,ti or ertugliflozin*:ab,ti or 'PF 04971729':ab,ti or PF04971729:ab,ti | 6,675     |
| #1                                                                                 | 'non insulin dependent diabetes mellitus'/de OR niddm:ab,ti OR t2dm:ab,ti OR ('type 2':ab,ti OR 'type ii':ab,ti OR 'adult onset':ab,ti OR 'mature onset':ab,ti OR 'late onset':ab,ti OR 'noninsulin dependent':ab,ti OR 'non insulin dependent':ab,ti AND diabetes:ab,ti)                                                                                                                                                                                                                                                                                                                                                                                                                                                                                                                                                                                                                                                                                      | 258,521   |

Table 4A: IPA Search Strategy

| #  | Query                                                                                                                                                                                                                                                                                                                                                                                                                                                                                                                                                                                                     | Limiters/Expanders            | Results |
|----|-----------------------------------------------------------------------------------------------------------------------------------------------------------------------------------------------------------------------------------------------------------------------------------------------------------------------------------------------------------------------------------------------------------------------------------------------------------------------------------------------------------------------------------------------------------------------------------------------------------|-------------------------------|---------|
| S1 | TX NIDDM OR t2dm OR (("type 2" OR "type ii" OR "adult onset" OR "mature onset" OR "late onset" OR "noninsulin dependent" OR "non insulin dependent") AND (diabetes))                                                                                                                                                                                                                                                                                                                                                                                                                                      | Search modes - Boolean/Phrase | 6,110   |
| S2 | TX "sodium-glucose co-transporter 2" OR sgl2 OR sgl2 OR gliflozin OR canagliflozin OR invokana OR sulisent OR "ta 7284" OR ta7284 OR "jnj 28431754" OR jnj28431754 OR dapagliflozin* OR farxiga OR forxiga OR "bms 512148" OR bms512148 OR empagliflozin* OR jardiance OR "bi 10773" OR bi10773 OR ipragliflozin* OR suglat OR "asp 1941" OR asp1941 OR luseogliflozin* OR lusefi OR "ts 071" OR ts071 OR remogliflozin* OR "kgt 1681" OR kgt1681 OR sotagliflozin* OR "LX 4221" OR LX4221 OR tofogliflozin* OR apleway OR deberza OR "CSG452" OR CSG452 OR ertugliflozin* OR "PF 04971729" OR PF04971729 | Search modes - Boolean/Phrase | 337     |
| S3 | S1 AND S2                                                                                                                                                                                                                                                                                                                                                                                                                                                                                                                                                                                                 | Search modes - Boolean/Phrase | 267     |
| S4 | TI randomized OR AB randomized OR TI randomised OR AB randomised OR TI placebo OR AB placebo OR TI randomly OR AB randomly OR TI trial                                                                                                                                                                                                                                                                                                                                                                                                                                                                    | Search modes - Boolean/Phrase | 59,232  |
| S5 | S3 AND S4                                                                                                                                                                                                                                                                                                                                                                                                                                                                                                                                                                                                 | Search modes - Boolean/Phrase | 130     |

Table 5A: ProQuest Search Strategy

|                                                                                                                                                                                                                                                                                                                                                                                                                                                                                                                                                                                                                                                                             |   |
|-----------------------------------------------------------------------------------------------------------------------------------------------------------------------------------------------------------------------------------------------------------------------------------------------------------------------------------------------------------------------------------------------------------------------------------------------------------------------------------------------------------------------------------------------------------------------------------------------------------------------------------------------------------------------------|---|
| all(NIDDM OR t2dm OR (("type 2" OR "type ii" OR "adult onset" OR "mature onset" OR "late onset" OR "noninsulin-dependent" OR "non insulin dependent") AND (diabetes))) AND all("sodium-glucose co-transporter 2" OR SGL2 OR SGLT2 OR gliflozin* OR canagliflozin* OR invokana OR sulisent OR "TA 7284" OR TA7284 OR "JNJ 28431754" OR JNJ28431754 OR dapagliflozin* OR farxiga OR forxiga OR "BMS 512148" OR BMS512148 OR empagliflozin* OR jardiance OR "BI 10773" OR BI10773 OR ipragliflozin OR suglat OR "ASP 1941" OR ASP1941 OR luseogliflozin* OR lusefi OR "TS 071" OR TS071 OR remogliflozin* OR "KGT 1681" OR KGT1681 OR sotagliflozin* OR "LX 4221" OR LX4221 OR | 3 |
|-----------------------------------------------------------------------------------------------------------------------------------------------------------------------------------------------------------------------------------------------------------------------------------------------------------------------------------------------------------------------------------------------------------------------------------------------------------------------------------------------------------------------------------------------------------------------------------------------------------------------------------------------------------------------------|---|

1  
2  
3  
4 tofogliflozin\* OR apleway OR deberza OR "CSG 452" OR CSG452 OR ertugliflozin\* OR "PF  
5 04971729" OR PF04971729)  
6  
7

## 8 Section 2: List of Extracted Variables

9  
10  
11 *Table 6A. List of Extracted Variables*

| 12 Variable Extraction                       | 13 Notes                                                                      |
|----------------------------------------------|-------------------------------------------------------------------------------|
| 14 NCT Number, Author and Year               |                                                                               |
| 15 Country in which the study was conducted  | 16 International if applicable                                                |
| 17 Start and End years                       |                                                                               |
| 18 Observation Period (# of weeks)           |                                                                               |
| 19 Total number of participants randomized   |                                                                               |
| 20 Number of Males                           |                                                                               |
| 21 Number of Females                         |                                                                               |
| 22 Background diabetes therapy               |                                                                               |
| 23 Intervention 1: SGLT2 Agent               | 24 This was captured for as many interventions that were<br>25 used.          |
| 26 Intervention 1: Dose                      |                                                                               |
| 27 Intervention 1: Number of Persons         |                                                                               |
| 28 Intervention 1: Mean Age                  |                                                                               |
| 29 Intervention 1: Age SD                    |                                                                               |
| 30 Intervention 1: Mean baseline HbA1C       |                                                                               |
| 31 Intervention 1: A1C SD                    | 32 This was captured for as many comparison groups that<br>33 were used.      |
| 34 Comparison 1: SGLT2 Agent                 |                                                                               |
| 35 Comparison 1: Dose                        |                                                                               |
| 36 Comparison 1: Number of Persons           |                                                                               |
| 37 Comparison 1: Mean Age                    |                                                                               |
| 38 Comparison 1: Age SD                      |                                                                               |
| 39 Comparison 1: Mean baseline HbA1C         |                                                                               |
| 40 Comparison 1: A1C SD                      |                                                                               |
| 41 Acute Kidney Injury Reported (yes/no)     |                                                                               |
| 42 Urinary Tract Infection Reported (yes/no) |                                                                               |
| 43 Definition of UTI                         |                                                                               |
| 44 Ketoacidosis Reported (yes/no)            |                                                                               |
| 45 Bone Fracture Reported (yes/no)           |                                                                               |
| 46 Amputation Reported (yes/no)              |                                                                               |
| 47 AKI: Outcomes in Intervention 1(n/N)      | 48 This was captured for each individual intervention and<br>49 control group |
| 50 AKI: Outcomes in Comparison 1 (n/N)       |                                                                               |
| 51 UTI: Outcomes in Intervention 1(n/N)      |                                                                               |

|    |                                      |
|----|--------------------------------------|
| 1  |                                      |
| 2  |                                      |
| 3  |                                      |
| 4  | UTI: Outcomes in Comparison 1 (n/N)  |
| 5  | DKA: Outcomes in Intervention 1(n/N) |
| 6  | DKA: Outcomes in Comparison 1 (n/N)  |
| 7  | BF: Outcomes in Intervention 1(n/N)  |
| 8  | BF: Outcomes in Comparison 1 (n/N)   |
| 9  |                                      |
| 10 | Amp: Outcomes in Intervention 1(n/N) |
| 11 | Amp: Outcomes in Comparison 1 (n/N)  |
| 12 |                                      |
| 13 |                                      |
| 14 |                                      |
| 15 |                                      |
| 16 |                                      |
| 17 |                                      |
| 18 |                                      |
| 19 |                                      |
| 20 |                                      |
| 21 |                                      |
| 22 |                                      |
| 23 |                                      |
| 24 |                                      |
| 25 |                                      |
| 26 |                                      |
| 27 |                                      |
| 28 |                                      |
| 29 |                                      |
| 30 |                                      |
| 31 |                                      |
| 32 |                                      |
| 33 |                                      |
| 34 |                                      |
| 35 |                                      |
| 36 |                                      |
| 37 |                                      |
| 38 |                                      |
| 39 |                                      |
| 40 |                                      |
| 41 |                                      |
| 42 |                                      |
| 43 |                                      |
| 44 |                                      |
| 45 |                                      |
| 46 |                                      |
| 47 |                                      |
| 48 |                                      |
| 49 |                                      |
| 50 |                                      |
| 51 |                                      |
| 52 |                                      |
| 53 |                                      |
| 54 |                                      |
| 55 |                                      |
| 56 |                                      |
| 57 |                                      |
| 58 |                                      |
| 59 |                                      |
| 60 |                                      |

For peer review only

### Section 3: Study Characteristics

Table 7A: Included Study Characteristics

| NCT#<br>Author and Year       | Country          | Study<br>Duration<br>(weeks) | Total<br>Randomized | Background<br>Therapies                     | Intervention(s)                         | Comparator(s)                 | Outcomes<br>Reported |
|-------------------------------|------------------|------------------------------|---------------------|---------------------------------------------|-----------------------------------------|-------------------------------|----------------------|
| NCT01059825<br>Amin, 2015     | International    | 12                           | 328                 | Prior therapy<br>stabilized to<br>metformin | Ertugliflozin<br>1mg, 5 mg, 10mg , 25mg | Placebo, Sitagliptin<br>100mg | UTI                  |
| NCT01059825<br>Amin, 2015     | International    | 4                            | 194                 | Uncontrolled on 2<br>agents                 | Ertugliflozin<br>1mg, 5mg, 25mg         | Placebo                       | UTI                  |
| NCT02157298<br>Araki, 2016    | Japan            | 16                           | 182                 | Prior insulin<br>therapy DPP4<br>allowed    | Dapagliflozin<br>5 mg                   | Placebo                       | UTI, BF              |
| NCT01368081<br>Araki          | Japan            | 52                           | 1160                | Prior SU                                    | Empagliflozin<br>10mg, 25mg             | Metformin 50-<br>2250mg/day   | UTI, BF              |
| NCT00528879<br>Bailey, 2013   | International    | 102                          | 546                 | Prior metformin                             | Dapagliflozin<br>2.5mg, 5mg, 10mg       | Placebo                       | UTI, AKI, BF         |
| None<br>Bailey, 2012          | International    | 24                           | 282                 | Treatment Naive                             | Dapagliflozin<br>1mg, 2.5mg, 5mg        | Placebo                       | UTI, AKI, BF         |
| NCT01164501<br>Barnett, 2014  | International    | 52                           | 741                 | Any prior<br>therapies                      | Empagliflozin<br>10mg, 25mg             | Placebo                       | UTI, DKA, BF         |
| NCT01106651<br>Bode, 2015     | International    | 104                          | 716                 | Prior Naive mono<br>or combo therapy        | Canagliflozin<br>100mg, 300mg           | Placebo                       | UTI, DKA, BF         |
| NCT00855166<br>Bolinder, 2014 | European         | 102                          | 182                 | Prior metformin                             | Dapagliflozin<br>10mg                   | Placebo                       | UTI, BF              |
| NCT01031680<br>Cefalu, 2015   | International    | 52                           | 922                 | Any prior<br>therapies                      | Dapagliflozin<br>10mg                   | Placebo                       | UTI, AKI, BF         |
| NCT01505426<br>Lu, 2016       | Korea and Taiwan | 24                           | 171                 | Prior metformin                             | Ipragliflozin<br>50mg                   | Placebo                       | UTI, BF              |
| NCT01422876<br>DeFronzo, 2015 | International    | 52                           | 686                 | Prior metformin                             | Empagliflozin<br>10mg, 25mg             | Linagliptin 5mg               | UTI                  |
| NCT00660907<br>Prato, 2015    | International    | 208                          | 816                 | Prior metformin                             | Dapagliflozin<br>(mixed dose)           | Glipizide (mixed<br>doses)    | UTI, BF              |

|                                 |                                                 |        |      |                                      |                                                  |                             |               |
|---------------------------------|-------------------------------------------------|--------|------|--------------------------------------|--------------------------------------------------|-----------------------------|---------------|
| NCT00881530<br>Ferrannini, 2013 | International                                   | 78     | 271  | Treatment Naive                      | Empagliflozin<br>10mg, 25mg                      | Metformin 2000mg<br>max     | UTI, BF       |
| NCT00881530<br>Ferrannini, 2013 | International                                   | 78     | 388  | Prior metformin                      | Empagliflozin<br>10mg, 25mg                      | Sitagliptin 100mg           | UTI, BF       |
| NCT00528372<br>Ferrannini, 2010 | International                                   | 24     | 485  | Treatment Naive                      | Dapagliflozin<br>2.5mg, 5mg, 10mg                | Placebo                     | UTI           |
| NCT01071850<br>Fonseca, 2013    | India, Philippines,<br>Columbia, Mexico,<br>USA | 12-    | 412  | Treatment Naive                      | Ipragliflozin<br>12.5mg, 50mg, 150mg,<br>300mg   | Placebo, Metormin<br>1500mg | UTI           |
| NCT02229396<br>Frias, 2016      | International                                   | 28     | 695  | Prior metformin                      | Dapagliflozin<br>10mg                            | Exenatide 2mg               | UTI, AKI, DKA |
| NCT01719003<br>Hadjadj, 2016    | International                                   | 24     | 1364 | Treatment Naive                      | Empagliflozin<br>10mg, 25mg                      | Metformin 1000mg,<br>2000mg | UTI, DKA, BF  |
| NCT01289990<br>Haering, 2015    | International                                   | 76     | 666  | Prior Metformin<br>and SU            | Empagliflozin<br>10mg, 25mg                      | Placebo                     | UTI           |
| None<br>Heise, 2013             | Germany                                         | 4      | 78   | Not described                        | Empagliflozin<br>10mg, 25mg, 100mg               | Placebo                     | UTI           |
| None<br>Heise, 2013             | Germany                                         | 9 days | 48   | Prior Naive mono<br>or combo therapy | Empagliflozin<br>2.5mg, 10mg, 25mg,<br>100mg     | Placebo                     | UTI           |
| NCT00643851<br>Henry, 2012      | International                                   | 24     | 603  | Treatment Naive                      | Dapagliflozin<br>5mg                             | Placebo                     | UTI, BF       |
| NCT00643851<br>Henry, 2012      | International                                   | 24     | 603  | Treatment Naive                      | Dapagliflozin<br>5mg                             | Metformin (mixed<br>doses)  | UTI, BF       |
| NCT00859898<br>Henry, 2012      | International                                   | 24     | 641  | Treatment Naive                      | Dapagliflozin<br>10mg                            | Placebo                     | UTI, BF       |
| NCT00859898<br>Henry, 2012      | International                                   | 24     | 641  | Treatment Naive                      | Dapagliflozin<br>10mg                            | Metformin (mixed<br>doses)  | UTI, BF       |
| NCT00800176<br>Ikeda; 2015      | International                                   | 12     | 398  | Naive or<br>metformin                | Tofogliflozin<br>2.5mg, 5mg, 10mg,<br>20mg, 40mg | Placebo                     | UTI, DKA      |
| NCT02220920<br>Inagaki, 2016    | Japan                                           | 16     | 146  | Prior insulin<br>therapy             | Canagliflozin<br>100mg                           | Placebo                     | UTI, DKA, BF  |
| NCT01387737<br>Inagaki, 2015    | Japan                                           | 52     | 1299 | Any prior<br>therapies<br>washed-out | Canagliflozin<br>100mg, 200mg                    | No comparator               | UTI, DKA, BF  |



|                                |               |    |     |                                                    |                                               |               |         |
|--------------------------------|---------------|----|-----|----------------------------------------------------|-----------------------------------------------|---------------|---------|
| NCT01022112<br>Inagaki, 2013   | Japan         | 12 | 383 | Any prior<br>therapies<br>washed-out               | Canagliflozin<br>50mg, 100mg, 200mg,<br>300mg | Placebo       | UTI, BF |
| NCT01413204<br>Inagaki, 2014   | Japan         | 24 | 272 | Any prior<br>therapies<br>washed-out               | Canagliflozin<br>100mg, 200mg                 | Placebo       | UTI, BF |
| NCT02175784<br>Ishihara, 2016  | Japan         | 16 | 262 | Prior insulin<br>others allowed                    | Ipragliflozin<br>50mg                         | Placebo       | UTI     |
| NCT00984867<br>Jabbour, 2013   | International | 48 | 451 | Prior DPP4 maybe<br>metformin no<br>others         | Dapagliflozin<br>10mg                         | Placebo       | UTI, BF |
| NCT01381900<br>Ji, 2015        | International | 18 | 678 | Prior Metformin<br>and maybe SU                    | Canagliflozin<br>100mg, 300mg                 | Placebo       | UTI, BF |
| NCT01095653<br>Ji, 2014        | Asia          | 24 | 393 | Treatment Naive                                    | Dapagliflozin<br>5mg, 10mg                    | Placebo       | UTI, BF |
| NCT01023945<br>Kadokura, 2014  | Japan         | 2  | 30  | Treatment Naive<br>or monotherapy                  | Ipragliflozin<br>50mg, 100mg                  | Placebo       | UTI     |
| NCT01193218<br>Kadowaki, 2015  | Japan         | 52 | 547 | Treatment Naive<br>or monotherapy                  | Empagliflozin<br>10mg, 25mg                   | No comparator | UTI, BF |
| NCT00972244<br>Kaku, 2013      | Japan         | 12 | 279 | Treatment Naive<br>or 1 or 2 agents at<br>low dose | Dapagliflozin<br>1mg, 2.5mg, 5mg, 10mg        | Placebo       | UTI, BF |
| None<br>Kaku, 2014             | Japan         | 24 | 261 | Treatment Naive<br>or monotherapy                  | Dapagliflozin<br>5mg, 10mg                    | Placebo       | UTI, BF |
| None<br>Kaku, 2014             | Japan         | 24 | 235 | Treatment Naive<br>or washout                      | Tofogliflozin<br>10mg, 20mg, 40mg             | Placebo       | UTI, BF |
| NCT01242215<br>Kashiwagi, 2015 | Japan         | 52 | 245 | Prior SU                                           | Ipragliflozin<br>50mg                         | Placebo       | UTI     |
| NCT01057628<br>Kashiwagi, 2015 | Japan         | 26 | 131 | Treatment Naive<br>or 1 or 2 agents at<br>low dose | Ipragliflozin<br>50mg                         | Placebo       | UTI     |
| NCT00621868<br>Kashiwagi, 2014 | Japan         | 12 | 361 | Treatment Naive<br>or washout                      | Ipragliflozin<br>12.5mg, 25mg, 50mg,<br>100mg | Placebo       | UTI     |
| NCT01316094<br>Kashiwagi, 2015 | Japan         | 52 | 165 | Treatment Naive<br>or 1 or 2 agents at<br>low dose | Ipragliflozin<br>50mg                         | Placebo       | UTI     |

|                                          |               |     |      |                                                   |                                                      |                                  |              |
|------------------------------------------|---------------|-----|------|---------------------------------------------------|------------------------------------------------------|----------------------------------|--------------|
| NCT00663260<br>Kohan, 2014               | International | 104 | 252  | Not described                                     | Dapagliflozin<br>5mg, 10mg                           | Placebo                          | UTI, AKI, BF |
| NCT01210001<br>Kovacs, 2015              | International | 76  | 499  | Prior pioglitazone<br>and maybe<br>metformin      | Empagliflozin<br>10mg, 25mg                          | Placebo                          | UTI, BF      |
| NCT00976495<br>Heerspink, 2013           | International | 12  | 75   | Prior Metformin<br>and maybe SU                   | Dapagliflozin<br>10mg                                | Placebo                          | UTI          |
| NCT01106677<br>Lavalle-Gonzalez,<br>2013 | International | 52  | 1284 | Prior Metformin<br>and maybe SU<br>but washed-out | Canagliflozin<br>100mg, 300mg                        | Sitagliptin 100mg                | UTI, DKA, BF |
| NCT01042977<br>Leiter, 2014              | International | 52  | 964  | Any prior<br>therapies                            | Dapagliflozin<br>10mg                                | Placebo                          | UTI, AKI, BF |
| NCT00968812<br>Leiter, 2015              | International | 104 | 1450 | Prior metformin                                   | Canagliflozin<br>100mg, 300mg                        | Glimepiride 8mg                  | UTI, BF      |
| NCT01422876<br>Lewin, 2015               | International | 52  | 677  | Treatment Naive                                   | Empagliflozin<br>10mg, 25mg                          | Linagliptin 5mg                  | UTI          |
| NCT00263276<br>List, 2008                | International | 12  | 389  | Treatment Naive                                   | Dapagliflozin<br>2.5mg, 5mg, 10mg,<br>20mg, 50mg     | Placebo, Metformin<br>1500mg max | UTI          |
| NCT01646320<br>Mathieu, 2015             | International | 52  | 320  | Prior metformin<br>and DPP4                       | Dapagliflozin<br>10mg                                | Placebo                          | UTI, BF      |
| NCT01392677<br>Matthaei, 2015            | International | 52  | 219  | Prior Metformin<br>and SU                         | Dapagliflozin<br>10mg                                | Placebo                          | UTI          |
| None<br>Mudaliar, 2013                   | International | 12  | 44   | Prior Metformin<br>and maybe SU                   | Dapagliflozin<br>5mg                                 | Placebo                          | UTI          |
| NCT01947855<br>Nishimura, 2015           | Japan         | 4   | 60   | Treatment or<br>monotherapy                       | Empagliflozin<br>10mg, 25mg                          | Placebo                          | UTI, DKA     |
| NCT01340664<br>Qiu, 2014                 | International | 18  | 279  | Prior metformin                                   | Canagliflozin<br>100mg, 300mg                        | Placebo                          | UTI          |
| NCT01989754<br>Rodbard, 2016             | International | 26  | 218  | Prior metformin<br>and DPP4                       | Canagliflozin<br>300mg                               | Placebo                          | UTI, DKA, BF |
| NCT01289990<br>Roden, 2015               | International | 76  | 899  | Treatment Naive                                   | Empagliflozin<br>10mg, 25mg                          | Placebo, Sitagliptin<br>100mg    | UTI, DKA     |
| NCT00642278<br>Rosenstock, 2012          | International | 12  | 451  | Prior metformin                                   | Canagliflozin<br>50mg, 100mg, 200mg,<br>300mg, 600mg | Placebo, Sitagliptin<br>100mg    | UTI          |
| NCT01376557                              | United States | 12  | 299  | Prior metformin                                   | Sotagliflozin                                        | placebo                          | UTI, BF      |

|                                        |               |        |      |                                                     |                                                         |                               |              |
|----------------------------------------|---------------|--------|------|-----------------------------------------------------|---------------------------------------------------------|-------------------------------|--------------|
| Rosenstock, 2015                       |               |        |      |                                                     | 75 mg, 200mg, 400mg                                     |                               |              |
| NCT01809327<br>Rosenstock, 2016        | International | 26     | 1186 | Treatment Naive                                     | Canagliflozin<br>100mg, 300mg                           | Metformin 500mg               | UTI, DKA     |
| NCT01606007<br>Rosenstock, 2015        | International | 24     | 534  | Prior metformin                                     | Dapagliflozin<br>10mg                                   | Placebo                       | UTI, BF      |
| NCT01306214<br>Rosenstock, 2014        | International | 52     | 563  | Prior insulin<br>therapy                            | Empagliflozin<br>10mg, 25mg                             | Placebo                       | UTI, DKA, BF |
| NCT01011868<br>Rosenstock, 2015        | International | 78     | 494  | Prior insulin<br>maybe metformin<br>and SU          | Empagliflozin<br>10mg, 25mg                             | Placebo                       | UTI, DKA     |
| NCT00683878<br>Rosenstock, 2012        | International | 48     | 420  | Treatment Naive<br>or stabilized on<br>pioglitazine | Dapagliflozin<br>5mg, 10mg                              | Placebo                       | UTI, BF      |
| None<br>Ross, 2015                     | International | 16     | 983  | Prior metformin                                     | Empagliflozin<br>10mg, 25mg                             | Placebo                       | UTI          |
| None<br>Sasaki, 2015                   | Japan         | 7 days | 40   | Treatment Naive                                     | Luseogliflozin<br>0.5mg, 1mg, 2.5mg, 5mg                | Placebo                       | UTI          |
| NCT01137812<br>Scherthner, 2013        | International | 52     | 756  | Prior Metformin<br>and SU                           | Canagliflozin<br>300mg                                  | Sitagliptin 100mg             | UTI, BF      |
| NCT01217892<br>Schumm-Draeger,<br>2014 | International | 16     | 400  | Prior metformin                                     | Dapagliflozin<br>5mg, 10mg, 20mg                        | Placebo                       | UTI, BF      |
| None<br>Seino, 2014                    | Japan         | 12     | 239  | Treatment Naive                                     | Luseogliflozin<br>0.5mg, 2.5mg, 5mg                     | Placebo                       | UTI          |
| None<br>Seino, 2014                    | Japan         | 12     | 282  | Treatment Naive                                     | Luseogliflozin<br>1mg, 2.5mg, 5mg, 10mg                 | Placebo                       | UTI, DKA     |
| None<br>Seino, 2014                    | Japan         | 24     | 158  | Treatment Naive                                     | Luseogliflozin<br>2.5mg                                 | Placebo                       | UTI          |
| NCT01081834<br>Stenlof, 2013           | International | 26     | 587  | Treatment Naive<br>or washout                       | Canagliflozin<br>100mg, 300mg                           | Placebo                       | UTI, BF      |
| NCT00680745<br>Strojek, 2014           | International | 48     | 597  | Prior SU                                            | Dapagliflozin<br>2.5mg, 5mg, 10mg                       | Placebo                       | UTI, BF      |
| NCT00500331<br>Sykes, 2015             | international | 12     | 336  | Treatment Naive                                     | Remogliflozin<br>100mg, 200mg, 500mg,<br>1000mg, 2000mg | Placebo, Pioglitazone<br>30mg | UTI          |
| NCT01370005<br>Tikkanen, 2015          | International | 12     | 825  | Treatment Naive                                     | Empagliflozin<br>10mg, 25mg                             | Placebo                       | UTI, DKA, BF |

|                                               |               |        |      |                                 |                                                |                                    |                      |
|-----------------------------------------------|---------------|--------|------|---------------------------------|------------------------------------------------|------------------------------------|----------------------|
| None<br>Townsend, 2016                        | United States | 6      | 171  | Uncontrolled on<br>1-3 agents   | Canagliflozin<br>100mg, 300mg                  | Placebo                            | UTI                  |
| None<br>Seman, 2016                           | Malaysia      | 12     | 110  | Prior Metformin<br>and SU       | Dapagliflozin<br>10mg                          | Sulphonylureas<br>(various agents) | UTI                  |
| NCT01137474<br>Weber, 2016                    | International | 12     | 944  | Any prior<br>therapies          | Dapagliflozin<br>10mg                          | Placebo                            | UTI, BF              |
| NCT01195662<br>Weber, 2016                    | International | 12     | 449  | Any prior<br>therapies          | Dapagliflozin<br>10mg                          | Placebo                            | UTI, BF              |
| NCT01106625<br>Wilding; 2013                  | International | 52     | 469  | Prior Metformin<br>and SU       | Canagliflozin<br>100mg, 300mg                  | Placebo                            | UTI, DKA, BF         |
| NCT01117584<br>Wilding, 2013                  | International | 12     | 343  | Prior metformin                 | Ipragliflozin<br>12.5mg, 50mg, 150mg,<br>300mg | Placebo                            | UTI                  |
| NCT00357370<br>Wilding, 2009                  | International | 12     | 71   | Any prior<br>therapies          | Dapagliflozin<br>10mg, 20mg                    | Placebo                            | UTI                  |
| NCT00673231<br>Wilding, 2014                  | international | 104    | 808  | Prior insulin<br>others allowed | Dapagliflozin<br>2.5mg, 5/10mg, 10mg           | Placebo                            | UTI, BF              |
| NCT01064414<br>Yale, 2014                     | International | 52     | 269  | Treatment Naive<br>or 1 or 2    | Canagliflozin<br>100mg, 300mg                  | Placebo                            | UTI, BF              |
| NCT01316341<br>Zhao, 2015                     | China         | 9 days | 24   | Treatment Naive<br>or 1 or 2    | Empagliflozin<br>10mg, 25mg                    | Placebo                            | UTI                  |
| NCT01131676<br>Zinman, 2015                   | International | 206    | 7028 | Treatment Naive                 | Empagliflozin<br>10mg, 25mg                    | Placebo                            | UTI, AKI, DKA,<br>BF |
| None<br>Goto, 2012                            |               | 24     | 168  | Prior metformin                 | Ipragliflozin<br>50mg                          | Placebo                            | UTI                  |
| NCT02036515<br>Dagogo-Jack, 2017              | International | 26     | 463  | Prior metformin<br>and DPP4     | Ertugliflozin<br>5mg, 15mg                     | Placebo                            | UTI, DKA, BF         |
| NCT01734785<br>Maldonado-<br>Lutomirsky, 2016 | International | 24     | 606  | Prior metformin<br>and DPP4     | Empagliflozin<br>10mg, 25mg                    | Placebo                            | UTI, AKI, BF         |
| NCT01289990<br>Merker, 2015                   | International | 52     | 637  | Prior metformin                 | Empagliflozin<br>10mg, 25mg                    | Placebo                            | UTI                  |
| NCT01032629<br>Neal, 2015                     | International | 52     | 2074 | Prior insulin<br>therapy        | Canagliflozin<br>100mg, 300mg                  | Placebo                            | UTI, BF              |
| NCT01167881<br>Ridderstrale, 2014             | International | 104    | 1549 | Prior metformin                 | Empagliflozin<br>25mg                          | Glimepiride 1-4mg                  | UTI, AKI, BF         |

|                                  |               |    |      |                                                                      |                                                 |                               |                      |
|----------------------------------|---------------|----|------|----------------------------------------------------------------------|-------------------------------------------------|-------------------------------|----------------------|
| NCT00495469<br>Sykes, 2014       | UK            | 12 | 252  | Treatment Naive                                                      | Remogliflozin<br>100mg, 250mg, 500mg,<br>1000mg | Placebo, Pioglitazone<br>30mg | UTI, BF              |
| None<br>Tanizawa, 2014           | Japan         | 52 | 194  | Treatment Naive                                                      | Tofogliflozin<br>20mg, 40mg                     | No comparator                 | UTI                  |
| None<br>Tanizawa, 2014           | Japan         | 52 | 602  | Any prior<br>therapies                                               | Tofogliflozin<br>20mg, 40mg                     | No comparator                 | UTI                  |
| NCT01095666<br>Yang, 2014        |               | 24 | 444  | Prior metformin                                                      | Dapagliflozin<br>5mg, 10mg                      | Placebo                       | UTI, BF              |
| None<br>Gupta, 2017              |               | 76 | 108  | Treatment Naive                                                      | Empagliflozin<br>10mg, 25mg                     | Placebo, Sitagliptin<br>100mg | UTI                  |
| NCT02354235<br>Kadowaki, 2017    | Japan         | 24 | 138  | Prior Teneagliptin                                                   | Canagliflozin<br>100mg                          | Placebo                       | UTI, DKA, BF         |
| NCT01734785<br>Softeland, 2017   | International | 24 | 333  | Prior metformin                                                      | Empagliflozin<br>10mg, 25mg                     | Placebo                       | UTI, AKI, DKA,<br>BF |
| NCT01958671<br>Terra, 2017       | International | 26 | 461  | Treatment Naive                                                      | Ertugliflozin<br>5mg, 15mg                      | Placebo                       | UTI                  |
| NCT 01022112<br>Not Published    |               | 12 | 383  | Treatment Naive                                                      | Canagliflozin<br>50mg, 100mg, 200mg,<br>300mg   | Placebo                       | BF                   |
| NCT02201004<br>Terauchi, 2017    |               | 16 | 211  | Prior insulin<br>therapy DPP4<br>allowed                             | Tofogliflozin<br>20mg, 40mg                     | Placebo                       | UTI                  |
| NCT01986855,<br>Grunberger, 2018 | International | 52 | 468  | Prior therapies<br>(NOT metformin,<br>pioglitazone)                  | Ertugliflozin<br>5mg, 15mg                      | Placebo                       | UTI, BF              |
| NCT01999218,<br>Hollander, 2018  | International | 52 | 1326 | Prior metformin                                                      | Ertugliflozin<br>5mg, 15mg                      | Glimepiride                   | AKI, UTI, KA,<br>BF  |
| Ito, 2017                        | Japan         | 24 | 66   | Treatment Naive<br>or prior therapy<br>(NOT glitizone or<br>insulin) | Ipragliflozin<br>50mg                           | Pioglitazone 15-30mg          | UTI, KA              |
| NCT02099110,<br>Pratley, 2017    | International | 52 | 1233 | Prior metformin                                                      | Ertugliflozin<br>5mg, 15mg                      | Sitagliptin 100 mg            | UTI, KA, BF          |
| NCT02033889,<br>Rosenstock, 2017 | International | 26 | 621  | Prior metformin                                                      | Ertugliflozin<br>5mg, 15mg                      | Placebo                       | UTI, KA, F           |
| Seino, 2018                      | Japan         | 16 | 233  | Prior insulin                                                        | Luseogliflozin                                  | Placebo                       | UTI                  |

|                              |               |     |        |                                            |                         |         |                           |
|------------------------------|---------------|-----|--------|--------------------------------------------|-------------------------|---------|---------------------------|
|                              |               |     |        |                                            | 2.5mg                   |         |                           |
| NCT02096705,<br>Yang, 2018   | Asia          | 24  | 272    | Any prior<br>antidiabetic                  | Dapagliflozin<br>10mg   | Placebo | UTI, KA                   |
| NCT02429258,<br>Henry, 2017  | Unclear       | 4   | 100    | Background<br>metformin                    | Dapagliflozin<br>10mg   | Placebo | UTI                       |
| NCT01606007,<br>Ekholm, 2017 | Unclear       | 24  | 534    | Background<br>metformin and<br>saxagliptin | Dapagliflozin<br>10mg   | Placebo | BF                        |
| Neal, 2017                   | International | 188 | 10,142 | Any background<br>therapy                  | Canagliflozin 100-300mg | Placebo | UTI, AKI, DKA,<br>BF, AMP |

For peer review only

**Section 4: Additional Forest Plots**

Figure 1A: Risk of Acute Kidney Injury with SGLT2 Inhibitors compared to Active Comparators

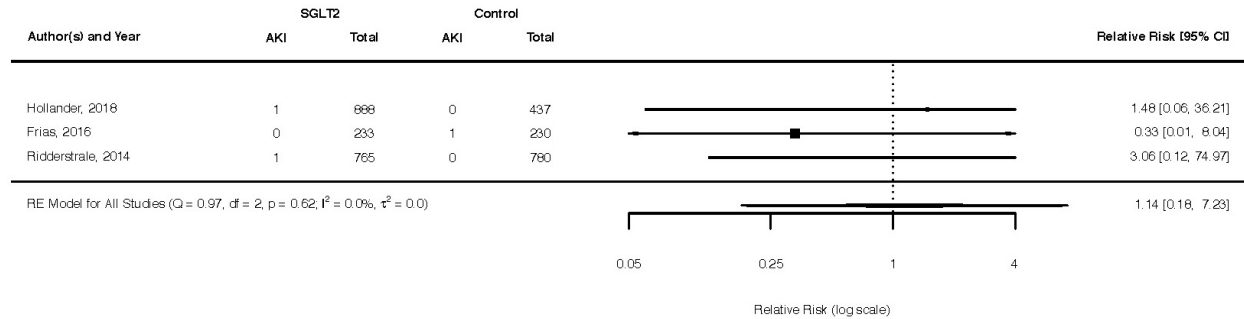

Figure 2A: Risk of Acute Kidney Injury with SGLT2 Inhibitors Compared to Placebo; excluding EMPA-REG.

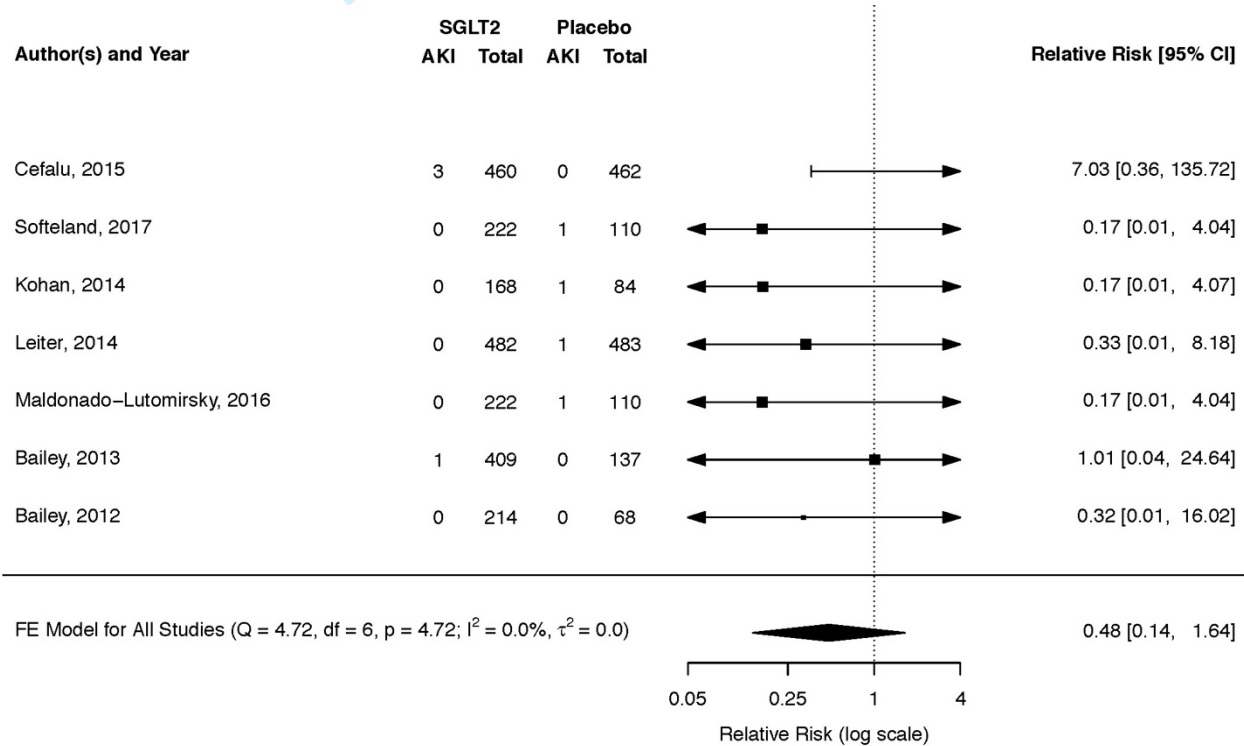



Figure 3A. Risk of Ketoacidosis among users of an SGLT2 Inhibitor compared to an Incretin

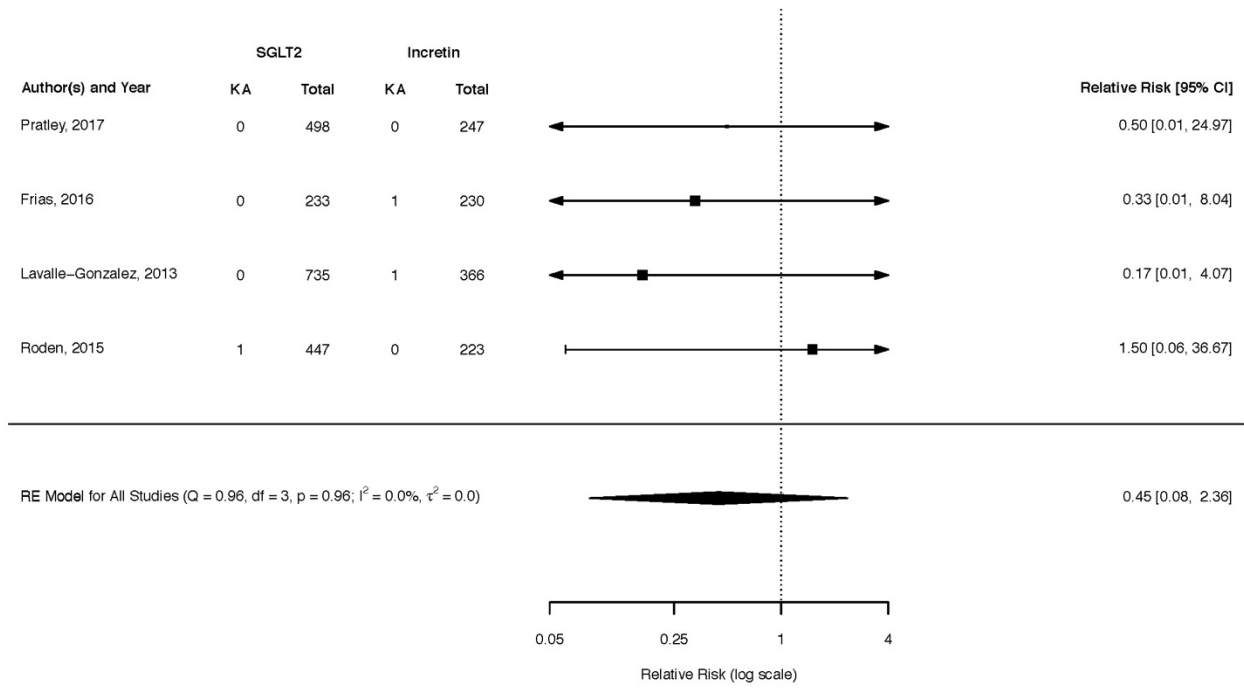

Figure 4A. Risk of Ketoacidosis among users of an SGLT2 Inhibitor Compared to Placebo in Studies with at least one Outcome

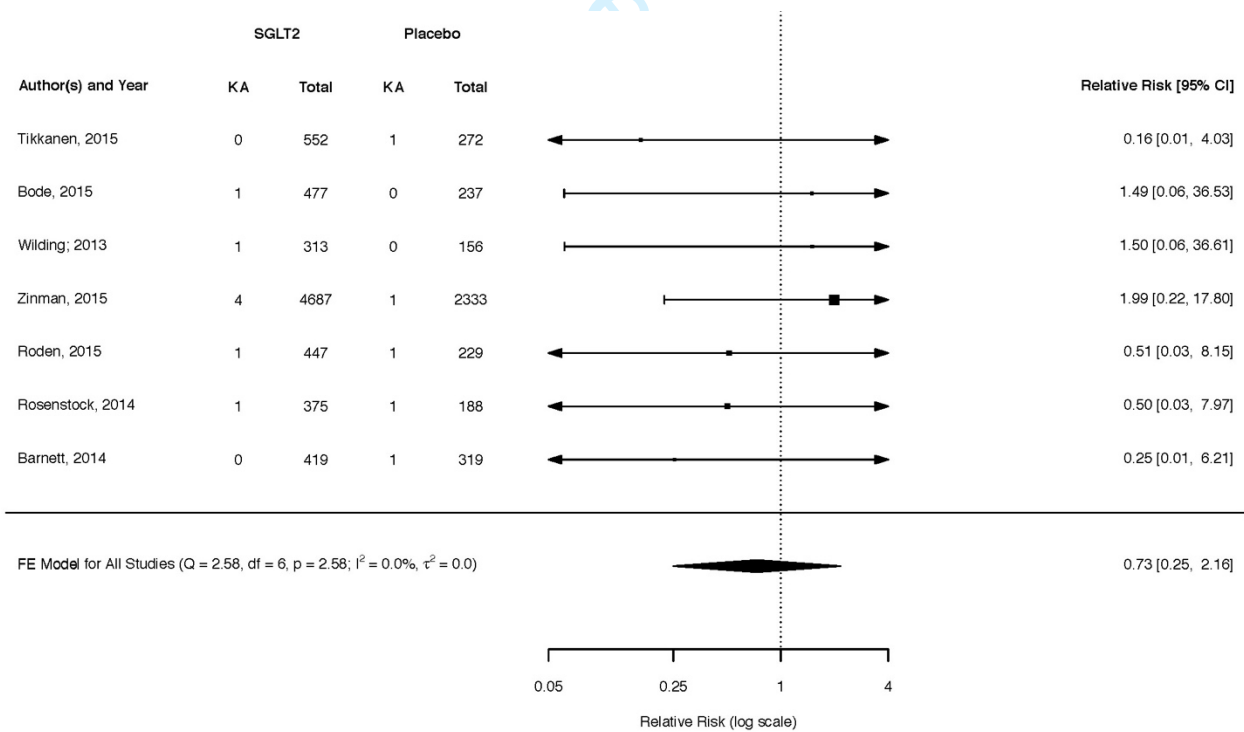

Figure 5A. Risk of Urinary Tract Infections among users of SGLT2 Inhibitors Compared to Active Controls

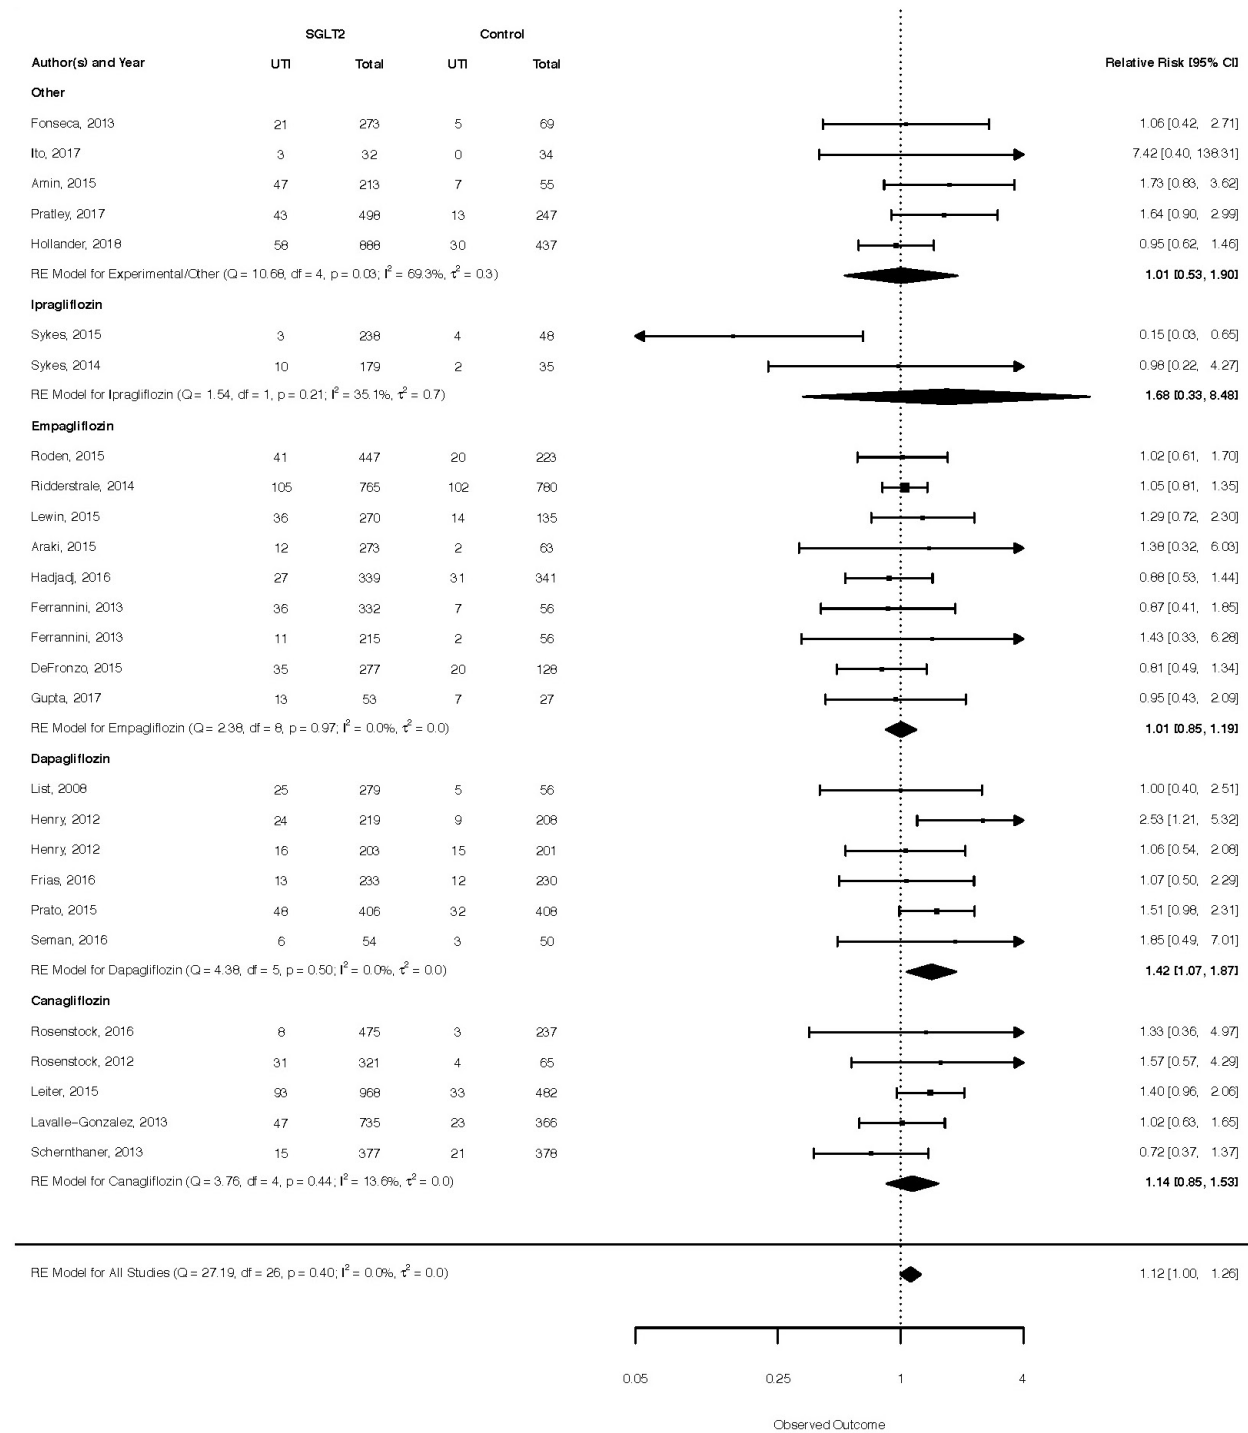

Figure 6A: Risk of Fracture with SGLT2 Inhibitors compared to Metformin

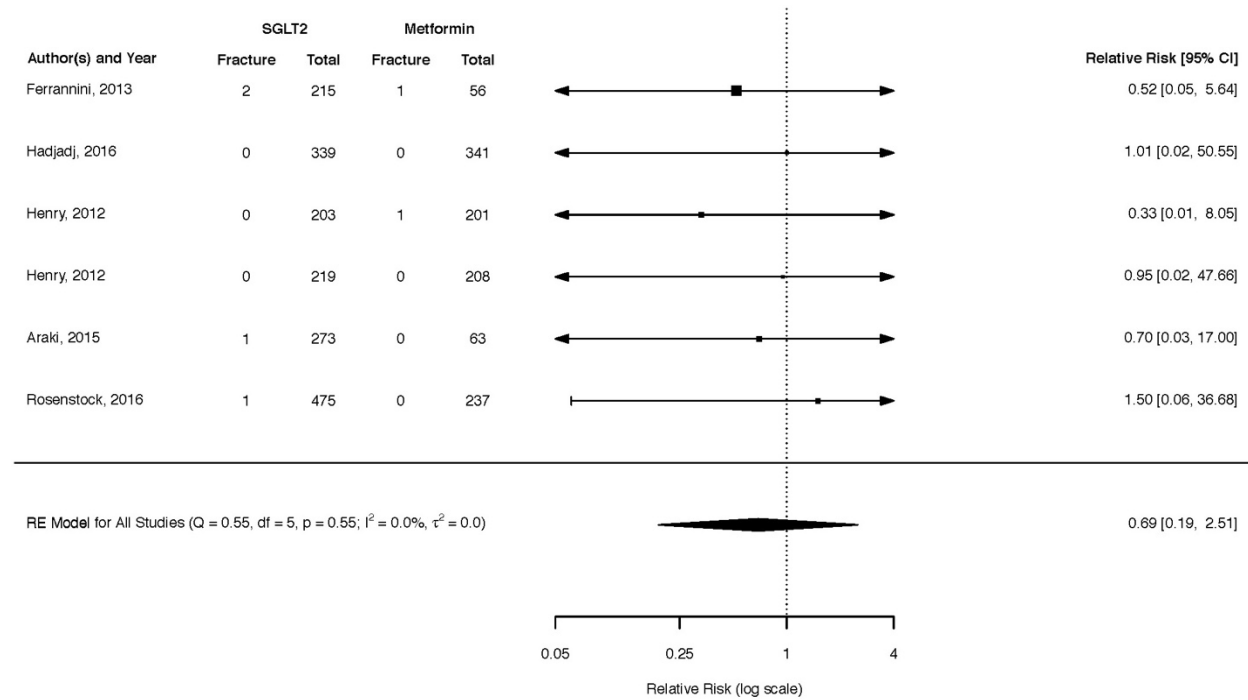

Figure 7A: Risk of Fracture with SGLT2 Inhibitors compared to Sulfonylureas

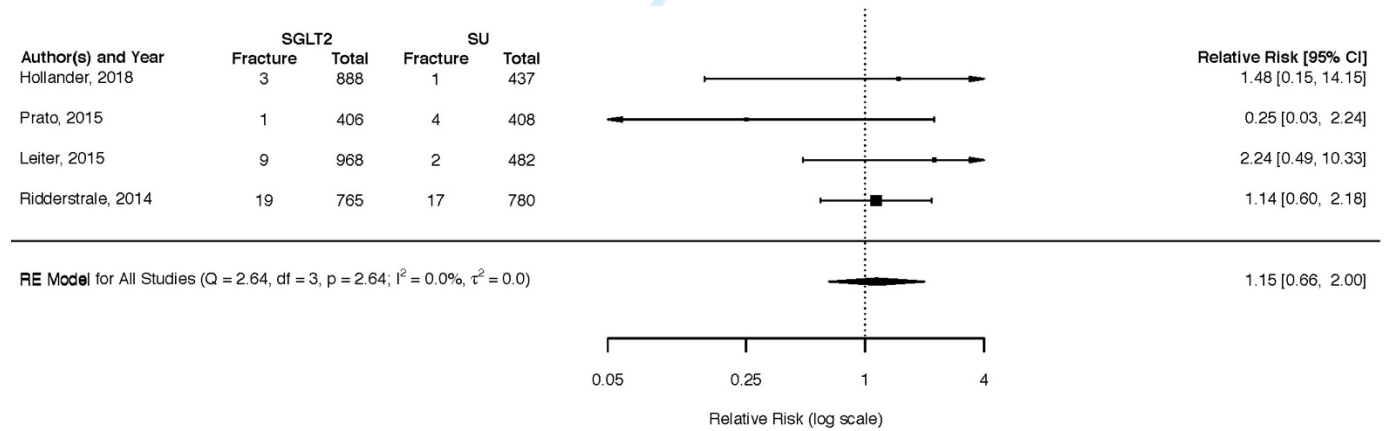

Figure 8A: Risk of Fracture with SGLT2 Inhibitors compared to Incretins

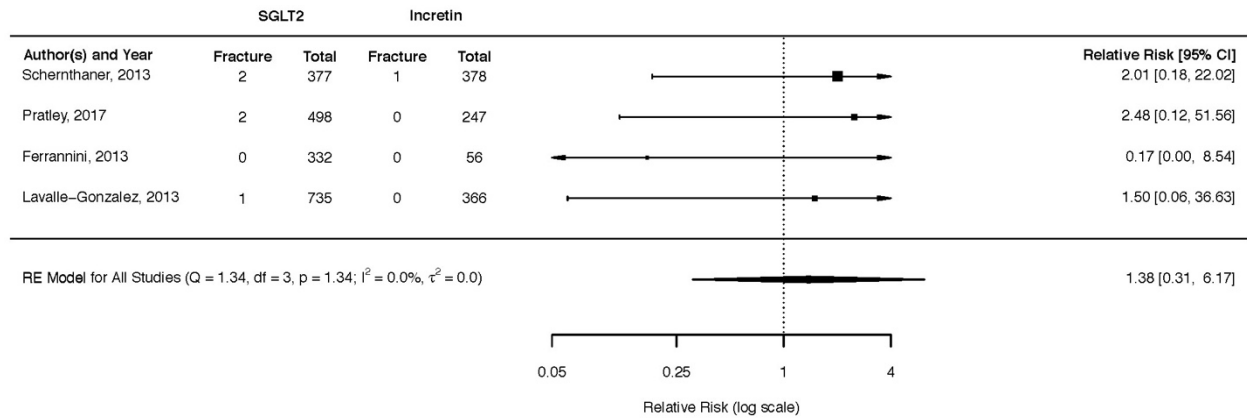

Figure 9A: Risk of Fracture with Canagliflozin compared to Placebo

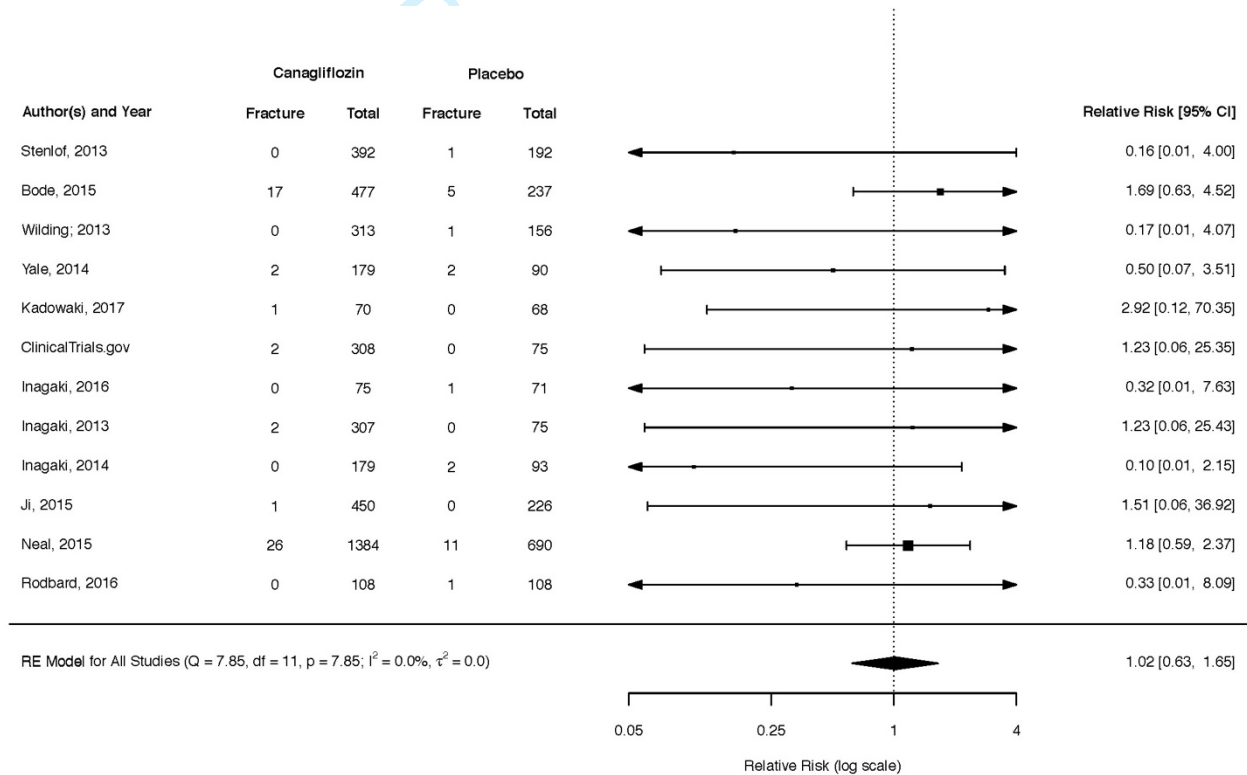

Section 5: Forest Plots for Fixed Effects Analysis

Figure 10A. Risk of Acute Kidney Injury with SGLT2 Inhibitors compared to Placebo - Fixed Effect Model

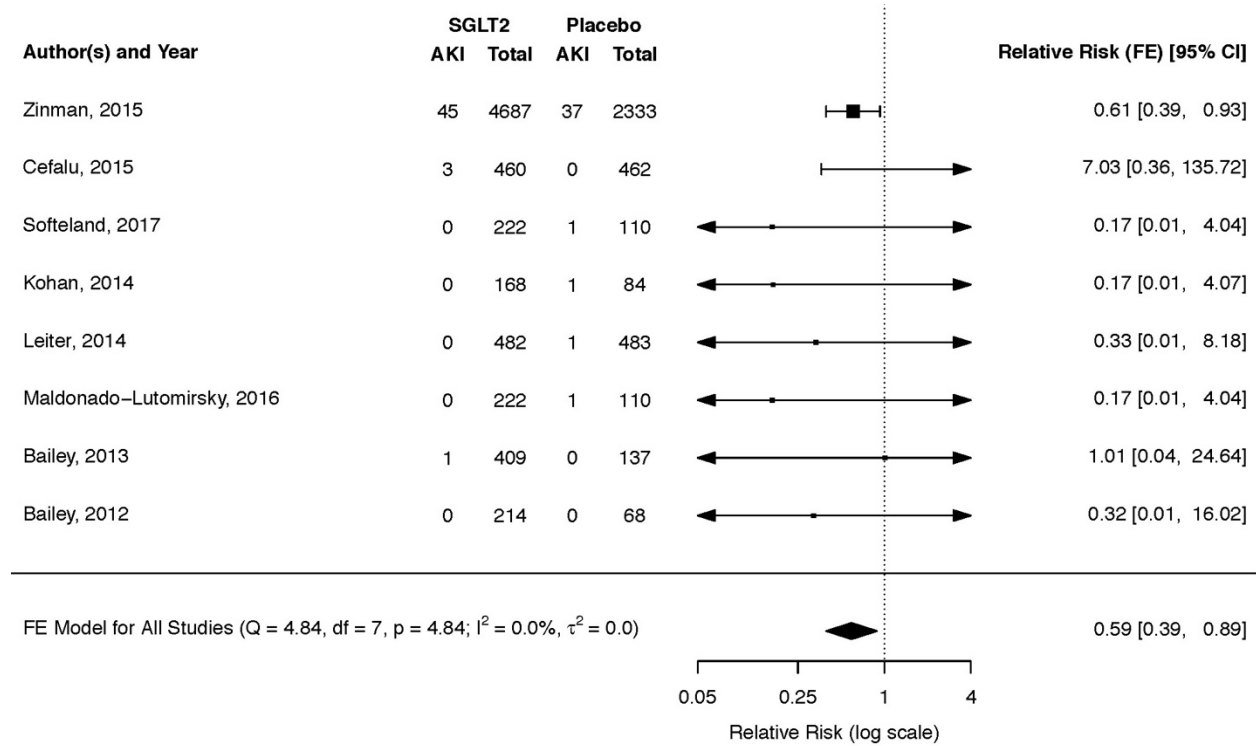

Figure 11A. Risk of Diabetic Ketoacidosis with SGLT2 Inhibitors compared to Placebo - Fixed Effect Model

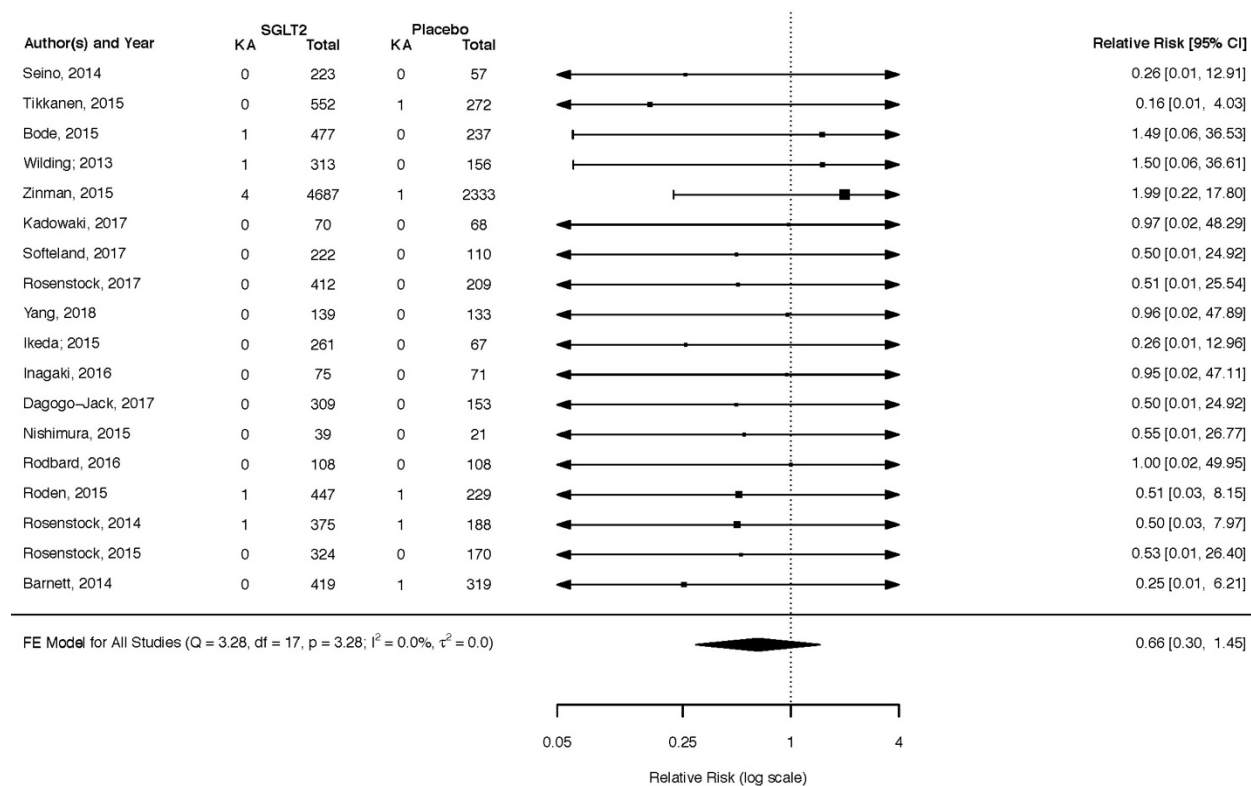

Figure 12A. Risk of Urinary Tract Infection with SGLT2 Inhibitors compared to Placebo - Fixed Effect Model

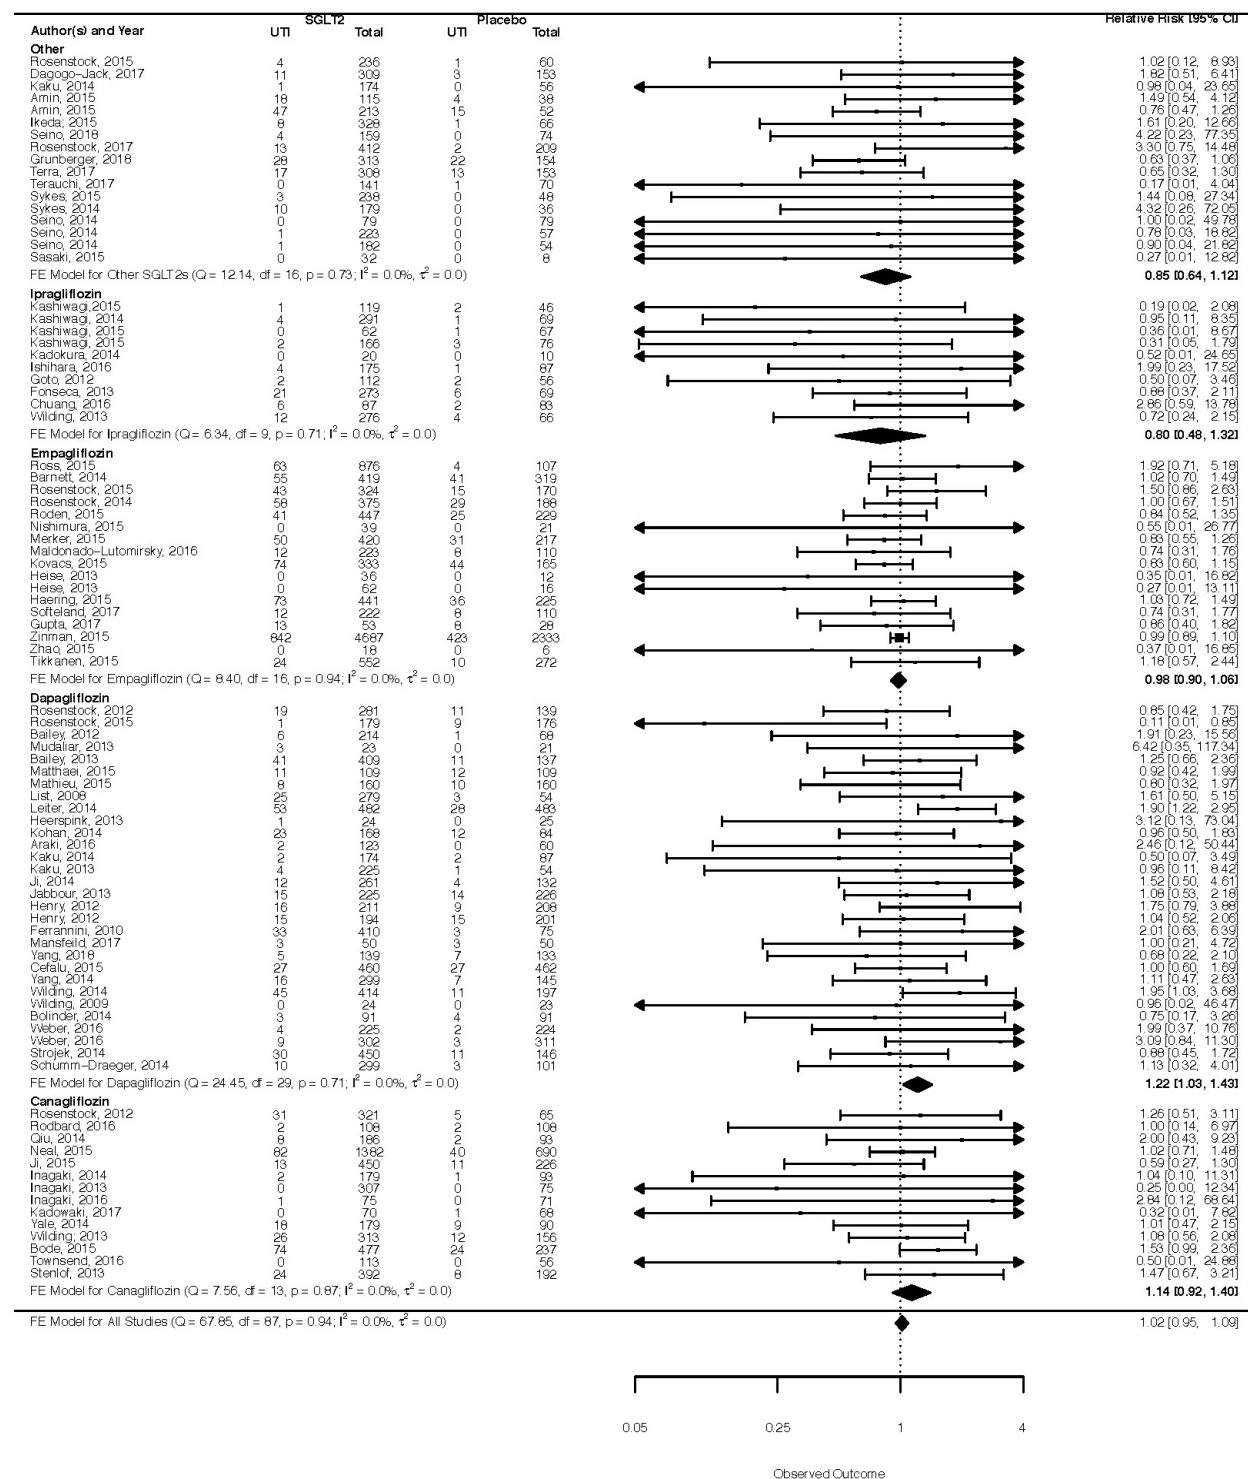



Figure 13A. Risk of Fracture with SGLT2 Inhibitors compared to Placebo - Fixed Effect Model

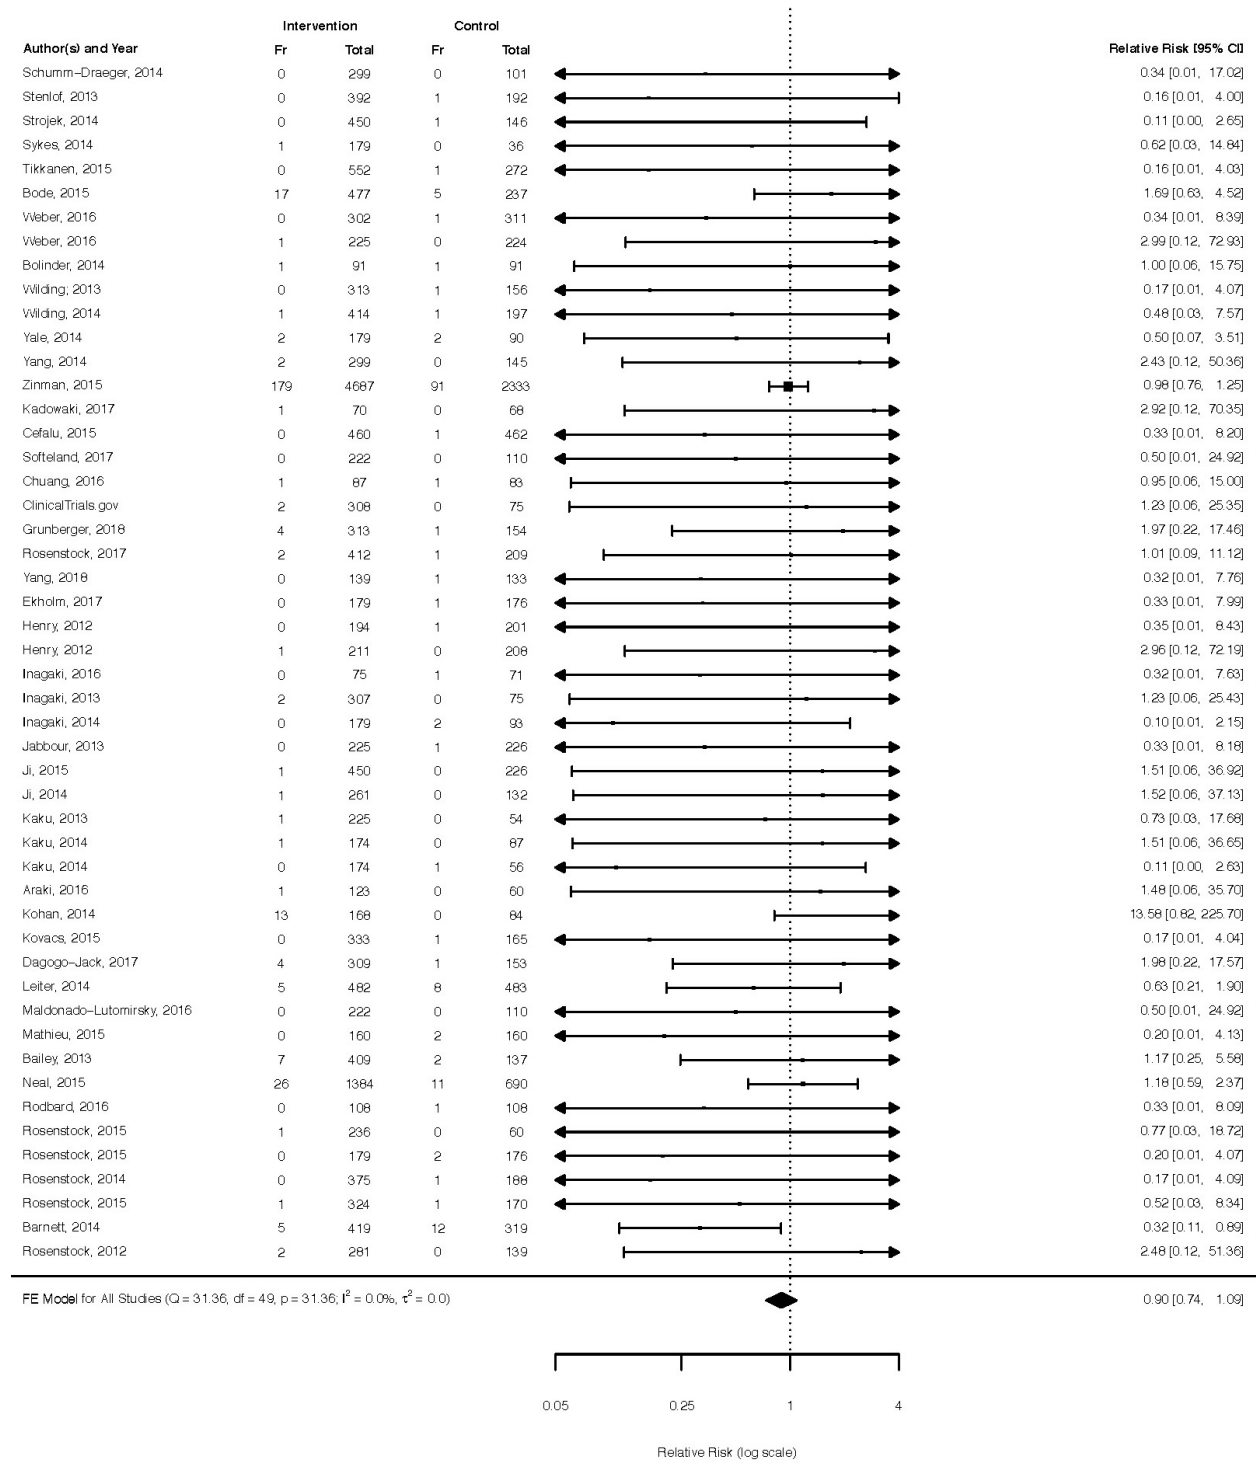

## Section 6: Risk of Bias Assessment

Table 7A. Risk of Bias Assessment for Included Studies

| Author and Year  | NCT#        | Randomization Sequence | Allocation concealment | Double Blinding | Blinded Outcome Assessment | Incomplete Outcome | Selective Reporting | Other        | Overall Assessment |
|------------------|-------------|------------------------|------------------------|-----------------|----------------------------|--------------------|---------------------|--------------|--------------------|
| Amin, 2015       | NCT01059825 | Low Risk               | Low Risk               | Low Risk        | Low Risk                   | Low Risk           | Low Risk            | Low Risk     | low                |
| Amin, 2015       | NCT01059825 | Unclear Risk           | Unclear Risk           | Low Risk        | Unclear Risk               | Low Risk           | Unclear Risk        | Unclear risk | high               |
| Araki, 2016      | NCT02157298 | Unclear Risk           | Low Risk               | Low Risk        | Low Risk                   | Low Risk           | Low Risk            | Unclear risk | low                |
| Araki            | NCT01368081 | Low Risk               | Low Risk               | Medium Risk     | Unclear Risk               | Low Risk           | High Risk           | Unclear risk | high               |
| Bailey, 2013     | NCT00528879 | Low Risk               | Low Risk               | Low Risk        | Low Risk                   | Medium Risk        | Unclear Risk        | Unclear risk | high               |
| Bailey, 2012     | None        | Low Risk               | Low Risk               | Low Risk        | Low Risk                   | Low Risk           | Low Risk            | Low Risk     | low                |
| Barnett, 2014    | NCT01164501 | Low Risk               | Low Risk               | Low Risk        | Low Risk                   | Low Risk           | High Risk           | Unclear risk | high               |
| Bode, 2015       | NCT01106651 | Low Risk               | Low Risk               | Low Risk        | Low Risk                   | Low Risk           | High Risk           | Unclear risk | high               |
| Bolinder, 2014   | NCT00855166 | Low Risk               | Low Risk               | Low Risk        | Low Risk                   | Low Risk           | Low Risk            | Unclear risk | low                |
| Cefalu, 2015     | NCT01031680 | Low Risk               | Low Risk               | Medium Risk     | Low Risk                   | Low Risk           | High Risk           | Low Risk     | high               |
| Chuang, 2016     | NCT01505426 | Low Risk               | Low Risk               | Low Risk        | Low Risk                   | Low Risk           | Low Risk            | Unclear risk | low                |
| DeFronzo, 2015   | NCT01422876 | Low Risk               | Low Risk               | Low Risk        | Unclear Risk               | Low Risk           | Low Risk            | Unclear risk | low                |
| Prato, 2015      | NCT00660907 | Low Risk               | Low Risk               | Low Risk        | Low Risk                   | Low Risk           | High Risk           | Unclear risk | high               |
| Ferrannini, 2013 | NCT00881530 | High Risk              | High Risk              | High Risk       | High Risk                  | Low Risk           | High Risk           | Unclear risk | high               |
| Ferrannini, 2010 | NCT00528372 | Unclear Risk           | Unclear Risk           | Low Risk        | Unclear Risk               | Unclear Risk       | Unclear Risk        | Unclear risk | high               |
| Fonseca, 2013    | NCT01071850 | Unclear Risk           | Low Risk               | Low Risk        | Low Risk                   | Low Risk           | Low Risk            | Unclear risk | low                |
| Frias, 2016      | NCT02229396 | Low Risk               | Low Risk               | Low Risk        | Low Risk                   | Low Risk           | Low Risk            | Unclear risk | low                |
| Hadjadj, 2016    | NCT01719003 | Low Risk               | Low Risk               | Low Risk        | Low Risk                   | Low Risk           | High Risk           | Unclear risk | high               |
| Haering, 2015    | NCT01289990 | Low Risk               | Low Risk               | Low Risk        | Unclear Risk               | Low Risk           | Low Risk            | Unclear risk | low                |
| Heise, 2013      | None        | Low Risk               | Low Risk               | Unclear Risk    | Unclear Risk               | Low Risk           | Unclear Risk        | Unclear risk | high               |
| Heise, 2013      | None        | Unclear Risk           | Low Risk               | Low Risk        | Low Risk                   | Low Risk           | Low Risk            | Unclear risk | low                |
| Henry, 2012      | NCT00643851 | Low Risk               | Low Risk               | Low Risk        | Low Risk                   | Low Risk           | High Risk           | Unclear risk | high               |

1  
2  
3  
4  
5  
6  
7  
8  
9  
10  
11  
12  
13  
14  
15  
16  
17  
18  
19  
20  
21  
22  
23  
24  
25  
26  
27  
28  
29  
30  
31  
32  
33  
34  
35  
36  
37  
38  
39  
40  
41  
42  
43  
44  
45  
46  
47

|                        |              |              |          |             |              |              |              |              |      |
|------------------------|--------------|--------------|----------|-------------|--------------|--------------|--------------|--------------|------|
| Henry, 2012            | NCT00859898  | Low Risk     | Low Risk | Low Risk    | Low Risk     | Low Risk     | High Risk    | Unclear risk | high |
| Ikeda, 2015            | NCT00800176  | Unclear Risk | Low Risk | Low Risk    | Unclear Risk | Low Risk     | Low Risk     | Unclear risk | high |
| Inagaki, 2016          | NCT02220920  | Low Risk     | Low Risk | Low Risk    | low Risk     | Low Risk     | Low Risk     | Unclear risk | low  |
| Inagaki, 2015          | NCT01387737  | Unclear Risk | Low Risk | High Risk   | High Risk    | Medium Risk  | Unclear Risk | Unclear risk | high |
| Inagaki, 2013          | NCT01022112  | Low Risk     | Low Risk | Low Risk    | Low Risk     | Low Risk     | High Risk    | Unclear risk | high |
| Inagaki, 2014          | NCT01413204  | Low Risk     | Low Risk | Low Risk    | Low Risk     | Low Risk     | High Risk    | Unclear risk | high |
| Ishihara, 2016         | NCT02175784  | Unclear Risk | Low Risk | Medium Risk | Low Risk     | Low Risk     | Low Risk     | Low Risk     | high |
| Jabbour, 2013          | NCT00984867  | Unclear Risk | Low Risk | Medium Risk | Low Risk     | Low Risk     | High Risk    | Unclear risk | high |
| Ji, 2015               | NCT01381900  | Low Risk     | Low Risk | Low Risk    | Low Risk     | Low Risk     | High Risk    | Unclear risk | high |
| Ji, 2014               | NCT01095653  | Low Risk     | Low Risk | Low Risk    | Low Risk     | Low Risk     | High Risk    | Unclear risk | high |
| Kadokura, 2014         | NCT01023945  | Low Risk     | Low Risk | Low Risk    | Low Risk     | Low Risk     | Low Risk     | Unclear risk | low  |
| Kadowaki, 2015         | NCT01193218  | Low Risk     | Low Risk | Low Risk    | Medium Risk  | Low Risk     | High Risk    | Unclear risk | high |
| Kaku, 2013             | NCT00972244  | Low Risk     | Low Risk | Low Risk    | Unclear Risk | Low Risk     | High Risk    | Unclear risk | high |
| Kaku, 2014             | none         | Unclear Risk | low Risk | Low Risk    | Unclear Risk | Medium Risk  | Unclear Risk | Unclear risk | high |
| Kaku, 2014             | None         | Low Risk     | Low Risk | Low Risk    | Low Risk     | Low Risk     | Low Risk     | Unclear risk | low  |
| Kashiwagi, 2015        | NCT01242215  | Low Risk     | Low Risk | Low Risk    | Unclear Risk | Low Risk     | Low Risk     | Unclear risk | low  |
| Kashiwagi, 2015        | NCT01057628. | Low Risk     | Low Risk | Low Risk    | Low Risk     | Low Risk     | Low Risk     | Unclear risk | low  |
| Kashiwagi, 2014        | NCT00621868  | Unclear Risk | Low Risk | Low Risk    | Low Risk     | Low Risk     | Low Risk     | Unclear risk | low  |
| Kashiwagi, 2015        | NCT01316094  | Unclear Risk | Low Risk | Low Risk    | Low Risk     | Low Risk     | Low Risk     | Unclear risk | low  |
| Kohan, 2014            | NCT00663260  | Unclear Risk | Low Risk | Low Risk    | Unclear Risk | Low Risk     | Low Risk     | Unclear risk | high |
| Kovacs, 2015           | NCT01210001  | Low Risk     | Low Risk | Low Risk    | Medium Risk  | Low Risk     | High Risk    | Unclear risk | high |
| Heerspink, 2013        | NCT00976495  | Low Risk     | Low Risk | Low Risk    | Low Risk     | Low Risk     | Low Risk     | Unclear risk | low  |
| Lavalle-Gonzalez, 2013 | NCT01106677  | Low Risk     | Low Risk | Low Risk    | Low Risk     | Low Risk     | High Risk    | Unclear risk | high |
| Leiter, 2014           | NCT01042977  | Low Risk     | Low Risk | Low Risk    | Low Risk     | Unclear Risk | Low Risk     | Unclear risk | low  |
| Leiter, 2015           | NCT00968812  | Low Risk     | Low Risk | Low Risk    | Low Risk     | Low Risk     | High Risk    | Unclear risk | high |
| Lewin, 2015            | NCT01422876  | Unclear Risk | Low Risk | Low Risk    | Low Risk     | Low Risk     | Low Risk     | Low Risk     | low  |
| List, 2008             | NCT00263276  | Unclear Risk | Low Risk | Low Risk    | Low Risk     | Unclear Risk | Low Risk     | Unclear risk | high |

|    |                      |             |              |          |             |              |              |              |              |      |
|----|----------------------|-------------|--------------|----------|-------------|--------------|--------------|--------------|--------------|------|
| 1  | Mathieu, 2015        | NCT01646320 | Low Risk     | Low Risk | Low Risk    | Low Risk     | Low Risk     | Low Risk     | Unclear risk | low  |
| 2  | Matthaei, 2015       | NCT01392677 | Low Risk     | Low Risk | Low Risk    | Low Risk     | Low Risk     | Low Risk     | Unclear risk | low  |
| 3  | Mudaliar, 2013       | None        | Unclear Risk | Low Risk | Low Risk    | Low Risk     | Unclear Risk | Low Risk     | Unclear risk | high |
| 4  | Nishimura, 2015      | NCT01947855 | Unclear Risk | Low Risk | Low Risk    | Low Risk     | Low Risk     | Low Risk     | Unclear risk | low  |
| 5  | Qiu, 2014            | NCT01340664 | Low Risk     | Low Risk | Low Risk    | Low Risk     | Low Risk     | Low Risk     | Unclear risk | low  |
| 6  | Rodbard, 2016        | NCT01989754 | Low Risk     | Low Risk | Low Risk    | Low Risk     | Low Risk     | Low Risk     | Unclear risk | low  |
| 7  | Roden, 2015          | NCT01289990 | Low Risk     | Low Risk | Low Risk    | Low Risk     | Low Risk     | High Risk    | Unclear risk | high |
| 8  | Rosenstock, 2012     | NCT00642278 | Unclear Risk | Low Risk | Low Risk    | Low Risk     | Low Risk     | Low Risk     | Unclear risk | low  |
| 9  | Rosenstock, 2015     | NCT01376557 | Unclear Risk | Low Risk | Low Risk    | Low Risk     | Low Risk     | Low Risk     | Unclear risk | low  |
| 10 | Rosenstock, 2016     | NCT01809327 | Low Risk     | Low Risk | Low Risk    | Low Risk     | Low Risk     | High Risk    | Unclear risk | high |
| 11 | Rosenstock, 2015     | NCT01606007 | Low Risk     | Low Risk | Low Risk    | Low risk     | Low Risk     | Low Risk     | Unclear risk | low  |
| 12 | Rosenstock, 2014     | NCT01306214 | Low Risk     | Low Risk | Low Risk    | Low Risk     | Low Risk     | High Risk    | Unclear risk | high |
| 13 | Rosenstock, 2015     | NCT01011868 | Low Risk     | Low Risk | Low Risk    | Low Risk     | Low Risk     | High Risk    | Unclear risk | high |
| 14 | Rosenstock, 2012     | NCT00683878 | Unclear Risk | Low Risk | Low Risk    | Low Risk     | Low Risk     | Low Risk     | Unclear risk | low  |
| 15 | Ross, 2015           | None        | Unclear Risk | Low Risk | Low Risk    | Low Risk     | Low Risk     | Low Risk     | Unclear risk | low  |
| 16 | Sasaki, 2015         | None        | Low Risk     | Low Risk | Medium Risk | High Risk    | Unclear Risk | Unclear Risk | High Risk    | high |
| 17 | Schernthaner, 2013   | NCT01137812 | Low Risk     | Low Risk | Low Risk    | Low Risk     | Low Risk     | Low Risk     | Unclear risk | low  |
| 18 | Schumm-Draeger, 2014 | NCT01217892 | Low Risk     | Low Risk | Low Risk    | Low Risk     | Low Risk     | Low Risk     | Unclear risk | low  |
| 19 | Seino, 2014          | None        | Low Risk     | Low Risk | Low Risk    | Low Risk     | Low Risk     | Low Risk     | Unclear Risk | low  |
| 20 | Seino, 2014          | None        | Low Risk     | Low Risk | Low Risk    | Low Risk     | Low Risk     | Low Risk     | Unclear Risk | low  |
| 21 | Seino, 2014          | None        | Low Risk     | Low Risk | Low Risk    | Low Risk     | Low Risk     | Low Risk     | Unclear Risk | low  |
| 22 | Stenlof, 2013        | NCT01081834 | Unclear Risk | Low Risk | Low Risk    | Unclear Risk | Low Risk     | Low Risk     | Unclear Risk | high |
| 23 | Strojek, 2014        | NCT00680745 | Low Risk     | Low Risk | Low Risk    | Low Risk     | Low Risk     | High Risk    | Unclear Risk | high |
| 24 | Sykes, 2015          | NCT00500331 | Unclear Risk | Low Risk | Low Risk    | Low Risk     | Low Risk     | Low Risk     | Unclear Risk | low  |
| 25 | Tikkanen, 2015       | NCT01370005 | Medium Risk  | Low Risk | Low Risk    | Low Risk     | Low Risk     | Low Risk     | Unclear Risk | high |
| 26 | Townsend, 2016       | None        | Unclear Risk | Low Risk | Low Risk    | Low Risk     | Low Risk     | Low Risk     | Unclear Risk | low  |
| 27 | Seman, 2016          | None        | Unclear Risk | Low Risk | High Risk   | High Risk    | Unclear Risk | Unclear Risk | Unclear Risk | high |
| 28 |                      |             |              |          |             |              |              |              |              |      |
| 29 |                      |             |              |          |             |              |              |              |              |      |
| 30 |                      |             |              |          |             |              |              |              |              |      |
| 31 |                      |             |              |          |             |              |              |              |              |      |
| 32 |                      |             |              |          |             |              |              |              |              |      |
| 33 |                      |             |              |          |             |              |              |              |              |      |
| 34 |                      |             |              |          |             |              |              |              |              |      |
| 35 |                      |             |              |          |             |              |              |              |              |      |
| 36 |                      |             |              |          |             |              |              |              |              |      |
| 37 |                      |             |              |          |             |              |              |              |              |      |
| 38 |                      |             |              |          |             |              |              |              |              |      |
| 39 |                      |             |              |          |             |              |              |              |              |      |
| 40 |                      |             |              |          |             |              |              |              |              |      |
| 41 |                      |             |              |          |             |              |              |              |              |      |
| 42 |                      |             |              |          |             |              |              |              |              |      |
| 43 |                      |             |              |          |             |              |              |              |              |      |
| 44 |                      |             |              |          |             |              |              |              |              |      |
| 45 |                      |             |              |          |             |              |              |              |              |      |
| 46 |                      |             |              |          |             |              |              |              |              |      |
| 47 |                      |             |              |          |             |              |              |              |              |      |

|    |                            |             |              |          |           |              |             |           |              |      |
|----|----------------------------|-------------|--------------|----------|-----------|--------------|-------------|-----------|--------------|------|
| 1  |                            |             |              |          |           |              |             |           |              |      |
| 2  |                            |             |              |          |           |              |             |           |              |      |
| 3  | Weber, 2016                | NCT01137474 | Low Risk     | Low Risk | Low Risk  | Low Risk     | Medium Risk | High Risk | Unclear Risk | high |
| 4  | Weber, 2016                | NCT01195662 | Low Risk     | Low Risk | Low Risk  | Low Risk     | Low Risk    | High Risk | Unclear Risk | high |
| 5  | Wilding; 2013              | NCT01106625 | Low Risk     | Low Risk | Low Risk  | Low Risk     | Low Risk    | High Risk | Unclear Risk | high |
| 6  | Wilding, 2013              | NCT01117584 | Unclear Risk | Low Risk | Low Risk  | Low Risk     | Low Risk    | Low Risk  | Unclear Risk | low  |
| 7  | Wilding, 2009              | NCT00357370 | Unclear Risk | Low Risk | Low Risk  | Low Risk     | Low Risk    | Low Risk  | Unclear Risk | low  |
| 8  | Wilding, 2014              | NCT00673231 | Low Risk     | Low Risk | Low Risk  | Low Risk     | Low Risk    | High Risk | Unclear Risk | high |
| 9  | Yale, 2014                 | NCT01064414 | Unclear Risk | Low Risk | Low Risk  | Low Risk     | Low Risk    | Low Risk  | Unclear Risk | low  |
| 10 | Zhao, 2015                 | NCT01316341 | Medium Risk  | Low Risk | Low Risk  | Low risk     | Low Risk    | Low Risk  | Unclear Risk | high |
| 11 | Zinman, 2015               | NCT01131676 | Low Risk     | Low Risk | Low Risk  | Low Risk     | Low Risk    | Low Risk  | Low Risk     | low  |
| 12 | Goto, 2012                 | None        | Unclear Risk | Low Risk | Low Risk  | Unclear Risk | Low Risk    | Low Risk  | Unclear risk | high |
| 13 | Dagogo-Jack, 2017          | NCT02036515 | Low Risk     | Low Risk | Low Risk  | Unclear Risk | Low Risk    | Low Risk  | Unclear risk | low  |
| 14 | Maldonado-Lutomirsky, 2016 | NCT01734785 | Unclear Risk | Low Risk | Low Risk  | Unclear Risk | Low Risk    | Low Risk  | Unclear risk | high |
| 15 | Merker, 2015               | NCT01289990 | Unclear Risk | Low Risk | Low Risk  | Low Risk     | Low Risk    | Low Risk  | Unclear Risk | low  |
| 16 | Neal, 2015                 | NCT01032629 | Low Risk     | Low Risk | Low Risk  | Low Risk     | Low Risk    | Low Risk  | Unclear risk | low  |
| 17 | Ridderstrale, 2014         | NCT01167881 | Low Risk     | Low Risk | Low Risk  | Low Risk     | Low Risk    | Low Risk  | Unclear Risk | low  |
| 18 | Sykes, 2014                | NCT00495469 | Low Risk     | Low Risk | Low Risk  | Low Risk     | Low Risk    | Low Risk  | Unclear Risk | low  |
| 19 | Tanizawa, 2014             | None        | Low Risk     | Low Risk | High Risk | High Risk    | Low Risk    | Low Risk  | Unclear Risk | high |
| 20 | Yang, 2014                 | NCT01095666 | Unclear Risk | Low Risk | Low Risk  | Low Risk     | Low Risk    | Low Risk  | Unclear Risk | low  |
| 21 | Gupta, 2017                | None        | Low Risk     | Low Risk | Low Risk  | Low Risk     | Low Risk    | Low Risk  | Unclear Risk | low  |
| 22 | Kadowaki, 2017             | NCT02354235 | Low Risk     | Low Risk | Low Risk  | Low Risk     | Low Risk    | Low Risk  | Unclear Risk | low  |
| 23 | Softeland, 2017            | NCT01734785 | Low Risk     | Low Risk | Low Risk  | Low Risk     | Low Risk    | Low Risk  | Unclear Risk | low  |
| 24 | Terra, 2017                | NCT01958671 | Low Risk     | Low Risk | Low Risk  | Low Risk     | Low Risk    | Low Risk  | Unclear Risk | low  |
| 25 | ClinicalTrials.gov         |             | Low Risk     | Low Risk | Low Risk  | Low Risk     | Low Risk    | Low Risk  | Unclear Risk | low  |
| 26 | Terauchi, 2017             | NCT02201004 | Low Risk     | Low Risk | Low Risk  | Low Risk     | Low Risk    | Low Risk  | Unclear Risk | low  |
| 27 | Grunberger, 2018           | NCT01986855 | Low Risk     | Low Risk | High Risk | High Risk    | High Risk   | Low Risk  | Unclear Risk | high |
| 28 | Hollander, 2018            | NCT01999218 | Low Risk     | Low Risk | Low Risk  | Low Risk     | Low Risk    | Low Risk  | Unclear risk | Low  |
| 29 | Ito, 2017                  |             | Low Risk     | Low Risk | High Risk | High Risk    | Low Risk    | Low Risk  | Unclear risk | High |
| 30 |                            |             |              |          |           |              |             |           |              |      |
| 31 |                            |             |              |          |           |              |             |           |              |      |
| 32 |                            |             |              |          |           |              |             |           |              |      |
| 33 |                            |             |              |          |           |              |             |           |              |      |
| 34 |                            |             |              |          |           |              |             |           |              |      |
| 35 |                            |             |              |          |           |              |             |           |              |      |
| 36 |                            |             |              |          |           |              |             |           |              |      |
| 37 |                            |             |              |          |           |              |             |           |              |      |
| 38 |                            |             |              |          |           |              |             |           |              |      |
| 39 |                            |             |              |          |           |              |             |           |              |      |
| 40 |                            |             |              |          |           |              |             |           |              |      |
| 41 |                            |             |              |          |           |              |             |           |              |      |
| 42 |                            |             |              |          |           |              |             |           |              |      |
| 43 |                            |             |              |          |           |              |             |           |              |      |
| 44 |                            |             |              |          |           |              |             |           |              |      |
| 45 |                            |             |              |          |           |              |             |           |              |      |
| 46 |                            |             |              |          |           |              |             |           |              |      |
| 47 |                            |             |              |          |           |              |             |           |              |      |

|                  |             |              |          |          |          |           |           |              |      |
|------------------|-------------|--------------|----------|----------|----------|-----------|-----------|--------------|------|
| Pratley, 2017    | NCT02099110 | Low Risk     | Low Risk | Low Risk | Low Risk | Low Risk  | Low Risk  | Unclear risk | Low  |
| Rosenstock, 2017 | NCT02033889 | Low Risk     | Low Risk | Low Risk | Low Risk | Low Risk  | Low Risk  | Unclear risk | Low  |
| Seino, 2018      |             | Low Risk     | Low Risk | Low Risk | Low Risk | Low Risk  | Low Risk  | Unclear risk | Low  |
| Yang, 2018       | NCT02096705 | Low Risk     | Low Risk | Low Risk | Low Risk | Low Risk  | Low Risk  | Unclear risk | Low  |
| Mansfeild, 2017  | NCT02429258 | Low Risk     | Low Risk | Low Risk | Low Risk | Low Risk  | Low Risk  | Unclear Risk | Low  |
| Ekholm, 2017     | NCT01606007 | Unclear Risk | Low Risk | Low Risk | Low Risk | High Risk | High Risk | Unclear Risk | High |

For peer review only

Figure 14A. Risk of Bias Assessment

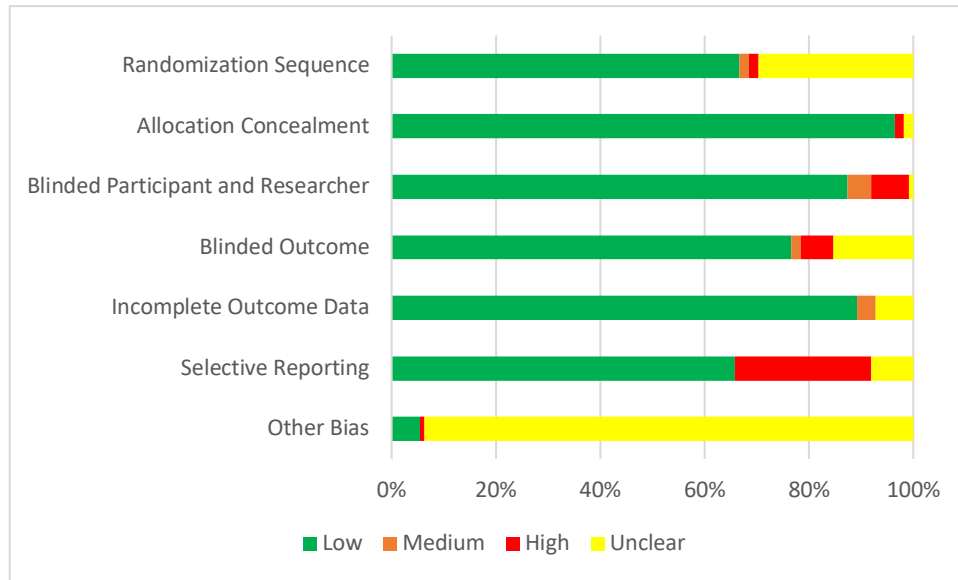

### Section 7: Assessment of Publication Bias

Figure 15A. Funnel Plot for Placebo Controlled Trials: Acute Kidney Injury

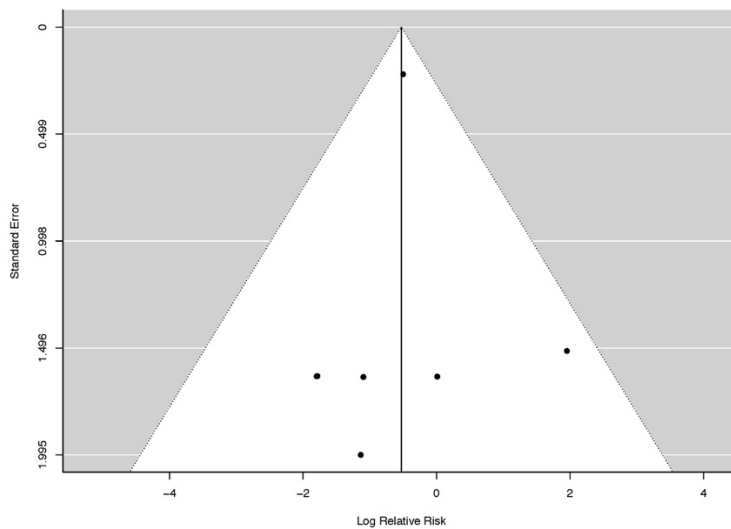



Figure 16A. Funnel Plot for Placebo Controlled Trials: Urinary Tract Infection

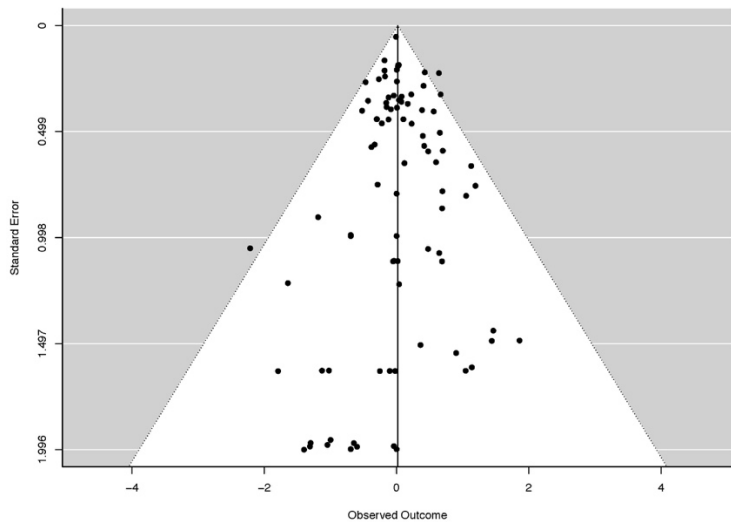

Figure 17A. Funnel Plot for Metformin Controlled Trials: Urinary Tract Infection

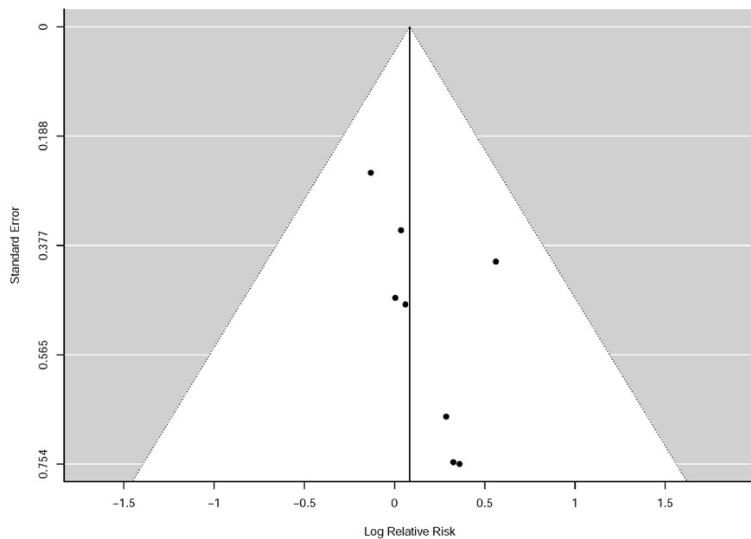

1  
2  
3  
4  
5  
6  
7  
8  
9  
10  
11  
12  
13  
14  
15  
16  
17  
18  
19  
20  
21  
22  
23  
24  
25  
26  
27  
28  
29  
30  
31  
32  
33  
34  
35  
36  
37  
38  
39  
40  
41  
42  
43  
44  
45  
46  
47  
48  
49  
50  
51  
52  
53  
54  
55  
56  
57  
58  
59  
60

Figure 18A. Funnel Plot for Sulfonylurea Controlled Trials: Urinary Tract Infection

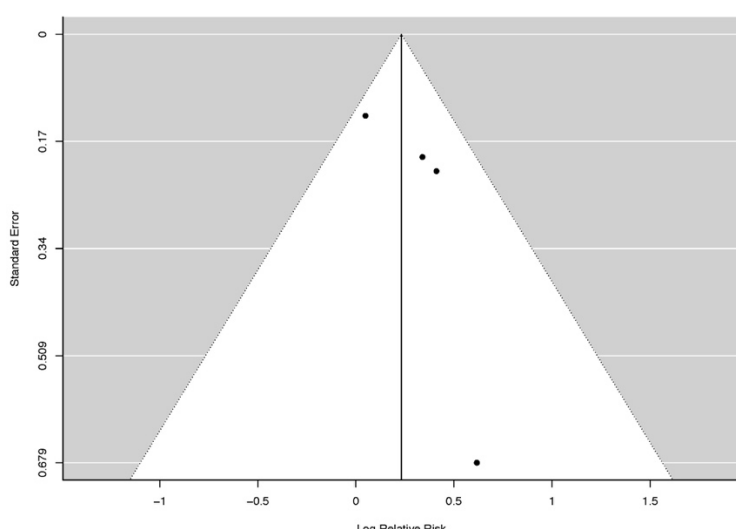

Figure 19A. Funnel Plot for Incretin Controlled Trials: Urinary Tract Infection

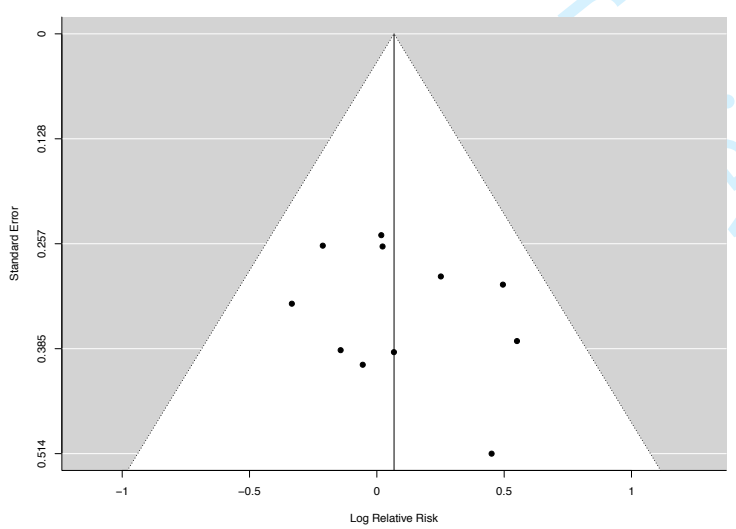

Figure 20A. Funnel Plot for Placebo Controlled Trials: Fracture

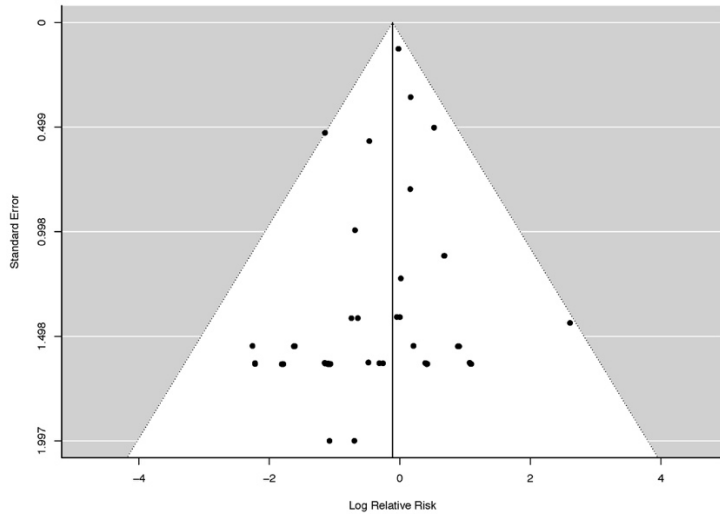

Peer review only



# PRISMA 2009 Checklist

| Section/topic                      | #  | Checklist item                                                                                                                                                                                                                                                                                              | Reported on page # |
|------------------------------------|----|-------------------------------------------------------------------------------------------------------------------------------------------------------------------------------------------------------------------------------------------------------------------------------------------------------------|--------------------|
| <b>TITLE</b>                       |    |                                                                                                                                                                                                                                                                                                             |                    |
| Title                              | 1  | Identify the report as a systematic review, meta-analysis, or both.                                                                                                                                                                                                                                         | 1                  |
| <b>ABSTRACT</b>                    |    |                                                                                                                                                                                                                                                                                                             |                    |
| Structured summary                 | 2  | Provide a structured summary including, as applicable: background; objectives; data sources; study eligibility criteria, participants, and interventions; study appraisal and synthesis methods; results; limitations; conclusions and implications of key findings; systematic review registration number. | 2                  |
| <b>INTRODUCTION</b>                |    |                                                                                                                                                                                                                                                                                                             |                    |
| Rationale                          | 3  | Describe the rationale for the review in the context of what is already known.                                                                                                                                                                                                                              | 4-5                |
| Objectives                         | 4  | Provide an explicit statement of questions being addressed with reference to participants, interventions, comparisons, outcomes, and study design (PICOS).                                                                                                                                                  | 5                  |
| <b>METHODS</b>                     |    |                                                                                                                                                                                                                                                                                                             |                    |
| Protocol and registration          | 5  | Indicate if a review protocol exists, if and where it can be accessed (e.g., Web address), and, if available, provide registration information including registration number.                                                                                                                               | 5                  |
| Eligibility criteria               | 6  | Specify study characteristics (e.g., PICOS, length of follow-up) and report characteristics (e.g., years considered, language, publication status) used as criteria for eligibility, giving rationale.                                                                                                      | 6                  |
| Information sources                | 7  | Describe all information sources (e.g., databases with dates of coverage, contact with study authors to identify additional studies) in the search and date last searched.                                                                                                                                  | 5                  |
| Search                             | 8  | Present full electronic search strategy for at least one database, including any limits used, such that it could be repeated.                                                                                                                                                                               | Appendix           |
| Study selection                    | 9  | State the process for selecting studies (i.e., screening, eligibility, included in systematic review, and, if applicable, included in the meta-analysis).                                                                                                                                                   | 6                  |
| Data collection process            | 10 | Describe method of data extraction from reports (e.g., piloted forms, independently, in duplicate) and any processes for obtaining and confirming data from investigators.                                                                                                                                  | 6                  |
| Data items                         | 11 | List and define all variables for which data were sought (e.g., PICOS, funding sources) and any assumptions and simplifications made.                                                                                                                                                                       | Appendix           |
| Risk of bias in individual studies | 12 | Describe methods used for assessing risk of bias of individual studies (including specification of whether this was done at the study or outcome level), and how this information is to be used in any data synthesis.                                                                                      | 7                  |
| Summary measures                   | 13 | State the principal summary measures (e.g., risk ratio, difference in means).                                                                                                                                                                                                                               | 7                  |
| Synthesis of results               | 14 | Describe the methods of handling data and combining results of studies, if done, including measures of consistency (e.g., $I^2$ ) for each meta-analysis.                                                                                                                                                   | 7                  |

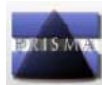

# PRISMA 2009 Checklist

| Section/topic                 | #  | Checklist item                                                                                                                                                                                           | Reported on page #    |
|-------------------------------|----|----------------------------------------------------------------------------------------------------------------------------------------------------------------------------------------------------------|-----------------------|
| Risk of bias across studies   | 15 | Specify any assessment of risk of bias that may affect the cumulative evidence (e.g., publication bias, selective reporting within studies).                                                             | 7                     |
| Additional analyses           | 16 | Describe methods of additional analyses (e.g., sensitivity or subgroup analyses, meta-regression), if done, indicating which were pre-specified.                                                         | 7                     |
| <b>RESULTS</b>                |    |                                                                                                                                                                                                          |                       |
| Study selection               | 17 | Give numbers of studies screened, assessed for eligibility, and included in the review, with reasons for exclusions at each stage, ideally with a flow diagram.                                          | 8, figure 1           |
| Study characteristics         | 18 | For each study, present characteristics for which data were extracted (e.g., study size, PICOS, follow-up period) and provide the citations.                                                             | Appendix              |
| Risk of bias within studies   | 19 | Present data on risk of bias of each study and, if available, any outcome level assessment (see item 12).                                                                                                | Appendix              |
| Results of individual studies | 20 | For all outcomes considered (benefits or harms), present, for each study: (a) simple summary data for each intervention group (b) effect estimates and confidence intervals, ideally with a forest plot. | figures 2-6, appendix |
| Synthesis of results          | 21 | Present results of each meta-analysis done, including confidence intervals and measures of consistency.                                                                                                  | 8-9                   |
| Risk of bias across studies   | 22 | Present results of any assessment of risk of bias across studies (see Item 15).                                                                                                                          | Figure 7              |
| Additional analysis           | 23 | Give results of additional analyses, if done (e.g., sensitivity or subgroup analyses, meta-regression [see Item 16]).                                                                                    | 9                     |
| <b>DISCUSSION</b>             |    |                                                                                                                                                                                                          |                       |
| Summary of evidence           | 24 | Summarize the main findings including the strength of evidence for each main outcome; consider their relevance to key groups (e.g., healthcare providers, users, and policy makers).                     | 10                    |
| Limitations                   | 25 | Discuss limitations at study and outcome level (e.g., risk of bias), and at review-level (e.g., incomplete retrieval of identified research, reporting bias).                                            | 12                    |
| Conclusions                   | 26 | Provide a general interpretation of the results in the context of other evidence, and implications for future research.                                                                                  | 13                    |
| <b>FUNDING</b>                |    |                                                                                                                                                                                                          |                       |
| Funding                       | 27 | Describe sources of funding for the systematic review and other support (e.g., supply of data); role of funders for the systematic review.                                                               | 13                    |

From: Moher D, Liberati A, Tetzlaff J, Altman DG, The PRISMA Group (2009). Preferred Reporting Items for Systematic Reviews and Meta-Analyses: The PRISMA Statement. PLoS Med 6(6): e1000097. doi:10.1371/journal.pmed1000097

For more information, visit: [www.prisma-statement.org](http://www.prisma-statement.org).
